# Supplementary material for: Perception of Selected Factors on the Sustainability of SMEs: Empirical Study from Visegrad Group Countries
Source: Preprints.org preprint supplement (doi:10.20944/preprints202402.1746.v1), 2024-02-29
Supplement: Supplementary file 1 [file supplementary]

## Sheet: Sheet1
Respondents	Nationality	Q1	DCH1	DCH2	DCH3	DCH4	DCH5	DCH6	CHR1	CHR2	CHR3	CHR4	CHR5	CHR6	CHR7	RSM1	RSM2	RSM3	RSM4	MR1	MR2	MR3	MR4	HRM1	HRM2	HRM3	HRM4	NSLCH1	NSLCH2	NSLCH3	NSLCH4	CSR1	CSR2	CSR3	CSR4	OR1	OR2	OR3	OR4	FR1	FR2	FR3	FR4	S1	S2	S3	S4	CEB1	CEB2
a2d8bb0f4172952d	1	1	1	1	6	2	1	2	2	2	4	3	1	1	3	2	2	2	2	2	3	4	2	2	2	4	2	4	4	4	3	3	3	3	3	2	2	3	4	4	3	3	3	2	2	2	2	2	2
3170e2b2710a9bc2	1	1	3	1	3	2	1	1	1	2	2	2	1	1	4	1	2	3	4	1	2	3	4	1	2	3	4	1	2	3	4	2	2	2	2	2	2	2	3	2	2	2	3	2	2	3	3	1	1
96336f2c37142551	1	1	1	1	7	2	2	2	2	1	4	3	1	1	4	2	3	3	2	3	4	3	1	1	2	3	3	3	3	3	3	3	3	3	3	1	1	1	1	2	1	1	1	1	1	1	1	2	3
8d38a760528bda0e	1	1	1	1	4	3	1	2	2	1	3	3	1	1	2	3	3	2	3	3	4	5	2	2	3	3	3	2	3	3	3	4	4	4	4	3	3	3	3	4	3	3	3	3	3	4	3	3	3
2a5a8ede3a702a23	1	1	1	1	8	2	1	2	1	1	3	3	1	1	2	2	2	2	2	3	4	4	4	3	3	3	3	4	4	4	2	3	3	3	3	3	3	3	3	3	3	2	3	2	2	2	2	3	2
22c5d005831f9392	1	1	1	2	3	4	1	2	2	3	2	2	1	1	3	1	3	2	3	4	5	3	1	1	3	5	2	4	3	4	4	3	2	2	2	1	3	1	1	2	4	2	1	2	2	2	1	2	3
2f42357d5d341715	1	1	1	1	7	2	1	2	2	4	4	2	1	1	7	2	2	2	2	2	2	2	2	2	2	2	2	2	2	2	2	3	3	3	3	3	3	3	3	3	3	3	3	3	3	3	3	3	3
e9eb9dcda383ba52	1	1	2	1	2	2	1	1	1	1	4	1	1	1	4	1	1	1	1	1	1	1	1	1	1	1	1	4	1	1	2	1	1	2	1	1	1	1	1	1	1	1	1	1	1	1	2	3	2
839fb2fcfe01c603	1	1	1	2	5	4	2	2	2	2	2	1	1	2	3	2	1	3	5	2	2	1	4	2	5	2	2	2	3	4	3	1	2	2	1	1	2	1	2	1	2	2	1	1	2	4	5	1	2
ba2b608abb2ef38d	1	1	1	1	7	1	1	2	1	1	3	1	1	1	1	1	3	2	3	1	1	4	3	4	3	3	1	3	2	2	3	1	1	1	1	4	2	2	2	4	1	2	3	1	1	1	1	1	2
6a5e58cbfa24d304	1	1	1	1	4	2	2	2	2	3	2	3	1	2	1	2	2	2	2	2	2	2	2	2	4	3	2	5	4	4	3	2	2	2	2	4	4	4	4	5	4	4	4	2	2	2	2	2	2
f03800b42ad1d040	1	1	1	1	3	2	1	2	1	2	3	3	1	1	4	1	2	3	1	4	4	4	2	1	1	5	1	5	2	2	3	1	1	1	1	2	2	2	2	3	4	1	2	1	1	1	1	1	1
e6a77ef09ca7e481	1	1	1	1	2	2	1	1	1	1	2	1	1	1	2	1	1	1	1	2	1	1	2	1	1	1	1	1	1	1	1	1	1	1	1	1	1	1	1	1	1	1	1	1	1	1	1	1	1
cdc3c2e4e2f3ff52	1	1	1	1	7	4	1	2	2	4	2	3	1	2	2	3	4	4	4	3	4	4	1	4	4	4	4	5	3	4	5	3	3	4	4	4	4	4	3	4	2	2	2	2	3	4	4	2	3
1a93a2defd784288	1	1	2	1	5	3	1	1	1	1	1	1	1	1	2	2	5	4	5	4	3	3	3	1	5	4	5	2	1	2	1	5	5	4	5	4	5	4	5	2	5	5	5	2	5	4	5	1	2
790c8194b4339b8e	1	1	1	1	7	3	1	2	2	2	2	1	1	1	1	2	2	2	2	1	2	2	2	1	1	2	2	2	2	2	1	2	2	1	2	2	1	2	2	1	1	2	2	2	2	1	2	2	2
b7362af4f23bafed	1	1	1	1	7	4	1	2	1	3	2	3	1	1	1	1	3	2	3	4	5	5	1	1	2	5	1	5	2	4	4	2	2	3	2	2	3	3	2	3	4	3	4	2	2	3	3	1	2
a16b5314042899d8	1	1	1	1	4	4	1	2	2	1	2	3	1	1	2	2	3	3	3	3	4	4	2	2	2	4	2	4	3	3	3	2	2	2	2	3	3	2	2	3	4	2	2	2	2	2	2	2	2
514b35b094d1280b	1	1	3	1	7	4	1	2	1	3	1	3	2	2	3	3	1	5	5	1	1	1	1	1	1	1	1	1	1	1	1	1	1	1	1	1	1	1	1	1	1	1	1	1	1	1	1	1	1
6f2dd2c70bd15029	1	1	1	1	7	3	1	2	2	2	4	1	1	1	2	1	4	4	3	2	5	5	2	1	2	3	3	5	5	5	5	2	2	2	4	4	4	4	4	5	4	2	3	2	2	3	2	4	3
e2ba6a9c1c660e97	1	1	1	1	7	4	1	2	1	4	2	3	1	1	2	3	4	3	4	4	2	3	4	1	3	4	2	4	4	3	3	3	3	3	3	4	4	3	2	4	2	4	3	2	2	3	3	2	2
5db4bc106bdd781c	1	1	2	2	4	2	2	1	1	2	3	1	1	2	7	2	1	2	3	3	3	2	2	1	2	3	2	1	2	1	1	2	2	4	3	1	2	3	3	1	2	3	2	2	1	1	2	1	2
bac71e81f21bd79e	1	1	1	1	2	1	1	1	2	2	2	3	1	1	1	1	1	1	1	5	5	5	1	1	1	1	1	5	5	5	5	1	1	1	1	1	1	1	1	1	1	1	1	1	1	1	1	1	1
ffa6b523284f9cce	1	1	1	2	3	4	1	2	1	3	4	2	2	2	4	2	3	4	3	2	2	2	1	1	4	4	1	5	5	2	4	4	4	4	4	1	2	2	1	3	1	1	1	1	2	2	2	5	5
9e613781e2a21d0e	1	1	1	1	7	4	1	2	2	4	4	2	1	2	2	1	3	4	3	5	4	4	1	2	2	2	2	5	5	4	4	2	2	2	2	3	2	4	2	4	2	2	2	1	1	2	1	2	4
e8ff82096992dd44	1	1	1	1	7	4	1	2	2	3	3	1	1	2	2	2	2	3	3	3	4	3	2	2	2	3	3	4	4	3	3	2	3	4	3	4	4	3	2	4	3	3	4	2	2	3	3	2	3
042cb6ac6132fdba	1	1	1	1	7	3	1	2	2	3	4	1	2	1	2	1	1	1	1	2	3	3	3	1	2	3	2	4	4	4	4	1	2	2	2	2	3	3	4	3	5	5	5	3	3	3	3	3	3
79db2b61b47437ca	1	1	1	1	7	3	1	2	1	3	2	1	1	2	1	1	2	2	2	2	3	3	2	2	3	4	3	5	4	5	4	3	3	3	3	3	4	3	3	3	2	2	2	2	2	3	1	2	2
292b790b52bed14b	1	1	3	4	2	1	1	2	1	2	2	3	1	3	3	2	2	2	3	2	2	2	2	2	3	2	2	3	2	2	2	1	2	2	2	2	1	2	1	3	2	3	4	3	2	2	1	3	2
a48cdc89bc0acb44	1	1	2	1	5	3	2	2	1	4	4	3	1	3	1	2	3	3	3	2	2	3	2	2	3	2	3	5	5	5	5	2	2	2	2	2	2	2	2	3	2	2	3	2	2	2	2	4	3
1d70917cc2af56a1	1	1	1	1	7	4	1	2	2	4	4	1	1	1	2	1	4	4	3	4	4	4	1	2	2	5	2	4	4	4	4	2	2	1	2	2	3	2	1	2	1	2	2	2	1	2	2	2	4
4085827e9195dfb0	1	1	2	1	7	2	2	1	1	2	4	1	1	1	1	1	1	1	1	1	1	1	1	1	1	1	1	1	1	1	2	1	1	1	1	1	1	1	1	1	1	1	1	2	1	1	1	2	2
2de4507f720a35db	1	1	1	1	3	3	1	2	1	1	3	3	1	1	2	2	3	2	4	3	4	4	3	3	3	3	2	5	5	5	3	3	3	3	3	3	4	4	4	5	5	5	5	3	3	3	3	1	1
f64e23f3144cdfef	1	1	1	1	1	2	1	2	1	2	4	2	1	1	2	1	1	1	1	1	1	4	4	1	1	4	3	5	5	5	5	1	1	1	1	1	4	2	4	2	4	1	1	1	1	1	1	1	1
b92c7098d1395db9	1	1	1	1	7	2	1	2	1	4	3	3	1	1	8	2	3	3	3	3	3	2	3	3	3	3	3	4	3	3	3	3	3	3	3	2	2	3	2	3	3	3	3	2	2	2	2	3	3
f9b6367a84eaeded	1	1	1	1	8	1	1	2	1	2	4	1	1	2	1	1	1	1	1	1	4	1	1	3	3	5	1	4	5	5	5	4	4	4	4	1	1	1	1	3	5	1	1	1	1	1	1	5	5
fd2f26cc9e62ad17	1	1	2	2	2	2	1	2	1	1	2	1	1	1	4	1	2	2	3	2	2	2	3	1	2	2	1	1	2	1	2	1	2	1	2	1	2	1	2	1	2	2	2	1	2	2	2	1	2
89c162198cba4a66	1	1	1	1	7	1	1	1	1	1	4	1	1	1	1	2	2	2	2	5	2	4	3	1	2	2	2	4	4	3	3	2	3	3	3	3	3	2	2	3	3	3	3	2	2	2	2	3	2
e9728eb35a1a8883	1	1	2	2	3	2	1	1	2	2	3	1	1	1	6	1	1	1	1	1	1	1	1	1	1	1	1	1	1	1	1	1	1	1	1	1	1	1	1	1	1	1	1	1	1	1	1	1	1
2d7f248fc938ff87	1	1	2	2	4	4	1	2	2	3	4	1	1	2	2	1	3	2	1	2	1	2	2	1	1	1	1	3	3	1	2	1	2	2	1	1	2	1	1	1	2	1	1	1	1	1	1	4	4
68dfb2c810d95304	1	1	1	1	5	1	2	2	1	1	2	2	2	1	3	1	2	1	1	2	2	2	2	1	2	1	2	3	2	3	3	1	2	1	2	2	2	2	2	2	3	2	2	2	2	2	2	2	2
316b014196020573	1	1	1	1	2	4	1	2	2	2	4	1	1	1	2	1	1	1	1	3	2	2	2	3	2	2	2	2	2	2	2	2	2	2	1	1	2	2	1	1	2	2	2	1	2	2	2	3	2
4c0a6b0fa1b1292a	1	1	1	1	7	4	1	1	2	3	2	1	1	1	1	1	1	1	1	1	1	1	1	1	1	1	1	1	1	1	1	1	1	1	1	1	1	1	1	1	1	1	1	1	1	1	1	1	1
fa4889c5c5256767	1	1	3	2	4	4	1	1	2	2	4	2	2	1	2	2	2	2	2	2	3	3	1	2	2	3	2	4	3	3	3	2	2	2	3	2	2	3	2	2	3	2	2	2	1	2	2	2	3
b5c797afd388f629	1	1	1	2	1	2	1	2	1	2	4	1	1	1	2	2	2	3	2	2	3	2	3	2	3	3	2	3	2	3	2	1	2	2	2	1	2	2	3	3	2	3	3	3	2	3	3	1	2
3a368ed3e96c9f49	1	1	1	1	7	1	1	2	1	3	4	2	1	2	2	2	3	2	2	2	2	2	2	2	2	5	2	5	5	1	5	2	2	2	2	3	5	3	3	2	2	2	2	2	1	2	2	2	1
7f52918ab6bf2072	1	1	1	1	2	1	1	1	1	1	2	3	1	1	1	1	2	2	2	2	2	4	1	1	1	3	3	4	1	2	2	2	2	2	2	2	2	2	2	3	1	1	1	1	1	2	2	2	2
4b2d507b3abef489	1	1	1	2	7	2	1	2	1	1	2	1	1	1	2	2	1	1	1	4	4	4	2	1	3	4	2	4	3	3	3	2	3	3	3	1	1	2	2	2	3	2	2	2	2	2	2	3	3
52af49a95c3b416a	1	1	1	1	2	3	1	2	2	2	2	3	1	1	3	1	1	1	1	1	1	1	1	1	1	2	1	4	4	2	5	3	3	3	3	3	4	3	5	4	3	4	4	1	1	2	2	1	1
8e15ef7fa6c948a0	1	1	1	1	4	4	1	2	1	2	2	2	1	1	3	1	1	1	1	1	1	1	1	1	1	1	1	3	3	2	2	3	3	2	2	1	1	1	1	1	1	1	1	1	1	1	1	3	2
11f714c788045888	1	1	1	1	3	2	1	2	1	1	4	3	1	1	1	1	1	1	1	2	2	4	2	2	2	4	1	1	1	2	2	1	1	1	1	1	1	1	1	1	1	1	1	1	1	1	1	2	2
412dafaa866e7301	1	1	1	1	7	1	1	2	1	1	3	2	1	1	2	2	3	3	3	4	4	2	2	2	2	2	2	2	2	2	2	2	2	2	2	2	2	2	2	2	2	2	2	2	2	2	2	2	2
16b4b1862a04793d	1	1	2	1	7	1	1	2	1	1	2	2	1	1	4	1	1	1	1	1	1	1	1	1	1	1	1	1	1	1	1	1	1	1	1	1	1	1	1	1	1	1	1	1	1	1	1	1	1
116d64ebf6437b04	1	1	1	1	4	2	1	1	2	1	4	1	1	1	3	1	1	1	1	1	1	1	1	1	1	1	1	1	1	1	1	1	1	1	1	1	1	1	1	1	1	1	1	1	1	1	1	1	1
927424d2ea6d85ff	1	1	1	1	2	4	1	2	1	3	1	1	1	1	2	2	4	4	2	4	4	4	4	4	4	4	4	2	2	4	4	4	4	4	4	2	2	2	2	4	4	4	4	2	2	2	2	2	2
5d6c3e9e334cdfe8	1	1	1	1	7	1	2	1	2	3	4	3	1	1	3	1	1	1	1	1	1	1	1	1	1	1	1	5	1	5	5	1	1	1	1	3	3	3	3	3	3	3	3	1	1	1	1	3	3
0e8eeaeddcaf2571	1	1	1	1	1	4	1	2	2	2	4	3	1	1	1	1	3	2	2	2	2	2	1	1	2	4	2	3	2	4	3	2	2	4	3	2	4	2	2	3	2	2	3	1	1	1	2	2	2
f9783e2686fe012e	1	1	1	1	7	1	1	2	1	1	3	1	2	2	2	1	1	1	1	2	3	4	2	2	3	3	2	2	3	3	3	2	3	3	3	2	2	2	2	3	3	2	2	1	1	1	1	1	2
579b5dbe4e306739	1	1	1	1	3	4	1	2	2	3	4	1	1	1	2	1	3	3	3	3	1	2	3	5	5	5	5	5	4	4	5	3	3	3	3	1	3	3	2	3	3	1	1	2	2	1	1	4	4
502de5b5841e6e26	1	1	1	1	7	4	1	2	2	4	4	3	1	1	1	1	2	1	2	3	4	5	1	1	2	2	2	5	4	4	4	2	2	2	2	3	4	2	3	4	1	2	1	3	2	2	2	2	3
b69821675cc2cf4b	1	1	1	1	4	1	1	2	1	2	4	2	1	1	2	1	1	1	1	1	3	4	1	1	1	3	1	4	4	4	3	1	3	3	3	1	3	1	1	1	1	1	1	1	1	1	1	1	1
634ed773e8b050bd	1	1	1	1	7	4	1	2	1	4	2	1	1	1	1	1	4	4	4	3	4	2	3	2	2	3	2	5	3	4	3	2	2	2	2	2	3	2	2	2	3	2	1	2	2	2	2	2	3
a47a5801b2d09582	1	1	1	1	8	4	1	2	1	2	4	2	1	1	5	1	4	2	2	4	5	4	1	3	4	2	4	5	4	4	2	2	2	4	4	4	3	3	3	4	2	4	3	2	2	2	3	2	3
6518e13332fd1b5f	1	1	1	1	2	2	1	2	1	1	4	3	1	1	2	1	1	1	2	3	3	3	2	1	3	4	3	2	2	2	1	3	3	2	3	3	2	3	2	3	2	2	2	3	3	2	3	3	2
71659cc5300324c7	1	1	1	2	7	3	1	2	1	1	2	1	1	2	1	1	1	1	2	3	4	4	2	2	1	4	1	4	3	4	3	3	2	2	3	1	2	2	2	2	2	2	2	1	1	1	1	3	2
280aec9fe878470b	1	1	1	1	3	3	1	1	2	2	2	2	1	1	1	1	3	3	3	1	1	1	1	1	1	1	1	4	4	3	3	3	3	3	3	1	1	1	1	3	3	3	3	1	1	3	2	3	3
26a91e4f3e5dde7b	1	1	1	1	1	3	2	1	1	1	2	1	1	1	2	1	2	1	1	1	2	1	1	1	2	1	1	1	2	1	1	1	2	1	2	1	1	1	1	1	1	1	1	1	1	1	1	1	1
4a2a2e4c9cf898b4	1	1	1	1	5	4	1	2	2	4	4	1	1	1	1	2	3	3	4	4	4	4	2	2	2	4	2	4	4	4	4	3	2	3	2	4	3	3	3	4	3	2	2	2	2	2	2	2	2
b2a3332fbcc313dd	1	1	1	1	7	4	1	2	2	4	4	2	1	1	5	2	3	2	3	3	2	2	2	2	2	3	2	3	3	3	3	4	3	3	3	2	2	2	2	2	2	2	2	3	3	3	2	4	4
fd00f35c7a50c458	1	1	3	1	4	1	1	2	2	2	4	1	1	1	2	1	1	1	1	1	1	1	1	1	1	1	1	1	1	1	1	1	1	1	1	1	1	1	1	1	1	1	1	1	1	1	1	1	1
2f937592d6858745	1	1	2	3	7	1	2	2	2	1	2	2	2	2	2	1	1	2	3	1	1	2	2	1	2	3	1	3	2	2	3	3	3	3	3	1	4	4	3	3	2	2	2	2	2	2	2	2	2
e39e92d6e99c0d64	1	1	2	1	4	1	1	2	1	1	3	1	2	1	3	1	1	2	1	2	3	1	1	1	2	1	2	5	2	2	2	5	3	5	1	1	3	2	3	1	4	3	3	1	4	4	2	1	4
4e1c9400f13d37c0	1	1	1	1	3	1	1	1	1	3	5	1	1	1	2	1	1	2	2	2	2	4	2	1	1	4	2	2	2	2	4	2	2	1	2	2	3	2	4	2	2	2	2	2	2	2	1	2	2
7474953da886d7a2	1	1	2	2	1	3	1	2	2	2	3	2	1	1	2	1	1	1	1	2	2	2	2	2	2	2	2	2	2	2	2	2	2	2	2	2	2	2	2	2	2	2	2	2	2	2	2	3	3
7550c2fc65b6c3e1	1	1	1	2	4	3	1	2	2	2	4	1	1	1	4	2	2	2	2	2	2	2	2	2	2	2	2	2	2	2	2	2	2	2	2	2	2	2	2	2	2	2	2	2	2	2	2	2	2
41ae48017d29e0e5	1	1	1	1	7	2	1	2	1	2	3	2	1	1	1	1	1	1	1	2	4	4	4	2	4	4	2	5	5	5	5	3	3	3	3	4	4	4	2	4	4	3	2	3	3	4	3	2	2
91d8b89a168b8c88	1	1	1	4	7	1	1	2	2	1	3	1	1	2	3	2	2	2	2	3	3	3	3	2	2	2	2	2	2	2	2	3	3	3	3	2	3	3	3	3	2	2	2	3	3	3	3	2	2
4a175a612e18d980	1	1	3	4	6	3	1	2	1	4	2	3	1	1	3	2	3	3	4	3	4	3	3	3	3	3	3	4	4	2	2	3	3	3	3	3	3	3	3	4	5	3	2	3	3	3	3	3	4
0b66675d6335b159	1	1	2	1	7	4	1	2	2	4	5	1	1	1	2	1	2	1	2	3	2	2	1	1	2	2	1	3	2	2	3	2	2	2	2	2	2	2	2	2	1	1	1	1	2	2	2	2	1
2a0ee6149fc5d434	1	1	1	1	8	2	1	2	1	3	4	1	1	3	4	2	3	2	1	2	3	2	4	2	3	2	2	1	2	2	3	2	1	2	1	2	3	3	2	2	3	2	1	1	2	2	1	2	1
ce167127943b02f8	1	1	1	2	7	1	1	2	1	1	2	3	1	1	3	2	2	2	2	3	3	3	2	2	2	3	2	4	3	3	3	3	3	3	4	3	3	2	2	3	2	2	2	2	2	2	2	1	1
43ef4ac5931a8456	1	1	2	2	2	3	1	2	1	2	4	2	1	1	1	1	1	1	1	3	3	3	2	2	2	3	2	3	2	2	3	2	2	2	2	2	2	2	2	2	2	2	2	2	2	2	2	2	2
b6dacce4c309f20a	1	1	1	1	7	4	1	2	1	1	4	3	1	1	1	1	1	1	1	2	3	3	5	1	2	3	1	5	5	5	5	1	1	2	2	1	1	1	1	2	1	1	1	1	1	1	1	2	2
e65b785914768fdc	1	1	1	1	7	1	1	2	1	1	4	1	1	1	2	1	1	2	1	1	2	1	2	1	2	1	1	1	2	1	2	1	2	1	2	1	2	2	1	1	1	1	2	1	1	2	2	1	1
6932b6f5db45b84a	1	1	2	2	7	4	1	1	2	2	4	1	1	1	2	2	2	2	2	1	1	1	1	1	1	1	1	1	1	1	1	1	1	1	1	1	1	1	1	1	1	1	1	1	1	1	1	1	1
3b20e4604c7ed3b1	1	1	2	2	7	4	1	2	2	3	2	3	1	1	4	2	2	2	1	3	2	4	1	1	2	1	2	2	2	2	5	3	2	3	2	2	2	2	3	2	2	3	3	3	3	2	2	2	1
c90b94d00e1fb3dd	1	1	1	4	2	4	1	2	2	4	3	2	1	1	5	1	4	4	4	5	5	5	1	1	3	5	1	5	5	5	5	1	3	5	3	5	5	5	5	5	5	3	5	2	2	3	5	4	1
194052364a592433	1	1	1	1	2	4	1	1	2	4	4	2	1	1	3	1	2	2	2	5	4	5	1	1	3	4	2	2	2	3	3	3	3	3	2	3	3	2	2	3	3	2	2	3	3	2	2	2	2
fbe9f262ffc7c70a	1	1	2	1	3	4	1	1	2	4	4	1	1	1	2	1	2	1	1	1	1	2	1	1	1	1	1	1	2	1	4	1	2	1	1	1	2	2	4	1	2	2	2	2	2	4	3	2	2
15cb1722f5f176fe	1	1	1	1	2	1	1	2	1	4	2	1	1	1	3	1	1	1	1	1	1	1	1	1	1	1	1	1	1	1	1	1	1	1	1	1	1	1	1	1	1	1	1	1	1	1	1	1	1
82de812edbc657a6	1	1	1	1	3	1	1	1	1	2	2	2	1	1	3	1	1	1	1	1	1	1	1	1	1	1	1	1	1	1	1	1	1	1	1	1	1	1	2	1	1	1	1	1	1	1	1	1	1
a03a631d83f437d7	1	1	1	1	6	4	1	2	2	3	2	3	2	1	3	2	2	2	2	5	5	4	1	3	3	2	4	5	5	5	5	2	2	3	3	4	3	3	3	5	2	2	2	2	2	2	2	3	1
8edfa8ccdb9f0338	1	1	1	1	4	1	1	2	1	2	4	3	1	1	2	1	1	1	1	2	4	4	5	1	2	1	1	1	2	1	2	1	2	2	1	1	2	1	2	1	2	1	2	1	2	1	2	1	3
67b8a03c8edd4351	1	1	1	1	3	4	1	2	1	4	2	2	1	1	4	1	1	1	1	1	1	1	1	1	1	1	1	1	1	1	1	1	1	1	1	1	2	1	1	1	2	1	1	1	1	1	1	1	1
22f4b0478116e720	1	1	1	1	2	1	1	2	1	2	2	1	1	1	2	1	1	1	1	1	1	1	1	1	1	1	1	1	1	1	1	1	1	1	1	1	1	1	1	1	1	1	1	1	1	1	1	1	1
efb720904925e5e7	1	1	1	1	8	4	1	2	2	4	4	1	1	2	3	2	1	2	2	3	2	4	2	1	2	2	1	3	2	4	5	3	2	2	2	1	1	2	2	4	1	1	1	2	2	2	2	2	3
5c6d0163c0ef842a	1	1	1	1	1	2	2	1	2	1	4	1	1	2	7	1	1	2	1	1	2	1	1	1	1	1	1	2	1	1	2	1	1	2	1	1	1	2	1	1	1	2	2	1	1	2	2	1	1
bec2b4dc38ca754a	1	1	1	1	3	1	1	1	1	2	2	3	1	3	2	3	3	3	3	3	3	3	3	3	3	3	3	4	3	3	3	3	3	3	3	3	3	3	3	3	3	3	3	3	3	3	3	3	3
96d0097c5637b4f5	1	1	1	1	7	1	1	2	1	2	4	2	1	3	3	2	2	2	2	2	2	2	2	2	2	2	2	2	2	2	2	2	2	2	2	2	2	2	2	2	2	2	2	2	2	2	2	2	2
bff37e7c11491200	1	1	1	1	4	4	2	2	1	4	4	3	1	1	1	2	4	5	5	5	5	5	1	1	5	2	1	5	5	5	3	3	3	3	3	4	5	5	5	5	5	3	5	2	3	3	2	5	1
a5e8555e078a4083	1	1	2	1	7	2	1	2	2	1	4	2	1	1	2	1	4	4	4	3	3	3	3	1	1	4	1	4	4	4	4	3	4	4	4	1	3	1	1	1	1	1	1	1	1	1	1	2	2
d3e3bceb5197af8b	1	1	1	1	7	1	1	2	2	1	3	2	1	1	2	1	1	1	1	5	5	5	1	1	2	3	1	5	5	3	3	3	3	3	3	3	3	3	3	4	1	1	1	1	1	1	1	5	5
57ee3d6b0c22ffb8	1	1	1	1	7	3	1	2	1	1	4	2	1	1	1	3	5	5	4	5	5	1	1	1	1	1	1	5	5	5	5	5	5	5	5	2	2	5	5	5	4	2	2	2	1	1	2	1	1
1c149f08cabe3660	1	1	1	1	7	4	1	2	2	3	5	1	1	1	3	1	1	1	1	1	2	2	3	1	1	2	2	1	1	1	2	1	1	1	2	2	1	1	1	1	2	1	1	1	1	1	2	1	1
105e98dc3dfd0634	1	1	1	1	7	4	1	2	2	2	4	1	1	1	1	1	5	5	5	2	3	3	4	1	3	3	1	5	5	1	3	5	5	5	5	2	2	2	2	4	1	2	1	3	3	5	5	3	2
6a4eaeb0ccc6446d	1	1	1	1	8	4	1	2	1	3	4	3	1	1	1	1	1	1	1	1	1	1	1	1	3	2	2	5	5	5	5	3	3	3	3	2	2	2	2	2	2	2	2	1	1	1	1	2	2
6f5a59776cfa6882	1	1	2	1	8	3	1	2	1	1	4	1	1	1	3	1	2	2	3	4	4	1	3	1	2	2	2	4	3	1	2	2	3	2	1	2	2	1	1	2	3	1	1	2	3	1	1	2	3
6af6d64468dcae69	1	1	1	1	7	1	1	2	1	2	2	1	1	2	2	1	1	1	1	4	4	4	2	2	2	4	3	4	4	4	4	3	3	3	3	3	3	3	3	4	5	1	1	2	2	2	2	1	1
8370e029fa0c276d	1	1	1	1	7	3	1	2	2	2	3	1	1	1	1	3	3	3	3	3	3	2	3	3	3	3	3	3	3	3	3	3	3	3	3	3	3	3	3	3	3	3	3	3	3	3	3	3	3
8a0e49840f9a5caa	1	1	1	2	1	1	1	1	2	4	4	3	1	1	1	2	4	4	2	4	3	1	2	3	3	2	2	5	5	5	5	2	2	3	1	2	2	1	1	2	2	2	1	3	3	3	2	3	2
a62bfa69ec8f0bab	1	1	1	1	2	1	1	1	1	3	2	1	1	1	3	1	1	1	2	4	1	1	5	5	5	5	5	5	5	1	2	5	5	5	5	5	5	5	5	5	5	5	1	5	5	5	5	1	1
de1e38eb86d8fa69	1	1	2	2	3	2	1	1	2	2	4	1	1	1	2	1	1	1	1	4	4	3	3	1	1	3	1	1	2	2	2	2	2	2	2	2	2	2	2	1	2	2	2	1	2	2	2	2	2
95e96fe41f0f9460	1	1	2	2	4	2	2	2	1	1	2	1	1	1	3	2	2	2	2	2	2	2	3	2	2	2	3	2	2	2	2	3	3	3	3	2	2	2	2	2	2	2	2	2	2	2	2	2	2
2f7fcca222e89302	1	1	1	1	2	1	2	2	1	1	4	2	1	1	3	3	4	3	3	4	3	4	3	3	3	4	3	5	5	4	4	3	3	3	4	3	3	4	3	4	2	3	3	2	1	2	1	3	2
6d58530cbb8aae79	1	1	1	1	4	1	1	2	2	1	4	3	1	1	3	1	2	2	3	3	4	3	2	2	1	3	3	2	4	3	3	3	2	1	3	2	1	3	3	2	3	3	3	1	2	2	2	2	3
760b3cbc10997261	1	1	1	1	2	2	1	2	1	2	4	3	1	1	2	2	1	1	1	4	4	4	1	2	2	2	2	5	3	4	4	2	2	2	2	2	2	2	2	3	1	2	2	2	1	2	2	3	2
94f6e02b25b45ce0	1	1	1	1	7	1	1	2	1	1	4	1	1	3	2	1	3	3	4	2	3	4	4	1	2	3	2	4	3	2	3	4	3	4	4	2	3	3	2	4	2	3	2	3	2	4	2	4	2
d694acbbf03e9778	1	1	1	1	2	4	1	2	2	3	3	2	1	3	1	2	3	2	3	4	5	4	2	2	3	3	3	3	2	2	2	4	4	4	4	2	3	3	4	4	4	2	3	2	3	4	3	2	2
caf505abdf2e8824	1	1	2	1	6	3	1	2	2	3	2	3	1	1	1	1	2	2	2	4	5	5	1	1	2	5	2	5	5	5	5	1	2	2	1	1	1	2	5	4	4	2	1	1	1	1	1	1	1
ba72eaf6e06938c0	1	1	1	1	2	3	1	1	1	1	2	3	1	1	2	1	1	1	1	1	1	1	1	1	1	1	1	1	1	1	1	1	1	1	1	1	1	1	1	1	1	1	1	1	1	1	1	1	1
371534edefe1df99	1	1	3	3	4	3	2	1	2	3	3	1	1	1	2	1	5	3	2	2	2	4	1	1	4	2	5	5	3	1	3	1	2	2	5	1	3	5	1	1	1	1	2	4	5	3	1	1	1
e09b11b594f35ce1	1	1	1	1	2	4	1	2	2	3	2	3	1	1	5	2	3	2	2	4	5	1	1	2	3	5	2	5	5	5	2	2	2	3	3	4	4	4	2	5	5	4	5	2	2	3	4	1	1
9b1887c99e8ece3b	1	1	1	1	3	2	1	2	2	3	4	1	1	1	2	2	2	2	2	2	2	2	2	2	2	2	2	2	2	2	2	3	3	3	3	3	3	3	3	2	2	2	2	3	3	3	3	3	3
faaa8c736335f6a3	1	1	1	1	2	4	1	2	1	3	2	3	1	1	3	1	1	2	2	5	5	2	1	1	2	5	1	5	5	5	5	1	1	2	1	1	4	4	4	5	4	2	2	1	1	1	1	1	1
7d7f37564c944a9e	1	1	1	1	7	1	1	2	1	2	2	3	1	1	2	1	1	1	1	1	3	2	2	2	1	1	1	3	2	3	3	3	3	3	3	2	3	2	3	2	2	2	2	2	2	2	2	2	1
2a6f3df5c1a6b254	1	1	1	1	2	2	1	2	1	1	3	1	1	1	4	2	3	1	2	3	2	3	1	2	3	4	2	2	1	3	3	2	1	4	2	2	1	3	2	2	2	1	4	1	2	2	2	3	4
2de22edf8a6cda8c	1	1	1	1	3	1	1	2	2	1	2	3	1	1	5	1	1	1	1	4	2	5	1	1	2	2	2	3	3	3	4	1	2	2	2	1	3	3	3	5	4	3	4	1	2	2	3	1	2
2a993b361a53ff43	1	1	1	1	1	2	1	1	1	1	4	3	1	2	4	1	1	1	1	1	4	4	1	2	2	4	1	5	5	5	5	3	3	3	3	4	4	4	4	4	3	3	3	2	2	2	2	3	3
bc8c22fb813fa6ad	1	1	1	1	6	2	1	2	2	2	4	2	1	1	2	1	1	1	1	2	1	2	1	1	1	2	1	1	2	1	2	1	1	1	1	1	1	1	1	1	1	1	1	1	1	1	1	1	1
7ed3a7a8870056d0	1	1	2	2	3	2	1	1	1	1	4	1	1	2	2	1	1	1	2	2	3	4	4	2	1	3	2	2	3	2	4	3	3	2	2	2	2	1	1	1	2	2	2	1	2	2	1	2	2
c8e5b55bbb2d9927	1	1	1	1	7	3	2	1	1	2	3	1	1	1	4	1	1	1	1	1	2	1	2	1	3	2	1	1	2	1	1	1	1	1	2	2	1	2	2	1	2	1	1	1	1	2	2	1	1
9c88ca2cc4108e76	1	1	1	1	5	3	1	2	2	2	3	3	1	1	1	1	1	1	1	4	5	5	1	1	2	4	2	1	1	1	2	3	2	3	2	1	2	2	2	3	1	2	2	1	1	2	3	1	1
f14ba99bd47f3c93	1	1	2	2	2	1	1	1	1	1	2	1	1	2	2	2	1	2	2	2	1	1	1	3	3	4	1	5	5	5	5	3	1	1	1	2	2	2	2	1	3	1	1	1	1	1	1	1	1
5ea2dc63853f357a	1	1	2	2	2	3	2	1	1	2	4	1	2	1	3	1	1	1	1	2	2	2	2	2	1	4	5	1	2	1	2	1	2	2	2	1	2	2	1	1	3	3	3	1	1	1	1	2	2
20836e09f7ec2204	1	1	1	1	3	3	1	2	2	3	2	1	1	1	1	1	1	1	1	1	1	1	1	1	1	3	1	5	5	5	5	1	1	1	1	1	1	1	1	4	4	3	4	1	1	1	1	1	1
801ec23d9bedeffb	1	1	2	2	2	2	1	2	2	1	2	1	1	2	2	1	1	1	1	4	3	3	1	2	1	3	2	3	3	3	3	3	3	3	3	1	1	1	1	1	1	1	1	2	1	1	1	3	3
c6357d548346a9f1	1	1	1	1	3	2	1	1	2	1	4	1	1	2	2	1	2	2	1	1	1	2	1	1	2	1	1	1	2	1	1	1	1	1	1	1	2	1	1	1	2	1	1	2	1	1	2	1	2
dd9d0fc0a4e95ad7	1	1	2	2	6	3	1	2	1	1	2	3	2	1	4	1	2	3	1	2	1	3	1	1	3	3	2	1	2	3	3	1	2	1	2	1	3	1	3	1	2	1	5	4	5	1	2	1	1
75f4c8508d3c5772	1	1	2	2	4	2	1	1	2	2	2	1	1	2	4	1	1	1	1	3	5	5	1	1	2	3	4	1	2	1	3	4	5	5	1	2	2	2	1	1	1	5	5	1	2	4	1	1	1
2495b8212517dfd3	1	1	1	2	2	1	2	2	1	1	4	1	1	1	2	1	1	1	1	2	2	2	2	1	1	1	1	1	2	2	1	1	1	1	1	1	1	1	1	1	1	1	1	1	1	1	1	1	1
53a916ad60e20d7a	1	1	2	2	1	2	1	2	2	1	2	3	1	1	2	1	2	2	2	1	4	1	5	2	3	4	5	2	3	4	5	3	3	3	3	2	2	2	2	3	2	2	2	3	3	3	3	3	3
e437269f76da1f87	1	1	2	2	6	3	1	2	2	3	2	3	1	2	2	1	1	1	1	2	2	2	2	1	1	2	1	1	2	2	2	2	2	2	1	2	2	1	2	1	2	2	2	2	2	1	2	2	1
e8d8afd5dd769b8a	1	1	1	1	7	4	1	2	2	4	4	2	1	2	2	3	3	2	3	3	2	2	2	3	2	2	2	5	5	5	5	2	2	2	2	3	3	3	3	5	3	3	3	3	2	2	2	2	2
c3bdf6683f89ed8b	1	1	1	1	7	2	1	1	1	1	3	1	1	1	2	1	1	1	1	1	1	1	1	1	1	1	1	1	1	1	1	1	1	1	1	1	1	1	1	1	1	1	1	1	1	1	1	1	1
f3ffbb1cd38d5d28	1	1	2	2	6	2	2	1	1	2	4	1	1	1	2	2	2	2	2	2	2	2	2	2	2	2	2	2	2	2	2	2	2	2	2	2	2	2	2	2	2	2	2	2	2	2	2	2	2
85c4a0d6ccb7edab	1	1	1	1	2	3	1	2	1	2	4	3	1	2	2	1	1	1	1	2	2	2	2	2	3	3	3	4	4	3	3	1	2	2	2	2	2	2	3	4	3	2	2	2	2	2	2	2	2
77232b4708260f90	1	1	1	1	7	1	1	2	2	1	4	2	1	2	1	1	2	2	2	2	2	2	2	3	2	4	2	5	5	5	5	2	2	2	2	2	2	2	2	2	2	2	2	1	2	2	2	4	4
64a06255c8f8d810	1	1	1	1	3	1	1	2	1	2	2	2	2	1	2	2	1	2	1	3	4	5	2	2	2	3	1	3	4	3	3	2	2	2	3	2	2	2	2	3	3	1	1	1	1	1	1	1	3
249a5ded46c02265	1	1	2	2	2	2	2	1	2	2	3	1	2	1	5	4	3	4	3	3	4	5	3	3	3	4	1	4	2	3	5	4	1	4	3	4	3	4	1	4	1	4	2	3	5	2	3	4	2
d5ca2c25bf623bef	1	1	2	3	3	3	2	2	2	2	3	1	1	1	2	1	1	1	2	1	1	5	5	3	1	2	5	1	1	1	1	5	5	3	2	1	1	2	4	5	5	5	3	1	3	3	3	1	1
69b0dcd5bb178508	1	1	1	1	6	2	1	2	1	1	4	3	1	3	5	2	2	2	2	2	2	1	2	2	2	5	2	5	3	4	4	3	3	3	3	2	2	2	4	2	2	2	2	3	2	3	2	2	2
88f96430f44862e8	1	1	2	1	6	1	1	1	1	1	2	1	1	1	1	2	2	2	2	2	2	2	2	2	2	2	2	2	2	2	2	2	2	2	2	2	2	2	2	2	2	2	2	2	2	2	2	2	2
600f33a9b5c57e2a	1	1	2	2	4	2	1	2	1	2	3	1	1	1	4	1	1	2	1	2	1	2	1	1	2	2	1	2	1	2	1	1	2	1	1	2	1	2	2	1	2	1	1	1	2	1	1	2	1
aa21175a1c60f038	1	1	2	2	5	2	1	2	2	2	2	1	1	1	2	2	3	2	3	4	3	4	3	2	3	2	3	4	3	4	3	2	5	4	3	2	1	2	3	3	2	4	3	4	3	3	3	3	3
791d2f2b30f130a8	1	1	1	1	5	4	1	2	1	3	2	1	1	1	2	1	2	3	2	1	2	2	1	1	2	2	1	2	3	2	2	2	3	2	3	2	3	2	3	2	3	2	3	1	2	2	2	2	2
a4689197582e29f4	1	1	1	1	2	4	1	2	1	3	2	1	1	1	1	2	2	2	2	2	2	2	2	1	1	2	1	1	2	2	2	2	2	2	2	2	2	2	2	2	2	2	2	2	2	2	2	1	1
3b2aaffb391a2a85	1	1	2	2	5	3	1	2	2	3	4	3	1	1	2	1	2	2	4	1	1	2	2	1	2	3	3	1	1	1	1	2	2	2	2	1	2	2	2	1	1	1	1	2	2	2	2	1	2
6e6d3e72b7109ae3	1	1	1	1	8	1	1	2	2	2	3	1	1	3	1	1	1	1	2	3	5	5	1	3	2	5	4	5	4	4	3	3	3	3	3	3	4	3	3	4	3	3	3	2	2	2	3	2	2
fa7336472e0cb1ef	1	1	1	1	3	1	1	1	1	1	2	3	1	2	3	1	2	2	2	2	3	3	3	3	3	3	3	4	3	3	3	3	3	3	3	3	3	3	3	3	3	3	2	2	2	2	2	2	2
c3d3f2be7f5b052f	1	1	1	4	7	3	1	2	2	1	4	3	1	3	1	1	3	2	3	3	5	5	3	1	1	4	2	4	4	1	5	2	2	3	3	2	4	3	3	4	4	3	4	2	2	2	2	2	2
ca45e38bca4b717f	1	1	1	1	7	1	1	2	2	3	4	3	1	1	2	1	1	1	1	4	5	5	1	1	2	4	3	5	4	5	3	3	3	3	3	3	3	4	4	4	3	2	3	3	3	3	3	3	2
a16c9e3c5dd4b779	1	1	1	1	7	4	1	2	1	4	4	3	1	1	3	2	2	4	4	4	2	2	3	3	3	3	3	5	4	5	5	4	4	4	4	2	3	3	3	4	4	3	3	4	4	4	4	4	4
cfd0cab6430d4663	1	1	3	2	7	2	1	1	2	3	4	1	1	3	2	1	2	1	1	1	1	2	2	1	2	2	1	1	1	2	1	1	2	2	2	1	1	2	2	1	2	1	1	2	2	1	2	2	1
b53df816c0966580	1	1	2	2	4	3	1	2	1	1	5	2	2	1	1	1	2	1	2	1	3	2	3	1	2	1	2	1	2	2	1	1	2	3	2	1	3	2	3	1	2	1	3	1	2	3	2	1	2
3afe4e0b0b6c5d7d	1	1	3	2	1	4	1	2	2	4	3	1	1	2	3	1	2	1	1	2	3	4	2	2	2	4	2	2	2	2	2	2	2	2	2	2	2	2	2	2	3	3	2	2	2	2	2	2	2
a1f05ed0b7f73524	1	1	1	1	7	2	1	2	2	3	4	3	1	3	1	1	2	2	1	3	4	5	1	1	2	4	2	5	5	5	5	1	1	3	1	3	3	3	3	4	3	3	3	2	1	3	1	2	2
6803fe2c83ecf3a1	1	1	1	1	3	4	1	2	2	4	2	1	1	1	3	1	1	1	1	2	2	2	2	1	1	1	1	3	3	3	2	1	3	3	2	1	1	1	1	2	2	2	2	1	1	1	1	2	2
10fee54b8be26a8f	1	1	1	1	7	2	1	1	1	2	4	3	1	1	1	3	2	2	2	4	4	4	4	3	2	4	2	5	4	1	5	2	2	2	3	3	3	3	3	4	3	2	3	2	2	2	2	2	2
710fe492743881db	1	1	1	1	7	4	1	1	2	3	4	1	1	1	3	1	2	2	2	3	2	3	2	3	3	3	3	2	2	3	2	2	2	3	2	2	2	2	3	1	2	1	2	2	2	3	2	2	2
1f5ce00d3f211b90	1	1	1	1	7	1	1	2	1	1	4	3	1	1	8	2	2	2	2	4	2	3	3	3	3	4	2	5	5	5	5	3	3	3	3	2	2	2	2	2	4	3	2	2	2	2	2	3	2
7ba8da5004b97f01	1	1	1	2	8	4	2	2	2	4	4	2	1	1	1	2	5	5	5	4	3	1	1	1	1	1	1	5	5	5	5	5	5	5	5	1	1	1	1	1	1	1	1	5	5	5	5	5	5
f75d235484d3c325	1	1	2	1	2	2	1	2	1	1	4	1	1	1	3	1	1	1	1	2	4	3	1	1	3	1	1	3	3	3	3	1	2	1	2	1	1	1	1	2	2	1	1	1	1	1	1	2	1
9e0617a6666593e2	1	1	2	1	5	1	1	2	1	1	4	1	1	1	1	1	1	1	1	1	1	1	1	1	1	1	1	1	1	1	1	1	1	1	1	1	1	1	1	1	1	1	1	1	1	1	1	1	1
23c75c4378d6b06f	1	1	1	1	2	4	1	1	1	2	4	1	2	2	2	2	2	2	2	1	1	1	1	1	1	1	1	1	2	1	2	1	1	1	1	1	1	1	1	1	1	1	1	1	1	1	1	1	1
a9165c9b868cbb44	1	1	1	1	2	2	1	2	1	2	3	2	1	1	2	1	1	1	1	3	2	3	2	2	2	3	3	4	4	4	4	3	3	3	3	2	2	3	3	3	4	3	4	2	2	2	2	1	1
e945c82d17864b30	1	1	1	1	7	3	1	2	1	2	4	1	1	1	2	1	2	3	3	3	3	3	2	2	3	3	2	4	4	4	4	3	3	3	3	2	3	2	2	3	3	2	3	3	3	3	2	2	2
17ae02e3669a9456	1	1	1	1	3	3	1	1	2	2	3	2	1	1	2	2	1	2	2	2	2	1	2	2	1	3	2	2	1	3	2	2	4	3	2	2	3	4	4	3	2	2	2	2	2	2	2	2	1
17ae02e3669a9458	1	1	2	3	6	3	1	1	2	3	2	2	1	2	3	1	1	1	1	1	1	1	1	1	1	1	1	1	1	1	1	1	1	1	1	1	1	1	1	1	1	1	1	1	1	1	1	1	1
17ae02e3669a9459	1	1	2	1	2	3	2	2	2	2	1	2	1	1	5	1	1	1	1	1	1	1	1	1	1	1	1	1	1	1	1	1	1	1	1	1	1	1	1	1	1	1	1	1	1	1	1	1	1
17ae02e3669a9461	1	1	1	2	2	2	1	2	1	1	1	1	1	1	2	1	1	1	1	1	1	1	1	1	1	1	1	1	1	1	1	1	1	1	1	1	1	1	1	1	1	1	1	1	1	1	1	1	1
84fc5b65c9bcefa8	1	1	1	1	4	3	2	2	1	4	4	3	1	1	2	5	5	5	5	4	5	5	1	1	4	4	2	5	5	5	5	3	3	3	3	1	5	5	5	5	5	3	5	1	5	3	3	5	1
7d66461f7c845899	1	1	2	2	3	4	1	1	1	2	4	1	1	1	3	2	2	2	2	2	2	3	2	3	2	2	2	3	2	2	2	3	2	2	2	3	3	3	3	3	3	3	3	2	2	2	3	2	2
890775904d49cfaf	1	1	2	2	1	2	1	2	2	2	2	1	1	1	6	1	2	1	2	1	2	1	2	1	2	1	2	1	2	3	4	1	3	4	5	1	2	3	4	1	2	3	4	1	2	3	4	1	2
85b1479098236a98	1	1	2	3	7	2	1	2	1	1	2	3	1	3	2	2	3	2	3	3	3	4	2	3	2	3	2	4	3	3	3	1	1	1	1	2	2	2	2	2	3	2	2	2	2	2	2	2	2
4995c3a04164ad8b	1	1	1	2	1	2	1	2	1	2	2	1	1	1	4	1	2	3	4	1	2	3	4	1	2	3	4	1	2	3	4	1	2	3	4	1	2	3	4	1	2	3	4	1	2	3	4	1	2
f3b8d53f12510a29	1	1	1	2	1	2	1	2	2	3	2	1	1	1	4	1	2	3	4	1	2	3	4	1	2	3	4	1	2	3	4	1	2	3	4	1	2	3	4	1	2	3	4	1	2	3	4	1	2
2a742d1c7408ae7a	1	1	1	1	3	4	1	2	1	4	2	2	1	1	1	1	2	2	2	3	3	3	2	2	2	4	2	2	2	2	3	2	2	2	2	2	2	2	2	2	3	2	2	2	2	2	2	3	3
a10387f3ed2c64fd	1	1	3	1	4	2	1	1	2	1	4	1	1	1	7	2	3	3	3	2	2	3	3	3	3	4	4	2	2	2	3	3	3	4	4	3	3	4	4	2	2	3	3	3	3	3	4	3	3
7e36b19db4f8a935	1	1	2	1	7	2	1	2	1	4	2	3	2	1	2	1	1	1	1	1	3	1	1	1	1	3	1	3	1	1	3	1	1	1	1	1	1	1	1	4	3	3	3	2	2	2	2	1	1
1d70d7a69adf6596	1	1	1	1	1	4	1	2	1	4	2	3	1	1	2	1	1	1	1	1	1	5	1	1	2	1	1	3	2	4	4	1	1	1	1	1	2	2	2	3	2	2	3	1	1	2	2	1	1
2bc3b23a489739f2	1	1	2	2	2	2	2	2	2	2	4	2	2	1	1	4	4	3	4	1	2	3	4	1	2	3	4	1	2	3	4	1	2	3	4	1	2	3	4	1	2	3	4	1	2	3	4	1	2
8426b711ea6b1365	1	1	1	1	3	2	1	2	1	4	2	3	1	1	2	4	4	4	4	3	4	4	2	2	4	4	3	5	5	5	5	3	3	3	3	2	2	2	3	5	5	3	5	2	2	3	3	4	1
36ae154eebcdfb76	1	1	3	2	4	3	1	2	2	2	2	1	1	2	2	2	3	3	1	2	1	3	3	2	2	2	3	1	3	2	2	2	2	1	4	2	2	3	3	2	2	1	1	2	2	4	3	2	2
ac2c75e537091755	1	1	1	1	7	3	1	2	2	2	4	1	1	1	2	1	2	3	1	2	1	2	4	3	2	1	4	3	2	1	4	3	2	1	4	4	3	2	2	1	2	3	2	3	2	1	4	3	2
6fd590921e185234	1	1	1	1	7	3	1	2	2	3	2	3	1	1	2	2	3	3	4	3	2	2	2	3	3	2	2	2	2	2	2	3	3	3	3	2	2	2	2	2	2	2	2	3	3	3	3	3	3
4b50066cbbeddcbe	1	1	2	2	4	2	1	1	1	1	2	1	1	1	5	2	2	3	3	2	2	2	2	2	2	3	3	2	2	2	1	2	2	2	2	3	3	3	3	3	3	3	3	3	3	3	3	3	3
d393cc91f5ed3344	1	1	1	1	7	2	1	2	2	3	3	1	2	2	2	2	2	2	2	2	3	3	2	2	2	3	3	2	3	2	3	2	2	2	2	2	2	2	3	3	2	3	3	2	3	2	2	2	3
1aff47c909980330	1	1	3	2	7	4	1	2	2	2	4	1	1	1	2	1	1	1	1	1	1	1	1	1	1	1	1	1	1	1	1	1	1	1	1	1	1	1	1	1	1	1	1	1	1	1	1	1	1
acb540bb29062685	1	1	1	1	7	1	1	2	2	2	4	3	1	1	2	2	3	1	1	2	4	3	3	2	3	3	3	4	4	4	3	2	2	2	3	3	4	2	2	4	2	2	2	2	2	3	2	3	2
614ad9780f51fe0a	1	1	1	2	1	1	1	2	2	3	4	3	1	1	2	1	3	3	2	3	3	4	1	2	3	5	2	2	3	2	3	3	3	3	3	2	2	3	3	2	2	2	2	1	1	1	2	3	3
e0cb5d9d4a3515d2	1	1	1	1	7	2	1	2	2	2	4	2	1	2	4	1	3	3	4	5	4	4	1	1	3	4	3	5	5	5	5	1	2	2	5	5	4	3	3	3	4	3	4	2	2	2	2	2	2
80a8eeae7257c2b6	1	1	1	2	7	4	1	2	2	4	2	3	1	2	4	2	2	2	2	2	2	2	2	2	2	2	2	2	2	2	2	1	1	1	1	1	1	1	1	1	1	1	1	1	1	1	1	5	5
90f079f5b495a515	1	1	1	1	3	1	1	2	2	2	3	1	1	1	1	1	2	2	2	3	3	3	1	1	1	4	1	3	1	3	3	2	2	2	2	2	3	2	3	2	2	2	2	2	2	2	2	2	1
35297c27e8b6e61b	1	1	1	1	7	2	1	2	2	4	2	1	1	1	3	2	2	2	2	2	4	4	2	2	2	4	2	5	3	4	4	2	2	2	2	2	3	2	2	2	3	2	2	2	2	2	1	2	2
fc7c18a426fdc737	1	1	1	1	2	1	1	2	2	3	4	3	2	1	3	2	2	2	2	2	4	2	2	2	3	4	3	4	2	4	2	2	2	2	2	2	3	2	3	3	3	2	2	2	2	2	2	2	2
127d488c83319b60	1	1	1	1	4	1	1	2	2	2	4	1	1	1	2	1	3	2	2	2	2	1	3	2	3	2	2	3	3	2	4	2	3	2	1	3	2	3	3	2	3	3	2	1	2	2	1	1	4
1377c78a2f6c084a	1	1	1	1	8	1	1	2	1	3	4	1	1	1	1	1	1	1	1	2	1	1	2	2	1	1	1	2	2	2	2	1	2	1	1	2	1	2	2	2	1	1	1	2	1	2	1	1	2
0b3fa4740f9221fe	1	1	1	1	2	3	1	2	2	3	2	3	1	1	5	3	3	2	4	2	1	3	3	3	2	2	3	4	3	3	3	3	2	2	1	2	1	1	1	2	1	1	1	2	2	1	2	3	4
e47187ca24b5dd7f	1	1	1	1	7	1	2	1	2	1	3	2	1	1	1	2	4	4	2	2	4	4	2	3	3	4	3	5	2	4	4	4	3	2	3	2	3	3	3	3	3	3	3	2	3	4	3	1	2
198a84e470b1b1a4	1	1	1	1	4	2	1	2	2	4	2	1	1	1	1	2	2	2	3	4	4	2	2	2	2	4	2	4	4	4	4	2	3	3	3	2	3	2	2	3	2	2	2	2	3	3	3	4	4
0b94fee8cda2caa2	1	1	1	1	8	4	1	2	2	4	4	1	1	2	2	1	2	3	2	4	3	4	3	2	2	3	3	4	3	4	5	2	3	2	3	2	2	3	3	4	3	2	2	2	2	2	3	2	3
2f7d880aa733254b	1	1	3	1	6	2	2	2	2	1	3	1	1	2	2	3	3	3	3	3	3	3	2	3	3	3	2	3	3	3	3	3	2	2	2	3	3	3	3	3	3	3	3	3	3	3	3	3	3
332bce3bb25ccad8	1	1	3	3	3	4	1	2	2	4	2	2	2	1	6	1	1	1	1	1	1	1	1	1	1	1	1	1	1	1	1	1	1	1	1	1	1	1	1	1	1	1	1	1	1	1	1	1	1
2a86cdd16a1b5d64	1	1	3	3	3	2	1	2	1	2	2	2	1	2	2	2	2	2	2	2	3	3	3	2	3	3	3	2	3	3	3	2	3	3	3	2	3	3	3	2	3	2	2	2	2	2	2	2	2
3b46e3a4a7aa29da	1	1	1	1	7	3	1	2	2	2	4	2	1	1	3	2	2	2	2	2	2	2	2	2	2	2	2	2	2	2	2	2	2	2	2	2	2	2	2	2	2	2	2	2	2	2	2	2	2
3fae84108fcfd82e	1	1	1	2	4	2	1	2	2	3	2	2	2	1	2	2	4	3	4	2	3	5	1	1	2	5	1	2	1	3	1	2	2	1	2	2	2	2	2	3	2	2	2	2	2	2	2	5	3
3387fbbe60ec407e	1	1	3	2	1	1	1	2	1	1	2	1	1	1	2	2	1	2	2	2	2	1	2	2	2	1	1	2	2	1	2	1	2	1	2	2	1	2	2	1	1	2	2	1	1	2	1	2	2
352f44bfeedf96ea	1	1	1	1	3	2	1	2	2	2	2	2	1	1	2	1	3	3	4	4	5	5	1	3	4	4	5	5	5	5	5	2	3	3	3	1	5	2	4	4	2	2	2	3	3	5	2	1	1
c1694e0dbf377ab0	1	1	2	2	3	1	1	1	2	3	2	1	1	1	3	3	3	3	3	3	3	3	3	3	3	3	3	3	3	3	3	3	3	3	3	3	3	3	3	3	3	3	3	3	3	3	3	3	3
1ef4baeaa8c905be	1	1	2	2	3	2	1	1	2	3	2	1	1	1	2	3	3	3	3	3	3	3	3	3	3	3	3	3	3	3	3	3	3	3	3	3	3	3	3	3	3	3	3	3	3	3	3	3	3
9289db522e0c8205	1	1	2	3	1	2	1	1	2	2	3	1	1	1	6	3	3	3	3	3	3	3	3	3	3	3	3	3	3	3	3	3	3	3	3	3	3	3	3	3	3	3	3	3	3	3	3	3	3
e4382cf0e21ecddd	1	1	2	1	1	2	1	1	2	2	2	1	1	1	1	3	3	3	3	3	3	3	3	3	3	3	3	3	3	3	3	3	3	3	3	3	3	3	3	3	3	3	3	3	3	3	3	3	3
e03aaf9e0ec04000	1	1	2	2	3	4	1	1	2	2	4	1	1	2	2	1	2	4	3	2	2	1	3	2	1	3	2	3	4	2	1	3	2	1	1	3	1	2	4	2	2	1	2	2	2	1	3	1	1
5cbae2208ba83707	1	1	3	2	7	2	1	2	2	2	4	1	2	1	2	2	3	2	2	2	3	4	2	2	2	3	2	2	3	2	3	3	2	3	3	2	2	3	1	2	2	2	1	3	2	3	3	3	2
23211674b37e3d16	1	1	1	1	7	4	1	1	2	3	2	1	1	1	3	1	2	2	2	1	2	3	1	2	3	5	1	2	2	2	2	2	3	2	1	1	1	1	2	1	1	1	1	2	2	3	2	3	4
189436133316545b	1	1	1	1	3	2	1	2	2	1	4	2	1	1	1	3	3	3	3	3	3	2	2	2	2	3	3	3	3	2	2	4	4	3	3	3	3	2	3	4	3	4	3	2	2	3	3	1	1
f9b7d2fde94e6108	1	1	2	1	2	3	1	2	2	1	2	2	1	1	4	1	2	2	3	2	4	3	1	1	2	1	3	3	3	4	4	1	1	1	1	2	2	2	2	2	2	2	2	1	1	1	2	2	2
aac3f8f4ed239fab	1	1	1	1	7	2	2	2	1	2	4	1	1	1	4	1	1	1	1	1	1	1	1	1	1	1	1	1	1	1	1	1	1	1	1	1	1	1	1	1	1	1	1	1	1	2	1	1	2
214102a5298850eb	1	1	1	1	5	3	1	2	1	2	4	2	1	1	5	1	2	2	2	2	4	4	2	2	3	4	1	2	4	2	2	2	2	2	2	2	2	2	2	2	2	4	4	2	2	4	4	2	2
ae3b1093d09d0bc9	1	1	1	2	1	4	1	2	1	2	3	2	2	1	7	1	1	1	1	4	5	3	1	2	2	4	2	4	4	3	4	2	2	3	3	1	1	1	1	2	2	2	2	1	1	3	3	3	4
ea4d22fb28794bf1	1	1	1	2	7	2	1	2	1	2	4	3	1	2	1	2	1	1	2	4	4	4	4	1	4	2	2	4	4	3	3	3	3	3	3	2	2	2	2	3	2	3	2	2	2	3	2	3	2
c7a7c1dc736d07b5	1	1	3	2	2	2	1	2	1	2	4	2	2	2	3	2	2	3	2	2	2	3	3	2	3	2	2	2	2	3	3	3	2	2	3	2	2	3	3	2	3	2	2	2	2	3	2	2	2
62d7d24690785b5e	1	1	1	1	2	2	1	2	1	2	2	1	1	1	7	1	1	2	2	1	1	2	2	1	1	2	2	1	1	2	2	1	1	2	2	1	1	2	2	1	1	1	1	1	1	1	2	1	1
45b88557f14ffdfb	1	1	2	1	3	1	1	1	2	3	4	1	1	1	4	1	1	1	1	1	1	1	1	1	1	1	1	1	1	1	1	2	2	2	2	2	2	2	2	2	2	2	2	2	2	2	2	2	2
12c7315d6f818c77	1	1	1	1	7	4	1	2	2	4	4	2	1	1	2	1	2	2	3	3	2	2	2	2	2	2	2	3	3	3	3	4	4	3	3	2	2	2	2	2	2	2	2	2	2	2	2	3	3
b85b96730a82c327	1	1	1	1	7	4	1	2	2	3	5	2	1	2	4	2	2	2	2	2	3	3	2	2	3	3	4	2	3	2	2	3	3	3	3	2	3	3	3	2	2	3	2	2	2	2	2	3	3
22292ef00d9948c0	1	1	1	1	7	3	1	1	2	3	4	2	1	1	1	3	3	2	3	4	3	4	2	4	2	5	2	4	4	4	4	3	2	2	2	3	3	4	2	3	1	2	2	3	2	2	2	3	4
7633ddab9cabbe51	1	1	3	2	7	4	2	1	2	2	5	2	1	1	6	2	2	2	2	2	1	1	2	1	1	2	3	1	1	2	2	1	2	1	2	2	2	1	1	1	2	3	4	2	2	2	1	1	1
a5ada9b6f2710593	1	1	1	1	7	2	1	2	1	1	3	3	1	2	3	1	1	1	1	5	5	4	2	2	2	4	2	5	5	5	5	4	4	4	5	2	5	4	5	4	4	3	4	2	2	2	3	2	2
da6c67a9d3972a3b	1	1	3	4	7	4	1	2	2	2	3	2	1	3	1	2	2	2	3	2	4	5	1	1	1	4	1	4	2	4	5	1	2	2	2	1	2	2	4	3	1	2	1	1	1	3	1	4	2
f95e87072d7607d3	1	1	1	2	3	2	1	1	2	2	2	1	1	1	5	3	3	3	3	3	3	3	3	3	3	3	3	3	3	3	3	3	3	3	3	3	3	3	3	3	3	3	3	3	3	3	3	3	3
b5cfb67821a065d8	1	1	2	2	5	3	1	1	2	3	3	1	1	1	6	3	3	3	3	3	3	3	3	3	3	3	3	3	3	3	3	3	3	3	3	3	3	3	3	3	3	3	3	3	3	3	3	3	3
00a008e4717951f4	1	1	2	2	1	2	1	1	1	1	3	2	1	1	4	1	1	1	1	2	2	2	1	1	1	5	1	3	3	3	3	1	1	1	1	2	2	2	2	2	2	2	1	2	2	2	2	1	1
3f8c6155ebbc37c5	1	1	1	1	7	3	1	2	2	3	3	3	1	1	4	2	2	2	2	2	2	2	2	2	2	2	2	2	2	2	2	2	2	2	2	2	2	2	2	2	2	2	2	2	2	3	2	2	2
753dd7ff3ab2217c	1	1	1	1	7	4	1	2	2	4	4	1	1	1	2	2	4	3	4	4	5	4	1	2	1	4	2	4	2	4	4	2	2	2	2	4	4	2	2	3	2	2	3	2	1	3	3	2	2
6098b9c39813fe56	1	1	1	2	2	2	1	2	1	1	4	2	1	1	1	1	2	2	2	3	4	4	2	2	3	3	2	4	4	4	4	3	3	3	3	2	2	2	2	3	3	2	2	2	2	3	2	3	3
f53673a42a44a4ad	1	1	3	2	1	3	2	1	2	1	4	1	1	1	4	1	1	1	1	3	5	5	5	1	1	3	2	1	1	1	1	1	1	1	1	1	1	1	1	3	2	2	2	1	1	1	1	3	5
ea9f5a09b15a8efc	1	1	1	1	7	3	1	2	2	3	4	1	1	1	3	1	2	2	2	2	1	2	2	2	2	1	2	2	2	2	2	2	2	2	2	2	1	2	3	2	2	2	2	2	1	2	2	1	2
4ddbd7833594366c	1	1	3	1	1	3	1	1	2	1	2	1	1	1	4	1	1	1	1	1	1	1	1	1	1	1	1	1	1	1	1	1	1	1	1	1	1	1	1	1	1	1	1	1	1	1	1	1	1
f98300262d72e9ae	1	1	2	2	4	2	1	2	2	3	4	1	1	1	2	1	1	1	1	5	5	5	1	1	1	1	1	1	1	1	1	1	1	1	1	1	1	1	1	1	1	1	1	1	1	1	1	1	5
249dba3eb9557232	1	1	1	1	3	2	1	2	2	2	4	1	1	1	2	2	2	2	2	2	2	2	2	2	2	2	2	2	2	2	2	2	2	2	2	2	2	2	2	2	2	2	2	2	2	2	2	2	2
f277ec8628953049	1	1	1	1	2	2	1	1	2	1	1	2	2	1	7	4	5	4	5	1	1	4	1	1	1	1	2	1	2	2	1	1	5	4	5	1	1	2	1	2	1	1	2	1	2	3	5	1	2
e734fb33af0965a0	1	1	1	1	3	1	2	2	2	1	2	2	1	1	2	1	1	1	1	1	1	1	1	2	2	2	2	1	2	3	2	3	2	2	2	2	3	2	3	5	2	2	2	2	2	2	2	4	5
4ee4c80dca43d787	1	1	1	1	3	3	1	1	2	3	2	1	1	1	2	1	2	2	2	3	2	2	2	2	2	3	2	4	3	3	4	2	2	2	2	2	2	2	2	3	3	2	2	2	2	2	2	2	2
46c8d2b5a08b44cd	1	1	2	2	3	2	1	1	1	2	4	2	2	1	2	2	2	2	2	3	2	2	3	3	2	3	3	3	2	2	2	3	2	2	3	3	3	4	4	3	4	4	4	4	3	3	3	3	4
92dba55914cc1947	1	1	1	2	7	2	1	2	1	2	4	2	1	2	1	2	2	2	2	4	3	4	2	1	3	4	1	4	4	4	3	3	3	3	3	2	2	3	2	3	2	3	2	3	2	4	2	3	2
a9e9719a5bd35fe9	1	1	2	2	7	4	1	2	2	2	4	1	1	1	2	2	2	2	2	2	2	2	2	2	2	2	2	2	2	2	2	2	2	2	2	2	2	2	2	2	2	2	2	2	2	2	2	2	2
ee2ee251da05cb98	1	1	2	2	7	3	1	2	2	3	3	1	2	1	2	2	2	2	2	2	2	2	2	2	2	3	2	2	2	2	3	2	2	2	2	2	2	2	2	3	2	2	2	2	2	2	2	2	2
877ec9a7512c7a94	1	1	1	1	7	2	1	2	2	4	2	1	1	1	1	2	2	2	3	2	4	4	2	1	2	4	2	5	4	4	4	2	2	1	2	2	2	1	2	2	3	2	2	2	1	2	2	2	2
189ae2200d2dacbe	1	1	3	3	1	3	1	2	1	2	2	2	1	2	1	1	5	5	1	1	3	2	2	4	3	2	1	3	2	1	1	4	3	2	1	4	3	2	1	1	2	3	4	1	2	3	4	1	2
69047671d53f11c9	1	1	2	2	2	3	2	1	2	2	2	2	1	1	1	1	2	3	3	3	3	3	3	4	4	4	4	3	3	2	2	5	4	3	3	4	3	3	3	4	3	3	3	5	4	3	3	1	2
0088ef14b9582d6e	1	1	1	1	4	3	1	2	1	2	3	2	1	1	1	1	1	1	1	1	4	4	1	3	4	1	1	5	5	5	5	2	2	2	2	1	1	1	1	4	3	1	2	1	1	1	1	2	2
5f74659eab4b255e	1	1	1	1	3	3	1	1	2	3	4	1	1	1	4	1	1	1	1	1	1	1	1	1	1	1	1	2	2	2	2	2	2	2	2	2	2	2	2	2	2	2	2	2	2	2	2	2	2
3ab4dbc4856fbb27	1	1	2	1	1	4	1	2	1	4	2	2	1	1	3	1	1	1	1	1	1	1	1	1	1	5	1	5	2	4	4	1	1	1	1	1	1	1	1	2	2	2	2	1	1	1	1	1	1
3e70f464604018b1	1	1	1	1	7	4	1	2	2	4	4	2	1	1	3	2	3	2	2	3	2	2	2	2	2	3	2	3	3	3	4	3	3	3	3	2	2	2	2	2	2	2	2	2	2	2	2	3	3
4e18fe9fe43f22c0	1	1	3	1	7	2	2	1	1	2	4	1	1	1	1	1	1	1	1	1	1	1	1	1	1	1	1	1	1	1	1	1	1	1	1	1	1	1	1	2	2	2	2	2	2	2	2	2	2
6c429fe0a9fde341	1	1	1	1	3	2	1	2	2	1	4	1	1	1	4	2	2	1	1	2	2	3	3	1	2	2	2	2	2	2	2	1	2	2	2	2	2	1	1	2	2	2	3	2	2	1	1	2	2
be3cdcca7f262229	1	1	1	1	7	3	1	2	2	3	2	2	1	3	2	3	4	5	5	3	3	4	3	1	1	1	1	2	2	2	2	3	3	3	3	3	3	3	3	3	3	3	3	4	3	3	3	4	4
d48f1470f22acf02	1	1	1	1	2	1	1	2	2	1	4	2	2	1	5	3	3	3	3	3	3	3	3	2	3	3	3	3	3	3	3	2	2	3	3	2	3	3	1	3	3	3	3	2	2	2	2	3	3
7d260d1a5044ea55	1	1	1	1	2	1	1	2	1	2	2	1	1	1	3	1	1	1	2	1	1	1	2	1	1	1	2	1	1	1	2	1	1	2	2	1	1	2	2	1	1	2	2	1	1	2	2	1	1
a28b436f475cba42	1	1	2	2	3	3	1	2	2	2	3	1	2	2	4	2	2	3	2	1	3	3	2	2	2	3	1	1	2	2	3	3	3	3	2	2	2	3	4	4	4	3	2	1	2	2	3	2	2
863d69276a8bf837	1	1	1	1	7	4	1	1	2	4	2	1	1	1	1	1	1	1	1	1	1	1	1	1	1	1	1	1	1	1	1	1	1	1	1	1	1	1	1	1	1	1	1	1	1	1	1	1	1
e3a301d365de5b40	1	1	1	1	5	2	1	1	1	2	4	2	1	1	1	1	2	2	2	2	2	2	1	2	2	2	2	5	5	5	5	2	2	2	2	2	2	2	2	4	2	3	2	3	3	3	3	2	1
d91a1b2bda86dd52	1	1	3	2	2	2	1	1	1	2	4	2	2	2	3	2	2	3	3	2	3	2	2	2	2	3	3	2	2	3	2	3	2	2	3	2	3	2	3	2	2	3	3	2	2	3	2	3	2
5038ba2268a321ee	1	1	1	1	7	4	1	2	2	3	4	1	1	1	4	2	1	2	2	2	2	2	2	2	1	2	2	2	2	2	3	2	2	2	2	2	2	2	2	2	2	2	2	2	2	2	2	1	1
631aa28d3ecae556	1	1	1	1	1	2	1	1	1	2	2	1	1	1	7	1	2	1	2	1	2	1	2	1	2	1	2	1	2	3	4	1	2	3	4	1	2	3	4	1	2	3	4	1	2	3	4	1	2
2ae7cf9daeb6d194	1	1	3	2	7	2	1	2	2	2	4	1	2	1	2	2	2	3	2	2	3	4	2	2	2	3	2	2	2	3	4	3	2	3	3	2	2	2	1	2	2	2	1	2	2	2	3	4	3
3917f350f96f9ca1	1	1	1	1	1	1	1	1	2	2	2	1	1	1	3	1	2	1	2	1	2	1	2	1	2	1	2	1	2	1	2	1	2	1	2	1	2	1	2	1	2	1	2	1	2	1	2	1	2
95faea075d89047a	1	1	3	1	7	3	1	2	2	2	4	3	1	1	4	1	1	1	1	4	4	3	2	2	2	4	2	5	5	5	5	5	3	3	3	3	4	2	2	4	4	2	3	2	2	2	2	2	1
60df5b416850f3c2	1	1	1	1	3	2	1	2	2	4	2	2	1	1	3	2	2	2	2	2	2	2	2	2	2	2	2	4	4	2	2	2	2	2	2	2	2	2	2	2	2	2	4	2	3	2	4	2	2
ac48b4210c05206b	1	1	1	1	2	3	1	2	1	1	4	1	1	1	2	1	1	1	1	1	2	2	1	2	2	2	1	2	1	4	2	2	2	2	2	2	1	2	2	1	1	2	2	2	1	2	2	2	2
bca1970532ab0fd1	1	1	1	1	3	2	1	2	2	2	3	2	1	1	2	1	2	2	2	3	3	3	2	2	2	4	2	2	1	2	3	2	2	2	2	2	2	2	2	2	2	2	2	2	2	2	2	1	1
401bcdc9128c5106	1	1	1	1	3	4	1	2	1	4	2	3	1	1	2	1	2	2	1	3	2	2	2	2	2	2	2	1	1	1	2	1	1	1	1	1	3	2	2	1	1	1	1	1	1	1	1	2	2
5451fbe669ce7be1	1	1	1	2	7	1	1	2	1	1	2	3	1	1	3	2	2	2	3	3	4	3	3	2	2	2	2	4	3	3	3	2	2	3	3	2	2	2	2	2	2	1	3	1	1	2	2	2	2
acd57cccaaeb7c38	1	1	1	1	7	4	1	2	2	4	4	1	1	1	2	2	4	4	4	4	4	4	1	2	2	4	2	4	4	4	5	2	2	3	3	2	3	2	2	3	2	2	2	1	2	2	2	2	2
b5e174c8279e4b6f	1	1	2	2	3	2	1	1	2	1	4	2	1	2	2	1	2	2	3	2	2	1	3	3	2	1	2	2	3	1	2	2	3	2	1	2	1	2	1	1	1	2	2	2	3	2	1	1	1
233278a99fdf3abb	1	1	1	1	4	4	2	2	1	4	4	3	1	1	2	3	5	5	5	4	5	5	2	1	5	2	2	5	5	5	2	3	3	3	3	4	5	5	5	4	5	3	5	1	2	4	3	5	1
3c86b02f34c0c477	1	1	3	2	1	1	1	2	1	1	2	1	1	1	2	1	1	2	2	1	3	2	3	1	2	2	1	2	2	2	1	2	1	2	2	2	2	1	2	2	2	1	2	2	1	2	1	2	1
895edee7cca4e9a5	1	1	1	1	7	4	1	2	2	3	2	3	1	1	3	2	4	3	3	3	4	3	2	2	3	4	2	4	3	4	4	2	2	2	2	4	3	4	3	4	3	3	2	3	2	2	3	3	2
513fb870fe040424	1	1	1	2	3	2	1	1	2	2	2	1	1	1	5	3	3	3	3	3	3	3	3	3	3	3	3	3	3	3	3	3	3	3	3	3	3	3	3	3	3	3	3	3	3	3	3	3	3
159db06bddbfd6b7	1	1	1	1	8	4	1	2	2	4	4	1	1	2	2	1	2	2	1	2	4	5	2	3	2	3	3	5	3	5	5	2	2	3	3	2	1	3	3	4	3	3	2	2	1	2	2	2	2
f88c58735e21a1f3	1	1	2	2	4	2	1	1	2	3	3	1	1	1	2	3	3	3	3	3	3	3	3	3	3	3	3	3	3	3	3	3	3	3	3	3	3	3	3	3	3	3	3	3	3	3	3	3	3
2a85f71424a754af	1	1	1	2	6	2	1	1	2	2	2	1	2	2	1	3	3	3	3	3	3	3	3	3	3	3	3	3	3	3	3	3	3	3	3	3	3	3	3	3	3	3	3	3	3	3	3	3	3
557adfb8671609b7	1	1	3	3	2	3	2	1	2	3	3	2	1	2	4	3	3	3	3	3	3	3	3	3	3	3	3	3	3	3	3	3	3	3	3	3	3	3	3	3	3	3	3	3	3	3	3	3	3
bc98ba2cd40e7f4b	1	1	2	2	4	3	1	1	2	2	2	2	2	2	3	3	3	3	3	3	3	3	3	3	3	3	3	3	3	3	3	3	3	3	3	3	3	3	3	3	3	3	3	3	3	3	3	3	3
57792329a31243f7	1	1	2	3	4	3	1	1	2	2	2	2	1	2	5	3	3	3	3	3	3	3	3	3	3	3	3	3	3	3	3	3	3	3	3	3	3	3	3	3	3	3	3	3	3	3	3	3	3
53874faab300e212	1	1	3	2	1	2	1	1	1	1	4	2	1	1	4	1	1	1	1	2	3	3	2	1	1	4	1	4	4	3	3	3	3	3	3	2	2	2	2	2	2	2	1	1	1	1	1	2	1
aaba98f64298865d	1	1	1	1	3	4	1	1	2	3	2	1	1	1	5	1	2	2	2	3	2	2	2	2	2	3	2	4	4	3	4	2	2	3	3	2	2	2	2	2	3	2	2	2	2	2	2	2	2
419355d53042ec01	1	1	1	1	3	2	1	2	1	4	2	3	1	1	2	5	5	5	5	3	4	4	2	2	4	4	4	4	4	4	4	3	3	3	3	2	2	2	3	4	4	3	4	2	2	2	2	3	2
d0c94b10334dcd0e	1	1	2	1	7	1	1	1	2	1	3	2	1	1	2	2	1	1	1	4	5	4	4	2	2	4	3	4	3	2	4	4	5	5	5	4	2	2	2	4	2	2	2	2	2	2	4	2	2
52ec83da3f238944	1	1	1	1	7	2	1	2	2	3	5	2	1	1	4	2	2	2	2	2	2	2	2	3	3	2	3	2	3	3	3	3	3	3	2	3	3	3	3	2	3	3	2	3	3	3	3	2	3
eb2741212e28db69	3	1	1	2	7	4	1	2	1	2	2	2	1	1	3	2	3	2	2	2	3	3	3	4	3	3	2	4	3	2	3	4	3	3	3	4	2	2	2	4	5	2	2	4	1	1	2	1	2
fc8c95f9cb56cea3	3	1	1	1	7	4	1	2	1	2	2	2	1	1	3	1	2	3	2	4	4	4	3	3	3	3	3	5	4	4	3	2	2	2	2	2	4	3	2	4	4	3	3	2	2	2	2	2	2
28a1f0d4ba49d673	3	1	1	1	7	2	1	2	2	1	4	1	1	1	2	2	2	2	1	3	2	3	3	2	2	3	2	3	4	4	3	2	2	3	3	3	3	2	2	2	3	2	2	2	2	2	2	2	3
ddf27722052f305c	3	1	1	2	7	4	1	1	1	3	1	2	1	2	4	1	5	1	5	3	1	1	5	1	1	1	1	5	5	1	1	3	3	3	3	1	1	1	1	1	1	1	1	1	1	1	1	5	5
cfebd4f7dca15dba	3	1	1	1	7	4	1	2	1	3	2	2	1	1	7	1	5	5	5	4	5	5	3	2	1	1	5	5	5	3	5	1	1	1	1	1	5	3	3	5	5	2	2	4	3	1	2	1	1
d46d7f13011dffba	3	1	1	2	7	4	1	2	2	1	4	3	1	1	1	1	3	1	4	3	4	4	1	1	2	4	5	5	4	4	3	3	3	4	3	2	4	2	2	3	2	2	2	3	2	3	2	2	4
4cd0929a7f83c861	3	1	1	1	2	1	1	2	2	2	2	3	1	3	2	2	2	2	2	2	2	2	2	2	2	4	4	5	5	5	5	2	2	3	3	3	4	4	4	4	3	3	3	3	3	3	3	3	1
95a85303e323256e	3	1	1	1	3	4	1	2	1	4	4	2	1	2	3	3	3	3	4	3	3	3	3	3	3	3	3	4	4	4	4	3	3	3	3	3	3	3	3	4	4	2	2	3	3	3	3	3	3
607ad04e021b7cc6	3	1	1	2	7	3	1	1	2	4	5	1	1	2	7	2	4	4	5	3	2	2	3	3	3	2	2	4	3	4	3	3	2	4	3	2	2	2	3	3	3	2	2	3	2	2	2	3	3
b4f468b5118568ce	3	1	3	3	7	1	1	2	1	3	2	3	1	2	3	3	5	5	5	2	2	3	3	1	4	3	3	5	5	5	3	2	3	1	2	4	1	2	3	3	3	3	3	2	1	2	1	3	4
cfc1177fe928565d	3	1	3	3	7	3	1	1	1	3	4	1	1	1	3	1	1	2	1	1	1	1	2	1	1	2	2	1	1	2	1	1	1	1	2	1	1	2	1	1	1	1	1	1	1	1	1	1	1
541fe5f66d1ce785	3	1	3	1	1	2	1	2	2	1	2	3	2	1	3	1	1	1	1	2	2	2	2	1	2	1	5	2	2	1	1	1	1	2	2	1	3	2	3	1	5	2	2	2	2	2	1	1	3
0e68f6b10c5730b4	3	1	1	1	2	3	1	2	1	3	2	3	1	3	2	1	4	4	2	5	5	5	1	5	1	5	5	5	5	5	5	1	1	5	5	5	5	5	5	5	5	5	5	5	1	1	5	1	1
8bf588e6c9e14c09	3	1	1	1	7	1	1	2	2	1	4	3	2	3	3	1	2	1	2	2	1	1	2	1	1	1	1	4	4	2	2	1	1	1	1	3	3	1	1	1	1	1	1	1	1	1	1	1	4
9242cde73ab410e8	3	1	1	2	2	3	1	2	1	2	2	1	1	2	3	2	1	2	1	1	2	1	1	1	2	2	2	2	3	2	2	3	2	3	4	2	3	1	2	2	3	1	3	2	2	2	2	4	4
c9cb146cdd5c1319	3	1	1	1	7	4	1	1	1	4	4	1	1	2	4	2	4	4	4	2	4	4	2	3	2	1	4	2	4	4	2	4	4	4	4	2	2	2	2	4	1	1	1	2	2	2	2	4	4
450b91c5f0235780	3	1	1	1	7	2	1	1	2	1	2	2	1	1	2	2	2	2	2	3	3	3	3	2	2	3	3	4	4	4	4	3	3	3	3	3	3	3	3	3	3	3	3	3	3	3	3	3	3
b30bbb0445978fa7	3	1	1	1	7	4	1	2	1	3	4	2	1	2	3	2	4	4	4	3	4	3	2	2	3	3	3	3	4	4	4	2	2	3	3	3	3	2	2	4	1	2	1	2	2	2	2	1	2
db3d1726409650fc	3	1	1	1	2	3	1	2	2	4	1	2	1	1	3	2	2	2	2	2	2	2	2	2	2	2	2	2	2	2	2	2	2	2	2	2	2	2	2	2	2	2	2	2	2	2	2	2	2
4dbf2b4c4adc49b1	3	1	1	2	8	1	1	1	1	1	4	1	1	1	5	3	2	3	4	2	1	2	3	1	2	3	4	2	2	2	3	2	2	3	4	2	2	2	2	2	1	2	1	2	2	2	2	3	4
7ebcc0d2a933cb0b	3	1	1	2	3	4	1	2	1	2	2	2	1	1	3	2	3	3	5	3	4	4	3	2	3	3	3	5	5	2	3	3	4	4	4	3	4	3	3	3	3	3	3	3	2	3	3	3	2
c35e823e33488499	3	1	1	1	7	3	2	2	2	1	3	3	1	1	2	2	2	2	2	2	2	2	2	2	2	3	5	4	4	3	3	2	2	2	2	2	4	3	3	3	3	3	3	2	3	3	3	2	2
135e48b8eaae6b51	3	1	1	1	7	4	1	2	2	4	2	3	1	1	3	2	3	3	4	2	3	3	3	3	3	3	3	4	4	4	5	4	4	4	4	3	4	4	4	4	4	4	4	2	2	2	2	1	1
a9181113b8839093	3	1	1	2	7	1	1	2	1	3	4	2	1	1	3	1	3	3	3	5	5	5	1	1	1	5	5	5	5	5	5	3	3	3	3	1	5	4	4	4	2	1	1	2	2	5	1	1	1
439aa14007905d4f	3	1	1	2	7	1	1	1	1	2	4	3	1	1	1	2	2	2	2	2	4	2	3	2	4	3	5	2	2	3	3	2	2	2	2	3	2	2	2	5	2	2	2	2	2	2	2	2	2
89c6c7d84f873bc4	3	1	1	1	2	4	1	2	2	3	2	3	1	1	4	1	2	2	4	3	2	4	2	1	2	2	4	4	4	3	3	3	3	3	2	2	3	2	2	2	2	2	2	2	2	2	2	4	4
0e8a1c87d58445f4	3	1	1	1	7	4	1	2	2	2	4	1	1	1	2	2	3	3	3	2	2	2	2	2	2	3	3	2	4	4	4	3	3	3	3	3	3	2	2	2	2	2	2	2	2	2	2	4	4
cc4e95ffb9510a60	3	1	1	2	7	4	1	2	1	3	4	3	1	1	3	1	2	1	2	2	3	3	2	1	2	2	3	3	3	3	3	4	4	3	3	4	4	2	2	1	1	1	1	2	2	2	2	2	2
3c08136bba5f93fe	3	1	3	2	7	3	1	2	1	1	4	2	1	1	3	2	2	2	2	2	2	1	2	3	3	4	4	3	3	2	3	3	3	2	2	2	2	2	3	2	2	3	3	3	3	2	2	2	3
e679e2107ed0ea33	3	1	3	3	2	2	1	2	1	2	4	2	1	2	4	1	1	1	1	2	3	3	2	1	3	3	4	4	3	2	3	2	2	2	2	2	2	2	2	3	3	2	2	2	2	3	3	2	2
32c12c7c295a3490	3	1	1	2	7	3	1	1	1	1	4	3	1	2	3	1	3	2	3	2	4	5	1	1	2	4	5	4	2	4	3	2	3	3	3	2	4	2	2	4	1	2	1	2	1	2	2	2	3
5ed46f937a2fedfc	3	1	1	1	4	4	1	1	1	4	4	3	1	1	5	1	5	3	2	4	5	5	5	1	5	5	5	5	5	1	5	3	3	3	3	3	5	5	5	5	5	5	5	3	5	3	2	1	1
8516ccf142b2c77d	3	1	1	2	2	1	1	2	1	3	4	3	1	2	1	2	3	3	2	2	4	4	2	2	3	1	2	3	3	2	2	3	3	3	3	3	3	2	2	4	1	2	2	2	2	1	2	3	3
b7f872d9ca7c84df	3	1	1	1	2	1	1	1	1	1	1	2	1	1	4	1	1	1	1	1	1	1	1	1	1	5	5	2	2	2	2	2	2	2	2	1	2	2	2	2	2	2	2	2	2	2	2	2	2
f54ad04e1de1e4b7	3	1	1	1	7	1	1	2	1	1	4	3	1	1	2	2	4	4	4	2	3	4	4	2	3	3	4	3	3	3	3	3	3	3	3	3	2	2	2	2	2	2	2	2	2	2	2	2	4
070ef5d752409a81	3	1	1	1	8	4	1	2	2	2	3	1	1	3	4	1	4	3	4	4	4	4	2	1	1	4	4	4	3	4	3	2	3	3	3	2	2	2	2	4	2	2	3	2	2	2	2	2	2
2b15191c6b38a9d4	3	1	1	1	8	2	1	1	2	3	4	2	1	3	4	1	1	1	1	1	1	1	1	1	1	1	1	1	1	1	1	1	1	1	1	1	1	1	1	1	1	1	1	1	1	1	1	1	1
dedcec32e66bdb2d	3	1	1	2	4	4	2	2	2	3	5	3	1	3	3	3	3	3	3	2	3	2	2	1	2	4	4	5	5	4	3	3	3	3	3	3	3	3	3	3	3	3	2	2	2	2	2	2	2
7753daeedafc1db8	3	1	1	2	2	4	1	2	1	4	4	3	1	2	2	2	2	2	2	4	5	4	1	4	2	5	5	5	5	4	4	2	2	2	2	4	5	1	4	2	2	2	2	2	2	2	2	2	4
df1b1d546918a440	3	1	2	3	1	3	1	2	1	2	2	3	1	1	2	1	1	2	1	4	4	4	2	1	1	4	4	5	5	5	5	3	3	4	4	2	5	2	4	2	2	2	4	2	2	2	4	2	2
ebf06e2d575f0b35	3	1	1	1	8	4	1	2	1	2	2	3	1	1	2	1	3	3	3	1	1	5	1	1	1	5	5	5	5	5	5	5	5	5	5	5	5	5	5	5	5	5	5	3	5	5	5	1	1
9da83c66d2edffdd	3	1	1	1	7	3	1	2	1	1	2	2	1	1	3	1	2	2	2	2	4	4	2	2	2	3	4	5	4	4	2	2	2	4	4	3	5	1	2	4	4	2	1	2	2	1	2	1	1
4bb578351e2750c2	3	1	1	1	2	4	1	2	2	2	4	2	1	2	2	2	1	1	1	2	3	2	2	2	2	2	2	2	2	2	2	2	3	3	1	3	2	2	2	3	3	2	1	2	2	2	2	1	1
60dacd12f1637184	3	1	1	2	2	4	1	1	2	3	4	2	1	3	3	2	3	5	5	4	4	5	1	1	4	3	4	4	5	5	3	3	3	2	3	3	4	4	2	4	1	1	1	3	2	2	2	2	2
1306adb057928100	3	1	1	1	7	4	1	1	1	2	1	3	1	1	5	2	2	2	2	3	4	4	2	2	2	4	4	3	3	3	3	2	2	3	3	3	3	4	4	4	3	3	3	3	3	2	4	2	2
53906719bf8c81da	3	1	1	1	2	4	1	2	2	4	4	3	1	1	2	2	3	3	3	3	5	4	2	2	4	3	4	4	3	2	3	3	3	3	3	2	4	3	2	3	2	2	3	4	2	3	2	2	2
793d87663d6869e7	3	1	1	1	7	4	1	2	2	2	2	1	1	1	5	2	4	4	4	2	1	4	5	2	2	2	4	4	4	5	4	2	3	3	3	2	5	5	2	2	2	2	2	2	2	2	2	4	4
57b8d16125e26036	3	1	1	1	7	4	1	2	2	2	4	1	1	2	2	1	1	1	2	4	5	4	1	1	4	4	1	5	2	5	4	3	3	4	4	5	4	4	4	1	3	4	4	2	2	1	2	2	2
fe271978ed34a861	3	1	1	1	2	3	1	2	2	2	2	1	1	1	3	4	4	4	4	2	2	4	2	2	3	3	3	2	2	2	2	2	2	4	4	2	4	3	3	4	4	2	2	2	2	3	3	4	4
1b5c8650a398477f	3	1	1	1	2	3	1	2	2	2	4	3	1	3	3	2	2	2	2	2	4	2	2	2	2	2	4	4	4	1	3	2	2	2	2	4	4	2	2	4	3	2	1	2	2	2	2	2	2
40549fd4fb131e56	3	1	2	1	2	2	1	1	2	2	1	1	2	1	4	1	2	1	2	2	1	2	1	2	1	2	2	1	2	1	2	1	2	1	2	4	5	4	4	2	2	2	2	1	2	1	2	2	1
0afd6e4f324ca0ca	3	1	2	1	7	1	1	1	2	2	4	2	1	2	6	1	2	2	4	4	2	3	3	1	2	1	1	3	2	5	5	3	2	2	1	4	4	3	2	5	4	4	2	1	2	1	3	3	2
c7ce216cd3b302c1	3	1	1	1	8	4	1	2	2	4	2	2	1	2	2	1	2	2	2	2	4	4	2	1	1	1	1	4	4	4	4	2	2	2	2	3	2	2	2	1	2	2	2	2	2	2	2	2	2
5f7f7e5af95c3c98	3	1	1	1	7	4	1	2	2	4	2	3	1	2	3	1	3	3	4	2	2	2	2	1	1	2	4	3	4	2	2	3	3	3	3	4	4	2	2	4	2	2	2	2	2	2	2	1	3
ff7b85f75729649e	3	1	1	1	2	4	1	1	2	3	4	2	1	3	5	2	2	2	2	2	2	3	2	2	3	3	4	4	3	2	3	3	3	4	4	3	3	2	2	4	2	2	2	3	2	2	2	2	4
4b94fe9f132e2a6e	3	1	3	1	4	3	1	2	2	1	2	1	1	1	2	1	1	1	1	1	1	1	1	1	1	1	1	1	1	1	1	1	1	1	1	1	1	1	1	1	1	1	1	1	1	1	1	1	1
381a950fa3eb29a4	3	1	1	1	7	1	1	1	2	1	4	2	1	1	2	3	3	3	3	3	3	3	2	3	3	3	3	4	4	4	3	4	3	4	4	3	3	4	3	3	3	3	3	2	3	3	3	3	4
42f114196ca4a2e7	3	1	1	1	7	3	2	1	2	2	5	2	1	1	5	2	3	3	3	3	4	4	3	3	3	3	3	4	4	5	3	3	3	3	3	3	3	3	3	4	4	3	3	3	3	3	3	2	2
5fd4ea9089222b24	3	1	1	1	7	4	1	1	2	4	1	3	1	1	4	1	2	3	3	2	4	3	3	1	2	2	2	4	4	3	3	1	2	2	2	3	3	3	3	3	3	3	3	2	2	2	2	1	1
234e5c2302d2a8dc	3	1	1	2	6	4	1	2	1	4	2	3	1	1	3	1	3	3	4	2	1	2	2	3	3	2	2	4	4	3	3	2	2	2	2	2	4	2	2	2	2	2	2	2	2	2	2	3	4
2ac62e41f033234b	3	1	2	1	2	4	1	1	2	3	1	1	2	1	3	2	2	2	2	2	2	4	2	2	3	3	2	3	3	3	3	3	3	3	3	1	3	2	2	2	2	2	2	2	2	2	2	2	3
a4794169abc755fd	3	1	1	1	1	3	1	1	2	1	2	3	1	2	3	1	2	2	1	2	3	2	2	1	2	1	2	1	1	2	1	2	2	3	2	1	2	2	2	1	2	1	2	1	2	3	2	1	2
5bbea4c409df6b59	3	1	1	2	2	2	1	2	2	2	4	2	1	1	3	2	3	2	2	3	3	4	1	1	1	1	5	5	5	3	3	3	3	3	3	3	5	3	3	3	5	2	1	2	2	2	2	3	3
3a8fb70d30587722	3	1	1	2	2	4	1	2	2	4	4	3	1	3	1	3	5	4	5	2	4	4	2	2	3	5	4	4	5	4	4	3	4	4	4	2	4	4	4	4	3	3	3	2	2	2	3	2	4
0fac338802382045	3	1	2	2	3	4	1	2	1	1	5	2	1	1	3	1	5	5	5	4	5	4	2	2	3	4	4	5	5	2	5	2	2	5	5	1	4	2	2	2	1	2	1	2	2	4	2	1	5
824d67d489975f73	3	1	1	2	7	3	1	2	1	2	2	2	1	1	1	3	3	2	3	2	2	2	3	1	1	4	4	4	5	2	2	3	3	3	3	3	2	2	2	2	2	2	2	2	3	1	2	5	5
f6db26cccea213eb	3	1	1	1	7	3	1	2	2	2	1	3	1	1	3	3	3	3	3	3	3	3	3	3	3	3	4	4	3	3	3	3	3	3	3	3	4	2	2	4	3	2	2	3	3	3	2	2	4
87a5435bfb231da2	3	1	1	1	7	3	1	2	1	2	2	2	1	1	7	2	3	3	3	2	5	5	1	2	3	3	3	4	4	4	2	3	4	4	4	3	4	3	2	4	3	3	2	3	2	2	3	1	1
2a1b7084974b5bff	3	1	1	1	7	3	1	2	1	3	2	2	1	1	2	2	2	2	2	2	4	4	3	1	2	2	2	4	4	4	4	2	2	2	3	2	2	2	4	4	1	1	1	1	1	1	1	4	1
114e7c3138d939ad	3	1	1	2	4	4	1	2	1	4	1	1	1	1	3	2	3	4	4	2	5	5	2	1	4	3	5	5	2	4	3	2	3	4	4	3	4	4	2	4	3	2	2	3	2	2	4	2	5
7d28745c66258757	3	1	1	2	7	4	1	2	1	4	4	1	1	1	2	1	4	4	5	4	5	5	3	1	3	4	5	5	4	5	4	3	4	3	3	2	2	3	4	4	2	2	2	2	2	3	3	3	2
de8f4a651e69b281	3	1	2	4	7	3	1	2	2	2	4	1	1	2	4	1	3	5	2	3	1	4	3	2	2	2	4	4	2	2	2	2	2	4	4	3	4	3	2	3	3	2	1	2	3	2	2	3	4
8d6a1018b337fe35	3	1	1	1	7	4	1	2	2	1	1	1	1	2	2	3	3	3	3	3	3	3	3	3	2	3	3	4	4	4	3	3	3	3	3	3	4	3	3	3	3	3	3	3	3	3	3	2	2
c036131124a2e65d	3	1	1	2	7	4	1	2	2	4	2	3	1	2	2	2	2	2	2	2	2	2	2	2	2	2	2	2	2	2	2	2	2	2	2	2	2	2	2	2	2	2	2	2	2	2	2	3	2
322dd113e6e11526	3	1	1	1	3	4	1	2	1	4	2	2	1	1	3	1	3	3	3	3	1	3	3	1	1	1	5	5	5	1	3	3	3	3	3	3	3	3	3	4	3	2	3	3	2	3	2	3	5
f3206f629fae2d92	3	1	1	1	7	2	1	2	2	1	3	3	1	2	3	1	2	1	2	3	2	4	2	3	2	3	4	4	4	4	4	3	3	3	3	3	2	2	2	4	4	3	2	4	4	4	4	4	4
12d5478df643e1da	3	1	1	2	8	1	1	2	2	1	2	3	1	1	6	2	2	2	1	4	4	4	2	1	2	2	5	4	3	4	3	3	3	3	3	3	2	2	2	2	3	2	2	2	2	1	1	3	4
92b0b66f8514c477	3	1	1	2	7	2	1	2	1	1	2	2	1	1	3	1	1	1	1	2	1	2	2	2	2	2	2	3	2	2	3	4	3	2	2	2	2	2	2	2	3	3	2	2	3	2	2	2	2
929c25e4fc20006a	3	1	1	2	3	4	1	2	3	3	2	3	1	1	4	3	4	4	5	3	3	3	4	2	3	3	4	4	4	5	4	3	3	3	3	2	5	3	2	3	3	3	3	1	2	3	3	3	3
5280990734be4394	3	1	1	1	7	3	1	2	2	1	2	2	1	1	4	2	2	2	2	2	2	3	3	2	1	4	4	4	4	4	4	2	2	1	1	3	2	3	3	2	2	2	2	2	2	1	2	1	1
621e966b61f34be4	3	1	1	1	2	1	1	1	2	1	2	1	1	1	4	1	2	1	1	1	2	1	1	1	1	1	1	1	1	1	1	1	1	1	1	1	1	1	1	1	1	1	1	1	1	1	1	1	1
9881d36477fd41d1	3	1	2	3	3	3	1	1	2	2	2	2	1	1	3	2	2	2	2	2	1	2	1	2	1	2	2	2	2	1	1	2	1	2	2	2	1	2	1	2	1	2	2	2	2	2	2	2	1
69a3a4462df9d3a8	3	1	1	1	2	3	1	2	2	1	2	1	1	1	4	2	2	1	1	3	3	4	1	2	2	3	5	4	4	4	3	2	2	2	2	2	4	1	2	2	1	1	1	1	1	2	1	2	1
c52c4897673ec27b	3	1	1	1	1	2	1	1	1	2	1	1	1	1	3	1	1	1	1	1	1	1	1	1	1	1	1	1	1	1	1	1	1	1	1	1	1	1	1	1	1	1	1	1	1	1	1	1	1
312a898de37d0db4	3	1	1	1	3	1	1	2	2	2	4	3	1	1	3	1	3	2	3	3	2	1	3	1	3	3	1	3	3	2	3	3	2	3	3	2	2	2	2	2	3	2	1	2	2	2	1	3	3
a8be2b7638f7935e	3	1	2	1	7	2	1	2	1	4	4	3	2	1	3	2	4	4	4	2	2	2	2	1	3	5	4	5	4	5	4	3	3	3	3	4	4	2	2	2	2	2	3	2	3	2	2	4	4
5369a9a6e2b2afb6	3	1	1	2	7	4	1	1	2	3	2	3	1	1	3	2	2	2	2	2	4	4	1	2	2	2	4	4	4	2	2	2	2	3	3	2	4	4	2	4	2	2	4	2	2	2	2	2	2
d77811e7e9c99154	3	1	1	1	8	1	1	2	2	2	5	2	1	1	2	1	3	3	3	2	1	1	1	3	3	3	3	3	3	2	1	3	3	3	3	3	1	1	3	4	2	2	4	3	1	3	2	5	5
b8a7ff28e009474a	3	1	1	1	3	1	1	1	1	1	3	3	1	3	3	3	3	3	4	1	1	1	1	1	1	1	1	5	5	5	5	2	2	2	2	2	2	4	4	3	3	3	3	3	3	3	3	2	1
36c66c34f751b786	3	1	1	2	7	1	1	2	1	1	4	3	1	1	5	1	1	1	1	2	4	4	1	1	1	4	5	5	5	4	5	2	2	2	2	1	4	2	2	2	1	1	1	1	1	1	1	2	1
2a5c6fed88acb984	3	1	2	1	2	2	1	1	2	1	2	2	2	1	1	2	2	2	2	3	4	4	2	2	2	4	4	5	4	3	3	2	2	2	2	2	2	2	2	3	4	3	3	2	1	2	2	1	1
9017ccd1bca08831	3	1	1	1	7	1	1	1	2	1	2	2	1	1	3	2	2	1	1	2	4	4	2	2	1	4	5	4	3	4	2	3	3	3	3	3	3	3	2	2	3	1	2	3	3	3	3	3	3
988af12a1b12d457	3	1	1	1	2	4	1	2	1	2	2	1	2	1	2	1	2	2	2	3	3	3	3	2	2	2	3	2	3	2	2	3	3	3	3	2	2	2	2	2	2	2	2	2	2	2	2	3	3
2b3a294a118e707a	3	1	1	1	3	1	1	2	1	4	1	2	2	1	3	2	1	2	3	1	2	2	1	1	2	1	2	2	2	2	2	2	2	2	2	1	1	1	1	2	2	2	2	2	2	2	2	2	2
ada6b0d78ac8739e	3	1	2	2	2	2	1	1	2	3	4	2	1	1	6	1	1	1	1	1	1	1	1	1	1	1	1	1	1	1	1	1	1	1	1	1	1	1	1	1	1	1	1	1	1	1	1	1	1
18430e3506f65649	3	1	2	2	2	2	1	1	1	1	1	1	1	2	5	1	1	1	1	1	1	1	1	1	1	1	1	1	1	1	1	1	1	1	1	1	1	1	1	1	1	1	1	1	1	1	1	1	1
e444bef4992ffd80	3	1	2	1	7	2	1	2	2	1	4	2	1	1	4	1	1	1	1	1	1	1	1	1	1	1	1	1	1	1	1	1	1	1	1	1	1	1	1	1	2	1	2	1	1	2	2	3	3
0e1ef36190819f11	3	1	3	2	1	4	1	2	1	2	4	2	1	1	4	1	2	2	2	2	2	2	2	1	1	1	2	4	4	2	2	1	2	2	2	2	2	2	2	2	2	2	1	1	1	1	1	4	4
a7d4b23c9373b695	3	1	2	2	8	4	1	2	1	2	2	3	2	1	2	1	2	2	3	2	1	1	1	2	2	1	4	4	4	2	5	4	2	1	2	2	4	2	2	2	2	1	1	2	1	1	2	2	1
2b25913f43d14ffc	3	1	2	2	3	2	1	1	2	2	2	2	1	1	2	2	2	2	2	2	2	2	2	2	1	2	2	2	2	2	2	2	2	1	2	2	1	2	1	2	1	2	2	2	1	2	2	2	3
07dd626eca4fd86c	3	1	2	2	3	2	1	1	2	2	3	2	1	2	3	2	2	2	2	2	2	2	2	2	2	2	2	2	2	2	2	2	2	2	2	2	2	2	2	2	2	2	2	2	2	1	2	1	2
4f687c040db198fb	3	1	1	2	7	2	1	2	1	1	4	1	1	2	8	1	2	2	2	3	4	3	2	1	2	4	4	3	3	4	3	3	2	4	3	3	2	2	2	2	1	2	1	2	2	2	2	2	2
c0febb903f8b62e2	3	1	1	1	2	1	1	2	2	3	5	2	1	1	2	1	5	5	3	2	2	2	1	2	2	3	5	5	5	4	3	3	3	4	4	1	1	1	2	2	2	2	2	2	2	2	2	3	3
3eff16eadd413c15	3	1	1	1	2	1	1	2	1	1	4	2	2	1	1	2	2	3	3	2	3	2	3	2	2	3	3	2	2	2	2	3	2	2	2	3	2	3	2	3	2	3	2	2	2	3	2	2	3
34029b2b24ec5ed8	3	1	1	1	7	1	1	2	2	2	1	3	1	1	3	2	3	4	1	3	4	1	1	1	4	5	5	2	1	2	2	1	2	4	5	3	4	1	2	4	2	2	2	3	2	2	3	1	2
7835994e89979ebe	3	1	1	1	7	2	1	2	2	3	2	1	2	2	3	1	2	2	1	2	1	1	1	2	2	2	2	1	2	3	3	1	1	1	1	2	2	2	2	3	4	2	1	2	2	2	1	2	2
c9b6e8ddff2b1874	3	1	2	2	7	2	1	1	2	1	2	1	2	1	2	1	2	1	2	2	1	2	2	2	1	2	1	2	2	1	2	2	1	2	1	2	2	2	1	1	2	1	2	2	1	2	1	2	1
ea33d435ff3ba220	3	1	2	4	7	3	2	1	1	1	3	1	2	1	8	2	3	3	3	4	5	5	3	2	2	5	5	4	3	5	5	3	3	3	4	3	5	5	4	3	2	2	2	2	1	2	2	2	2
3ff1d579e6b704cf	3	1	1	1	7	1	2	2	2	1	2	3	1	2	4	2	2	2	2	2	2	2	2	2	2	2	3	4	3	3	3	2	2	2	2	3	3	3	3	2	3	2	2	2	2	2	2	4	4
440969525ea7f119	3	1	3	2	7	3	1	2	1	2	2	1	1	1	2	2	2	2	1	2	2	2	2	2	2	1	1	2	1	1	2	2	1	2	2	2	1	2	2	2	1	2	2	2	1	2	2	2	1
dbd9dc4221803365	3	1	1	1	3	4	1	2	1	2	2	1	1	1	1	2	2	2	2	2	2	2	2	2	2	2	2	2	2	2	2	2	2	2	2	2	2	2	2	2	2	2	2	2	2	2	2	2	2
a43e29b6cadf5c36	3	1	1	4	8	3	1	2	1	4	3	1	2	2	2	3	3	3	3	3	4	4	3	3	3	3	3	4	3	4	3	2	3	3	3	4	4	4	4	2	4	3	3	2	2	2	2	2	2
df5045cce54afe17	3	1	1	2	3	4	1	2	1	2	2	3	1	1	3	3	3	3	3	3	4	4	3	3	3	3	4	4	4	4	3	3	3	4	4	3	4	3	3	3	3	3	3	3	3	3	3	4	4
6e7aa34e6bcd3a5c	3	1	1	2	3	1	1	1	1	1	4	1	1	1	2	2	3	4	4	2	4	3	2	2	3	2	2	2	2	2	4	4	2	2	3	4	2	2	2	2	3	2	2	1	1	1	1	1	4
8e3cca4aaf509b10	3	1	1	1	7	2	1	2	2	1	4	1	1	1	7	1	1	3	5	2	5	5	5	2	2	2	5	4	2	2	1	2	2	2	2	2	2	2	2	4	1	1	1	1	1	1	1	1	1
4141048231d6ff8f	3	1	1	1	2	2	1	2	2	3	2	2	1	2	2	2	2	2	2	2	2	2	2	2	2	2	2	2	2	2	2	2	2	2	2	2	2	2	2	2	2	2	2	2	2	3	3	2	2
f09a619dc731bc9b	3	1	2	3	2	1	1	2	2	2	2	1	2	1	4	1	1	1	1	1	1	1	1	1	1	1	1	1	1	1	1	1	1	1	1	1	1	1	1	1	1	1	1	1	1	1	1	1	1
88a75c566efb95d6	3	1	1	1	7	2	1	1	2	2	4	1	1	2	3	1	2	1	2	2	2	2	1	1	2	2	2	1	2	2	2	1	2	1	1	2	3	2	1	1	3	3	3	2	4	3	3	1	2
8bc787d369032ecb	3	1	3	1	2	2	1	2	2	1	3	1	1	1	2	1	2	1	2	1	1	1	1	1	1	1	1	1	1	1	1	1	1	1	1	1	1	1	1	1	2	1	1	1	2	1	2	1	1
1e455e81260e67af	3	1	1	1	1	3	1	2	1	1	2	1	1	1	3	1	2	2	1	4	4	5	2	1	2	4	4	5	2	4	4	3	3	3	3	2	4	2	1	4	4	2	2	4	3	2	2	1	1
d8f25bf7b810a662	3	1	2	2	1	4	1	1	1	2	2	2	2	1	2	1	5	5	5	3	5	5	1	2	3	5	5	4	5	5	4	3	2	4	5	5	5	5	2	5	5	2	2	2	2	5	4	1	1
211634ab2fdbc9f3	3	1	1	1	7	4	2	2	2	3	2	1	1	2	3	2	4	4	4	2	4	4	4	2	3	3	2	5	5	3	2	2	2	5	5	3	4	3	3	4	3	3	3	2	3	3	3	1	1
26da7941fbcb9135	3	1	2	2	2	2	1	1	1	1	2	1	1	1	2	1	2	2	2	1	2	2	2	1	2	2	2	1	2	2	2	1	2	2	2	1	2	1	2	1	2	1	2	1	2	2	2	1	2
e98b1eb54e30e9c9	3	1	1	1	7	1	1	2	2	1	4	3	1	1	4	1	2	2	2	3	4	4	4	2	2	3	3	3	4	4	4	3	3	4	3	3	4	3	3	3	3	2	3	2	2	2	3	2	2
6c47ca244879a39d	3	1	1	1	3	4	1	2	1	2	2	3	1	1	3	3	4	2	4	2	3	4	2	2	3	4	4	4	4	4	3	4	3	3	3	2	2	4	4	2	2	2	2	2	2	2	2	4	4
c7d0f7e13ce8f2f9	3	1	1	2	6	1	1	1	2	1	2	2	1	2	2	1	1	1	1	2	1	4	1	1	4	4	5	4	5	2	2	2	3	3	3	4	2	2	2	4	2	2	2	4	1	1	2	2	2
9388131d89c92022	3	1	1	2	3	3	1	1	1	3	2	3	1	3	8	3	5	5	5	3	4	2	3	2	3	4	4	5	5	5	3	5	5	5	5	3	4	3	3	3	4	2	2	3	3	2	3	2	2
282398c7e5d45360	3	1	1	1	2	4	1	2	1	3	1	3	1	3	3	2	3	2	3	3	3	2	3	5	5	5	5	4	3	3	3	3	3	3	3	3	3	3	3	3	3	3	3	3	3	3	3	3	3
ad0744e3e5e15270	3	1	1	2	7	4	1	2	1	3	1	3	1	1	3	2	4	2	3	3	1	5	1	2	4	4	5	5	5	5	1	3	2	4	4	3	5	2	3	4	3	2	3	1	2	3	4	1	1
2292b3acafa7f853	3	1	3	2	1	1	1	1	2	2	4	2	2	1	2	1	1	2	3	1	2	1	1	1	2	3	4	1	1	1	1	1	2	2	1	2	1	2	1	2	2	2	2	2	2	2	2	2	2
7a011274825c96c6	3	1	2	2	7	2	1	1	2	1	2	2	1	2	7	2	3	3	4	4	3	3	4	3	2	3	2	2	2	3	4	4	3	2	4	3	2	3	3	4	4	3	2	3	3	4	3	2	2
ec476fadc5b0f62b	3	1	1	1	1	2	1	2	2	2	2	1	1	2	3	1	1	1	1	2	4	4	4	1	3	3	4	4	4	4	4	3	3	3	3	4	4	4	4	4	4	4	4	3	2	2	2	2	2
d8bbd5db4f8b8878	3	1	1	1	1	1	1	2	2	1	3	1	1	1	2	1	1	1	1	3	5	5	3	1	1	4	5	2	5	5	5	1	2	2	2	4	4	1	1	4	4	2	5	2	1	1	4	1	2
b621528791140e95	3	1	1	1	3	1	2	1	1	1	4	1	1	2	1	2	1	2	2	2	4	5	1	2	2	3	3	2	3	4	2	1	2	2	2	3	4	4	4	4	3	3	2	2	1	2	2	2	2
f30cc4682d08eb2a	3	1	3	1	6	3	1	1	1	3	2	1	1	1	2	1	1	1	1	2	1	2	2	2	2	2	2	4	4	4	2	2	2	2	2	3	4	3	3	2	2	2	2	2	2	2	2	2	2
22c5d1a0bf372f7d	3	1	2	1	3	2	2	2	3	1	2	2	1	1	3	2	2	2	2	3	3	4	2	2	2	2	2	4	3	3	3	2	2	2	3	2	4	2	2	2	3	2	2	2	2	2	3	2	2
e523362ccf721e1a	3	1	1	1	1	4	1	2	1	3	1	1	1	3	4	2	3	2	2	3	4	4	4	2	3	3	4	5	3	5	5	2	1	2	2	2	5	5	5	5	3	2	2	2	2	2	4	1	1
abe9495be3c8b835	3	1	3	3	1	1	1	2	2	2	4	2	2	2	3	1	1	1	1	2	2	2	2	1	1	1	1	4	4	4	4	3	3	3	4	2	2	2	2	2	3	3	3	2	2	2	2	1	1
6226744d555e126c	3	1	1	1	7	4	1	1	1	3	2	2	1	1	3	1	1	1	1	2	2	2	2	1	2	2	1	2	2	1	1	2	2	1	2	2	2	2	2	1	2	2	1	2	2	2	2	1	5
bfaa41ea34d4e2b0	3	1	2	2	7	2	1	1	2	2	2	2	1	1	7	3	4	3	3	2	1	3	3	2	2	2	2	3	3	2	3	5	4	5	5	2	4	4	4	2	2	2	2	2	2	2	2	3	3
eee4c1f117b7776a	3	1	3	1	1	2	1	1	1	1	2	1	2	1	5	1	1	1	1	1	1	2	2	1	1	2	1	1	1	1	1	1	2	2	2	1	1	1	1	1	1	1	1	1	1	1	1	1	1
a33ad02912f5e41b	3	1	1	1	2	3	1	1	2	1	4	2	1	1	5	2	2	1	2	2	1	1	1	1	1	1	1	5	5	4	4	2	3	4	3	2	2	2	2	2	2	2	2	2	2	1	1	2	1
d5d7feef2ace7c7c	3	1	2	2	2	2	1	1	2	2	2	2	1	1	4	2	2	2	1	2	1	2	1	2	1	2	1	2	1	2	2	2	1	2	2	2	1	2	1	2	1	2	2	2	1	2	1	2	1
fc39184c0fe1408f	3	1	2	3	7	3	1	1	1	1	2	2	1	2	5	2	2	2	2	2	2	2	2	2	2	2	2	2	2	2	2	2	2	2	2	2	2	2	2	2	2	2	2	2	2	2	2	2	2
399e04fcd6fd7145	3	1	1	2	6	1	1	1	2	1	2	2	1	2	6	1	1	1	1	1	1	1	1	1	1	1	1	1	1	1	1	1	1	1	1	1	1	1	1	1	1	1	1	1	1	1	1	1	1
9d790dac0e8698bc	3	1	1	1	7	1	1	2	2	1	4	2	1	2	4	2	1	1	2	4	4	5	3	2	2	3	4	2	2	3	1	2	2	2	2	2	2	4	2	4	1	2	1	2	2	2	2	2	4
d06c289fdf7ec02e	3	1	1	1	7	1	1	2	2	1	1	3	2	1	3	1	2	1	2	2	1	2	1	2	1	2	1	1	1	2	1	2	1	2	1	1	1	1	1	2	1	2	1	2	2	1	2	1	2
c9819f203008a6f7	3	1	1	1	7	1	1	2	2	1	2	2	1	2	2	2	2	2	1	3	2	3	3	3	4	3	3	3	3	3	3	2	3	4	4	3	2	1	1	3	1	1	1	3	3	3	3	2	3
f426be218b0a2d68	3	1	1	1	2	1	1	1	2	1	2	2	1	1	2	3	2	3	2	2	3	4	3	2	3	2	3	1	2	1	2	1	2	3	1	2	3	2	2	1	2	1	2	1	1	1	1	2	3
abdb31b3c7fb8627	3	1	2	2	2	2	1	1	1	1	4	1	2	2	4	2	3	2	2	2	3	2	2	3	4	2	2	2	3	3	2	2	3	3	2	3	2	3	3	2	3	2	2	2	3	3	3	2	2
83ac8670c7056484	3	1	1	1	8	2	1	2	2	3	2	3	1	2	3	1	2	2	1	5	5	5	5	2	2	3	5	5	3	5	5	2	3	3	3	3	3	3	3	4	3	2	3	3	3	3	3	2	2
5de5b768f3e0df36	3	1	2	1	3	1	2	2	1	1	2	1	1	1	6	5	5	4	4	1	2	3	2	2	2	2	3	1	2	3	2	1	2	5	5	1	2	5	5	1	2	2	1	1	2	1	2	1	1
8b6c9455d7f9c5c4	3	1	1	1	8	3	1	2	2	1	4	1	1	1	1	1	1	1	1	4	4	4	4	1	1	4	5	4	4	4	4	2	2	2	2	2	2	2	2	2	2	2	2	2	2	2	2	4	4
1369e6de4e57913c	3	1	1	1	4	1	2	1	1	1	2	3	2	1	6	2	2	2	2	1	2	5	1	3	3	3	3	3	3	2	3	2	3	5	4	3	1	2	2	2	3	3	1	2	3	1	2	2	2
03c3f7fd7bcfc23f	3	1	1	2	1	4	1	2	2	1	5	3	1	2	2	3	3	3	3	3	3	3	3	3	3	3	3	3	3	3	3	3	3	3	3	3	3	3	3	3	3	3	3	3	3	3	3	3	3
85f74cfbd5b174b7	3	1	1	1	7	3	1	2	1	2	2	3	2	1	3	3	3	3	3	3	3	3	3	3	3	3	3	3	3	3	3	3	3	3	3	3	3	3	3	3	3	3	3	3	3	3	3	3	3
3acde942bdf1a823	3	1	1	1	7	3	1	2	2	1	2	2	2	1	3	2	2	1	1	2	3	2	3	1	1	2	3	5	5	4	5	3	3	3	3	3	3	3	3	2	3	3	1	2	1	1	4	3	3
e02e78441ac02e58	3	1	3	1	3	1	1	2	1	1	4	3	2	1	3	2	3	2	2	2	2	2	2	2	2	2	2	2	2	2	2	2	2	2	2	2	2	2	2	2	2	2	2	2	2	2	2	2	2
c1d7165ac040e12b	3	1	1	1	2	2	1	1	1	2	2	1	1	1	4	2	2	2	2	2	2	2	2	2	2	2	2	2	2	2	2	2	2	2	2	2	2	2	2	2	2	2	2	2	2	2	2	2	2
8f0dd5365742f53f	3	1	1	1	1	3	1	2	1	1	2	3	1	1	4	1	1	1	1	1	1	1	1	1	1	1	1	5	5	5	5	1	1	1	1	2	5	2	5	5	5	5	5	2	2	2	2	2	2
fd0a7e9e3ad4f885	3	1	1	3	2	1	1	2	1	1	1	1	1	1	5	1	1	1	1	1	1	1	1	1	1	1	1	1	1	1	1	1	1	1	1	1	1	1	1	2	2	1	1	2	2	1	1	1	1
6fbe9a57ec3248c7	3	1	1	1	2	4	1	2	1	4	1	1	1	1	2	1	4	4	4	4	5	5	1	1	2	5	5	5	2	5	3	2	3	3	3	4	4	2	2	4	4	2	3	2	2	2	2	2	2
2022-10-19 11:01:53	2	1	2	2	6	3	1	1	2	3	2	2	1	2	5	2	4	3	4	4	2	3	2	2	2	2	2	2	5	4	4	4	1	2	4	4	3	4	1	1	1	1	1	1	2	2	1	1	2
2022-10-19 12:04:32	2	1	1	1	7	4	1	2	2	3	2	3	1	2	1	2	2	2	4	2	4	1	3	2	4	3	4	3	4	2	1	3	3	4	4	1	2	2	1	2	1	2	2	4	2	4	2	4	4
2022-10-19 12:14:33	2	1	1	2	7	3	1	2	2	2	2	3	1	1	3	2	3	4	4	3	4	4	2	3	4	3	4	2	2	3	4	4	4	4	4	2	3	3	3	2	2	2	2	2	2	3	2	2	3
2022-10-19 12:18:27	2	1	1	1	3	3	1	2	2	4	2	3	1	1	3	1	1	1	2	2	3	4	2	1	2	4	5	2	3	2	3	3	2	2	2	1	1	1	1	2	1	2	1	2	2	2	2	5	2
2022-10-19 12:21:52	2	1	1	2	7	3	1	1	2	2	4	2	1	3	4	1	4	3	5	4	4	3	4	1	2	4	3	3	2	4	4	1	3	2	2	3	3	1	1	2	2	3	1	2	2	1	1	2	4
2022-10-19 12:28:35	2	1	1	1	3	4	1	2	2	4	1	2	1	1	2	1	4	4	5	1	4	2	2	3	3	3	3	4	4	3	2	4	3	3	3	3	4	2	2	2	3	2	1	3	3	3	2	2	4
2022-10-19 12:31:02	2	1	3	2	1	4	1	2	2	1	2	3	2	1	3	2	2	3	3	3	5	4	2	2	3	4	5	3	3	2	5	3	3	3	3	1	3	2	2	1	3	2	1	2	2	2	1	1	2
2022-10-19 12:34:33	2	1	1	2	2	2	1	1	1	1	3	3	2	2	3	2	3	1	3	2	5	2	2	3	5	3	3	4	4	2	5	2	3	4	4	3	3	3	4	4	1	2	1	1	1	1	3	3	3
2022-10-19 13:23:22	2	1	3	2	1	4	1	1	2	3	4	2	2	2	4	2	1	2	1	3	2	4	1	2	2	2	3	2	1	2	2	1	2	2	2	2	5	2	1	2	4	2	3	1	1	1	2	1	3
2022-10-19 13:26:23	2	1	1	2	7	3	1	1	1	2	2	3	1	1	7	1	3	3	3	3	2	2	3	2	2	4	5	4	4	4	4	2	2	3	3	1	2	2	2	2	2	2	2	2	3	3	2	3	3
2022-10-19 13:30:51	2	1	3	2	1	4	2	2	1	3	4	3	1	1	3	2	4	4	4	2	5	5	1	2	4	5	5	4	2	4	3	2	2	2	4	2	3	1	4	2	2	3	1	2	2	4	2	4	5
2022-10-19 13:31:58	2	1	2	1	7	1	1	2	2	1	2	2	2	3	2	2	1	1	1	3	3	1	2	1	2	3	3	2	4	3	3	2	3	2	2	2	4	2	4	3	2	2	2	2	1	2	2	5	3
2022-10-19 13:38:12	2	1	1	1	1	1	1	2	2	1	2	3	1	2	2	3	1	2	1	3	2	5	2	3	5	3	4	3	2	3	3	4	3	4	4	2	3	4	4	3	3	1	3	2	2	3	2	2	2
2022-10-19 13:57:35	2	1	3	3	2	1	1	1	1	1	2	3	2	1	3	1	2	2	3	2	4	4	1	1	2	3	5	1	4	3	3	1	2	2	1	4	2	1	2	1	4	2	2	1	2	1	1	3	1
2022-10-19 14:01:18	2	1	1	2	3	4	1	2	2	4	2	2	1	1	3	1	4	4	4	2	4	4	5	2	4	4	5	4	4	2	4	4	2	4	4	2	4	2	4	2	1	2	2	4	2	4	4	2	4
2022-10-19 14:03:09	2	1	1	2	3	3	1	2	2	2	1	1	1	3	3	2	4	4	4	2	4	3	2	2	4	3	5	3	4	2	3	2	2	3	3	2	4	2	1	2	2	3	2	3	2	3	2	3	2
2022-10-19 14:20:50	2	1	1	1	7	4	1	1	2	3	4	1	1	2	1	1	3	3	4	2	1	3	5	1	2	4	5	2	3	2	3	1	2	4	4	2	2	1	2	1	1	1	1	3	2	2	1	3	4
2022-10-19 14:35:46	2	1	2	2	2	1	1	1	1	1	2	1	2	1	4	2	1	1	1	2	4	5	3	1	1	3	5	4	3	4	4	3	3	3	3	2	2	4	4	3	3	3	3	2	2	2	2	2	2
2022-10-19 14:46:54	2	1	1	2	7	3	1	1	1	1	2	1	1	1	8	1	1	1	1	1	2	4	3	1	4	4	5	2	4	2	2	2	2	2	2	2	2	3	1	2	1	3	1	1	2	2	2	2	2
2022-10-19 15:32:34	2	1	1	2	2	2	1	2	1	2	2	3	2	2	4	1	2	3	5	3	1	1	1	1	1	5	5	3	4	3	3	1	1	1	2	1	1	1	2	1	1	2	1	2	1	1	1	3	2
2022-10-19 15:48:00	2	1	1	1	2	1	1	1	2	1	2	2	1	2	8	2	4	4	4	1	5	5	1	3	3	3	3	5	5	5	5	2	2	2	1	3	5	1	5	5	5	2	4	2	2	2	2	1	2
2022-10-19 15:51:52	2	1	3	2	1	4	1	2	2	1	2	3	2	1	4	1	3	2	2	4	3	4	3	2	2	1	4	2	3	4	2	2	3	2	4	1	2	1	2	2	3	2	1	2	2	3	1	4	5
2022-10-19 15:52:24	2	1	3	2	7	4	2	2	1	3	2	3	2	3	1	2	2	2	2	4	4	4	2	2	2	4	4	5	4	4	4	2	2	2	2	2	5	2	4	5	2	2	2	2	2	2	2	2	5
2022-10-19 16:03:46	2	1	1	2	3	3	1	1	2	2	2	2	1	3	1	1	3	3	4	4	5	4	2	1	2	2	5	4	4	2	2	2	2	1	2	2	4	2	2	3	3	2	1	2	2	2	3	2	4
2022-10-19 16:23:48	2	1	1	1	7	1	1	1	2	1	2	2	1	2	5	1	1	1	1	1	4	4	1	3	3	3	3	2	2	4	4	1	1	1	1	3	3	4	2	2	3	1	1	2	2	4	2	4	2
2022-10-19 17:33:53	2	1	1	1	3	1	1	1	2	2	1	1	2	1	1	1	2	3	2	3	2	2	2	1	2	4	4	3	3	4	4	3	3	3	3	2	4	2	2	3	2	2	2	2	3	2	2	3	4
2022-10-19 17:43:24	2	1	1	1	1	2	1	1	2	1	1	1	1	1	1	2	2	2	2	4	2	2	2	2	3	2	4	4	4	4	4	4	3	4	4	2	4	2	4	4	2	2	2	4	2	2	2	4	4
2022-10-19 17:56:58	2	1	1	2	7	4	1	2	2	1	2	3	1	1	2	1	3	3	4	2	2	1	3	1	2	3	3	3	2	2	3	2	3	2	4	3	2	2	4	1	1	1	2	2	4	2	1	2	4
2022-10-19 19:25:57	2	1	2	2	7	2	1	2	2	1	2	2	2	2	2	1	1	1	1	2	3	2	2	2	3	3	4	3	2	2	3	3	2	3	3	2	2	1	1	2	3	2	2	2	2	2	2	3	2
2022-10-19 20:03:59	2	1	1	2	7	1	1	2	2	1	2	1	1	1	4	1	2	2	2	3	4	3	2	2	3	3	2	3	3	2	3	2	2	3	3	2	3	3	2	2	4	2	2	2	2	2	2	2	3
2022-10-19 20:14:51	2	1	1	1	5	4	1	2	2	3	2	1	1	3	3	3	4	4	5	3	1	1	3	3	3	1	1	3	4	4	3	3	2	3	3	2	3	3	3	2	2	1	1	2	1	2	2	4	4
2022-10-19 20:29:55	2	1	1	1	2	1	1	2	2	1	2	3	1	2	1	2	4	4	4	2	5	5	1	3	3	3	3	4	4	5	3	3	2	2	1	3	5	1	5	5	5	2	4	2	2	2	2	1	2
2022-10-19 20:36:36	2	1	1	1	1	1	1	2	2	1	2	2	1	2	2	2	2	2	3	3	3	3	3	2	3	3	2	3	3	3	2	2	3	3	3	2	3	3	3	2	3	2	2	3	2	3	2	4	4
2022-10-19 20:37:09	2	1	1	2	8	3	1	1	2	1	4	1	1	1	1	1	4	3	4	2	1	2	4	2	2	5	5	3	3	4	2	3	2	2	3	3	3	2	2	1	2	2	1	2	2	3	4	2	4
2022-10-19 21:01:44	2	1	3	2	1	4	1	1	2	1	2	3	2	2	1	2	2	2	2	2	4	4	2	4	4	2	4	4	3	4	4	2	2	3	4	2	4	2	4	2	2	2	1	2	2	1	1	2	2
2022-10-19 21:22:55	2	1	1	1	7	1	1	2	1	1	2	1	1	2	1	1	1	1	1	2	4	2	1	1	2	3	1	4	4	2	3	4	4	3	3	3	2	2	2	2	3	2	3	3	3	3	3	2	3
2022-10-19 21:32:14	2	1	1	1	7	1	1	2	1	1	2	1	1	2	1	1	1	1	1	2	3	2	2	1	2	3	4	4	4	2	3	3	3	3	3	3	4	2	2	2	3	2	3	2	3	3	4	3	3
2022-10-19 22:34:08	2	1	2	2	7	4	1	2	1	1	2	1	2	2	2	1	2	2	2	5	3	3	2	3	2	3	5	5	3	5	3	2	3	3	3	2	3	2	2	3	2	2	1	2	2	2	2	2	2
2022-10-19 22:54:26	2	1	1	2	2	2	1	1	2	1	4	2	1	1	4	2	2	3	3	3	5	5	1	1	2	3	4	4	4	2	2	3	1	2	3	2	1	1	4	4	5	2	1	1	1	2	1	2	5
2022-10-19 23:41:24	2	1	2	2	7	4	1	2	2	4	4	2	1	1	4	5	5	5	5	1	5	3	1	4	3	2	5	4	4	2	2	3	3	3	3	2	4	2	2	2	2	2	1	2	2	2	1	2	4
2022-10-20 00:34:15	2	1	1	1	7	2	1	2	2	3	3	3	1	1	3	3	2	4	3	3	2	4	2	1	3	4	3	3	2	4	3	3	3	2	3	2	2	2	2	2	3	1	1	2	3	2	2	1	1
2022-10-20 08:31:39	2	1	1	1	3	3	1	1	2	3	1	3	1	1	3	2	3	3	5	2	5	5	3	3	4	4	4	5	2	3	4	5	5	5	5	2	2	2	1	3	1	2	1	5	3	3	2	4	4
2022-10-20 09:46:39	2	1	1	2	1	4	1	1	2	3	2	2	2	2	1	1	2	1	2	2	3	4	1	2	3	4	4	3	3	3	3	2	2	2	3	1	3	2	2	2	2	2	2	2	2	2	1	2	4
2022-10-20 10:33:28	2	1	3	3	7	4	1	1	2	2	2	3	2	1	1	1	1	1	1	1	4	5	1	1	4	2	4	4	3	2	2	2	2	3	3	2	4	1	2	2	1	2	1	2	1	1	1	2	1
2022-10-20 10:39:33	2	1	1	1	1	2	2	2	2	2	2	2	1	2	2	1	1	1	1	1	5	5	2	1	1	5	5	5	4	4	5	3	3	3	3	4	4	2	4	5	2	4	1	4	1	2	2	1	1
2022-10-20 10:42:46	2	1	1	2	7	4	1	2	2	1	2	2	1	1	3	2	3	3	3	3	4	3	2	2	3	3	4	2	3	4	3	3	3	3	3	2	2	2	2	2	3	3	3	2	3	2	4	2	3
2022-10-20 12:01:14	2	1	1	2	7	1	1	2	2	1	2	2	1	1	4	1	2	2	1	3	2	1	1	2	1	3	5	1	3	2	1	1	2	1	3	1	2	2	1	1	1	1	2	1	3	4	2	2	3
2022-10-20 12:48:14	2	1	1	1	3	1	1	1	2	2	2	2	1	3	1	2	4	3	5	2	2	4	3	1	2	2	5	2	2	1	1	3	3	4	4	2	1	1	1	2	3	2	2	2	3	2	2	1	4
2022-10-20 13:07:32	2	1	1	2	7	3	1	1	2	1	4	2	1	1	2	1	3	3	3	2	2	2	3	2	3	1	3	4	4	4	5	2	2	2	2	3	3	3	3	2	1	1	1	2	2	2	2	2	3
2022-10-20 13:26:31	2	1	3	2	3	4	1	2	1	3	3	3	2	1	2	2	3	3	4	2	4	4	2	2	3	4	4	4	4	4	4	3	3	4	3	2	4	2	2	2	2	2	1	3	2	2	2	2	4
2022-10-20 13:35:36	2	1	2	2	2	4	1	2	2	4	4	2	1	1	1	1	4	4	4	3	3	2	2	1	2	3	4	4	3	4	3	4	2	4	4	4	2	1	1	2	2	1	1	1	2	2	2	3	2
2022-10-20 13:37:02	2	1	3	2	3	4	1	2	1	3	3	2	2	1	3	1	4	4	4	2	4	4	2	2	4	4	4	4	4	4	4	3	3	4	3	2	4	2	2	2	2	2	2	2	2	3	2	2	4
2022-10-20 13:39:25	2	1	3	3	7	4	1	1	2	1	2	2	1	1	1	2	2	2	4	3	4	4	2	1	2	3	4	4	3	3	2	2	2	2	2	2	2	2	2	2	2	2	2	2	2	2	2	2	4
2022-10-20 13:40:57	2	1	2	2	3	4	1	2	1	3	2	1	1	2	2	5	3	3	5	2	5	2	2	2	4	4	4	3	4	3	2	4	3	3	3	2	2	2	2	2	2	2	2	3	2	3	3	2	2
2022-10-20 13:41:34	2	1	1	1	2	1	1	2	1	1	2	1	2	1	2	1	1	1	1	2	3	3	3	1	1	3	4	5	5	4	4	3	3	3	3	3	3	1	1	2	4	2	1	3	3	3	3	1	1
2022-10-20 13:45:58	2	1	1	1	2	1	1	1	1	1	2	1	2	1	2	1	1	1	1	3	3	5	3	1	1	3	5	4	4	4	4	2	3	3	3	2	3	3	3	2	3	1	1	1	1	1	1	1	1
2022-10-20 13:54:00	2	1	2	2	2	4	1	1	2	3	4	2	2	1	3	2	2	2	2	2	4	4	2	2	2	5	5	3	3	4	4	2	2	2	2	2	3	3	3	2	2	2	2	2	2	2	2	2	4
2022-10-20 14:01:13	2	1	1	2	7	2	1	1	2	2	2	3	1	2	2	1	2	1	1	2	4	2	2	2	3	4	4	4	4	4	4	2	2	2	2	3	4	2	2	4	2	2	2	2	2	1	1	1	1
2022-10-20 14:11:00	2	1	1	2	2	4	1	1	2	4	4	1	1	1	6	2	3	3	2	3	2	4	2	2	4	3	5	4	4	2	2	4	3	3	3	3	2	2	2	2	2	2	2	3	2	2	2	2	3
2022-10-20 17:03:06	2	1	2	2	1	4	1	2	2	3	2	1	2	2	3	1	4	3	4	1	2	2	1	1	2	3	4	3	2	2	3	3	3	3	2	2	4	2	4	2	4	2	2	4	3	2	2	2	4
2022-10-20 19:36:53	2	1	2	2	1	4	2	2	2	3	4	2	1	1	3	1	5	5	5	1	4	5	3	1	4	4	4	5	5	5	5	5	5	5	5	1	5	2	5	2	1	1	1	1	3	3	1	3	4
2022-10-20 19:43:23	2	1	1	1	7	4	1	2	1	3	2	2	1	1	2	1	3	5	5	3	2	2	4	4	2	5	4	5	5	5	2	2	2	2	2	2	4	2	2	2	1	1	2	3	2	2	2	1	1
2022-10-20 21:22:47	2	1	1	2	3	4	1	1	1	2	2	2	1	1	3	1	4	2	4	4	4	4	2	2	2	4	4	2	2	4	3	3	2	2	2	2	4	2	2	3	3	2	2	2	2	2	2	4	4
2022-10-20 23:16:16	2	1	1	1	3	4	1	1	2	2	1	2	1	1	1	1	3	3	3	4	2	2	4	3	3	2	4	4	2	4	4	2	3	3	3	2	4	1	1	1	1	1	1	3	3	4	1	2	3
2022-10-21 08:59:51	2	1	3	2	1	4	2	2	2	2	2	3	2	2	1	1	4	3	4	2	4	4	2	2	2	5	5	4	5	4	2	2	2	2	2	2	4	4	4	2	2	2	2	2	2	2	2	2	2
2022-10-21 09:00:47	2	1	1	1	2	4	1	2	2	3	2	3	1	1	2	2	2	2	3	2	4	5	2	3	3	4	4	3	2	2	2	3	3	3	2	3	4	2	3	2	1	3	1	3	3	3	2	2	1
2022-10-21 09:03:44	2	1	3	3	2	4	1	2	2	1	4	2	1	3	2	1	2	3	3	4	5	4	3	3	2	4	4	4	4	3	3	2	2	3	2	2	4	1	3	2	3	2	1	2	1	2	2	1	2
2022-10-21 12:08:02	2	1	1	2	2	4	1	2	1	3	4	1	1	3	1	1	5	2	2	2	5	4	1	2	2	3	3	5	5	5	5	2	3	2	5	3	4	2	2	4	4	2	2	3	2	3	3	2	4
2022-10-21 12:42:11	2	1	2	2	1	4	1	2	2	3	2	3	1	1	3	1	2	2	3	5	3	2	1	1	3	5	1	5	3	5	4	2	2	2	1	2	5	1	2	4	4	1	2	1	2	2	2	1	1
2022-10-21 14:13:53	2	1	2	1	4	4	2	1	2	3	2	2	1	1	1	1	4	3	4	2	4	5	2	1	5	2	2	3	2	4	2	1	1	2	3	3	2	2	2	2	1	2	1	3	2	3	4	4	5
2022-10-21 15:58:26	2	1	3	3	2	4	2	1	2	1	2	2	2	1	7	1	2	1	1	3	4	2	1	1	1	4	5	1	5	1	2	1	3	4	4	1	4	1	1	1	1	1	1	2	2	1	2	1	4
2022-10-21 17:38:36	2	1	1	1	1	4	1	1	1	3	2	2	2	2	3	2	3	3	3	3	4	4	1	2	3	4	4	3	3	2	3	3	3	3	3	2	3	2	2	3	3	2	2	2	2	2	2	2	3
2022-10-21 20:17:15	2	1	3	2	2	4	1	1	1	3	2	2	2	1	2	2	1	2	3	3	4	4	3	2	2	3	3	2	3	3	3	3	2	2	3	2	4	1	1	2	2	2	1	2	2	2	3	2	2
2022-10-22 09:32:51	2	1	2	2	7	4	1	2	2	3	2	1	1	2	6	1	2	2	2	2	2	2	2	2	2	2	2	3	3	2	2	3	2	3	3	2	4	3	3	4	2	2	2	2	3	3	3	2	2
2022-10-22 10:05:56	2	1	1	2	2	1	1	2	1	1	2	2	1	3	8	1	2	1	1	3	4	5	1	2	4	3	5	4	4	4	3	3	3	3	3	4	5	2	1	2	2	1	1	2	1	2	2	1	1
2022-10-22 10:35:48	2	1	1	1	7	4	1	1	2	4	5	1	1	2	3	3	5	2	5	1	4	1	2	1	4	2	1	5	2	1	5	3	3	3	3	4	5	5	5	5	2	3	2	3	3	3	2	4	4
2022-10-22 13:44:13	2	1	2	3	2	4	1	1	2	3	4	2	2	1	3	1	2	2	3	2	1	1	3	1	2	2	2	4	3	3	2	2	3	3	3	3	5	4	5	2	3	3	2	2	2	2	2	2	4
2022-10-22 15:21:39	2	1	3	2	7	4	1	2	2	3	4	1	2	1	3	1	3	2	4	2	4	2	1	2	2	3	4	1	2	2	2	3	3	3	3	1	2	1	1	2	3	1	1	1	1	1	1	2	3
2022-10-22 16:59:07	2	1	1	1	7	4	1	2	2	3	4	1	1	2	2	2	4	2	2	2	2	2	1	3	3	3	3	4	4	2	2	2	2	3	4	1	2	1	2	1	3	1	1	1	2	2	1	3	3
2022-10-22 18:05:14	2	1	1	2	1	4	1	2	2	4	2	3	1	1	2	1	5	2	5	1	5	1	1	1	5	1	5	5	5	5	5	5	5	5	5	1	5	5	5	5	3	1	1	5	5	5	5	1	1
2022-10-22 18:51:15	2	1	1	1	7	3	1	1	1	2	2	1	1	2	5	3	2	2	2	3	2	2	4	2	4	5	5	2	2	5	2	5	4	5	4	4	1	5	2	3	3	4	4	2	1	2	1	3	2
2022-10-22 20:03:06	2	1	1	1	3	2	1	2	2	1	2	3	1	1	3	1	3	2	3	2	4	2	3	1	3	3	5	4	2	3	3	3	2	3	3	2	4	2	2	2	4	2	2	2	2	3	3	2	2
2022-10-22 20:14:29	2	1	2	2	3	4	1	2	1	1	4	2	2	2	1	1	5	5	5	3	2	4	3	1	2	4	3	4	2	2	2	4	3	4	4	2	2	2	1	2	1	1	1	2	2	2	2	4	5
2022-10-22 23:51:28	2	1	2	2	3	3	1	1	2	1	4	1	1	3	3	1	4	4	5	3	4	4	5	1	1	5	5	3	4	5	4	2	3	3	3	1	1	1	1	1	1	1	1	2	2	2	2	1	4
2022-10-23 10:22:07	2	1	1	2	7	4	1	1	2	2	2	2	1	1	3	2	2	2	3	4	4	4	2	2	4	4	4	4	3	3	2	2	3	4	3	4	4	4	2	4	2	2	2	2	2	3	4	4	2
2022-10-23 11:37:43	2	1	1	2	2	4	2	1	1	1	2	3	1	3	3	3	2	2	2	4	2	4	1	3	5	1	4	4	5	4	3	2	2	4	5	3	4	2	2	2	1	2	1	3	2	4	2	2	1
2022-10-23 11:46:43	2	1	1	2	2	3	2	1	2	1	2	3	1	1	1	4	4	2	3	2	2	4	1	4	4	4	3	3	4	4	3	4	4	5	5	3	2	2	2	2	1	1	1	2	4	5	3	3	5
2022-10-23 12:06:12	2	1	1	2	7	4	1	2	2	3	1	3	1	3	1	1	5	5	5	4	2	5	2	4	3	5	5	5	4	5	3	3	3	4	4	1	5	2	4	2	2	2	2	2	2	2	2	2	4
2022-10-23 12:35:43	2	1	1	2	7	1	1	2	2	3	3	2	1	3	1	1	4	3	2	4	2	2	4	1	1	2	4	4	5	4	5	2	2	5	5	4	2	1	1	4	4	1	2	2	3	1	1	5	5
2022-10-23 13:01:05	2	1	1	2	7	4	1	2	2	3	2	2	1	2	3	2	4	4	4	3	2	4	2	1	2	2	2	4	4	2	4	3	2	2	3	1	3	3	3	2	3	2	2	2	2	1	1	2	2
2022-10-23 13:01:08	2	1	1	2	7	4	1	2	2	4	4	2	1	3	8	1	2	3	4	3	4	4	3	1	2	4	4	3	3	2	4	5	3	5	5	2	2	3	3	2	2	2	2	2	1	1	1	2	5
2022-10-23 15:05:41	2	1	3	3	1	4	1	2	2	3	2	3	2	2	3	2	4	2	5	2	2	4	2	2	5	2	2	4	4	2	2	4	2	4	2	2	5	2	2	2	2	2	2	5	2	2	5	2	2
2022-10-23 15:30:03	2	1	1	2	7	4	1	2	2	4	1	1	1	1	3	1	4	2	5	2	4	4	4	1	2	4	4	4	4	2	2	2	3	4	4	1	4	3	2	4	2	1	2	4	2	2	2	2	4
2022-10-23 15:45:56	2	1	3	4	7	3	1	2	1	1	4	3	2	2	4	1	2	1	1	3	2	1	2	2	4	3	4	1	3	2	2	3	3	4	2	3	2	1	2	1	2	2	2	3	3	2	2	2	4
2022-10-23 19:28:20	2	1	3	2	1	4	1	2	2	3	4	1	1	1	2	2	3	3	5	3	4	3	2	2	2	4	4	4	3	3	4	1	1	3	3	1	5	2	1	2	2	1	1	3	2	2	1	4	5
2022-10-23 20:32:47	2	1	1	1	7	3	1	2	2	3	2	1	1	1	3	1	1	1	1	1	4	4	1	1	1	4	5	4	4	4	4	2	2	3	2	2	3	2	2	2	2	2	2	2	2	2	2	2	2
2022-10-23 21:40:29	2	1	1	1	7	3	1	1	2	3	1	1	1	3	3	1	2	2	3	3	4	4	3	2	2	4	5	3	3	4	4	3	3	3	3	1	4	2	1	2	2	1	1	2	2	3	3	3	2
2022-10-23 22:37:52	2	1	1	1	7	1	1	2	2	1	2	3	1	1	4	2	2	2	3	2	4	5	3	2	3	4	5	4	4	3	2	2	3	4	2	2	2	4	2	2	4	2	1	2	3	4	3	2	1
2022-10-23 22:39:46	2	1	1	1	3	4	1	2	2	3	2	3	1	3	3	2	5	4	4	2	3	5	2	5	5	5	5	3	2	4	3	3	2	3	3	1	2	2	2	2	5	1	1	2	3	2	2	3	4
2022-10-24 07:12:50	2	1	1	1	1	4	1	2	2	2	2	1	1	3	8	1	2	2	3	2	4	3	2	1	1	4	4	4	3	3	3	2	3	3	3	2	4	2	2	2	2	1	1	2	2	2	3	2	3
2022-10-24 08:03:20	2	1	1	2	1	2	2	1	1	2	2	1	2	2	2	2	3	3	3	2	4	4	2	2	3	4	4	4	4	3	3	2	3	3	3	2	3	2	2	2	2	2	2	2	2	2	2	2	4
2022-10-24 08:10:41	2	1	3	2	8	4	1	2	2	4	4	3	2	3	3	2	3	3	3	2	2	2	3	1	2	4	4	4	4	4	4	4	4	4	4	4	4	4	3	4	2	3	2	3	3	3	2	3	4
2022-10-24 08:12:27	2	1	3	2	1	4	1	2	1	2	4	2	2	1	1	2	3	1	2	2	2	4	2	2	4	5	5	4	4	4	4	3	4	4	4	2	4	2	2	4	4	3	3	2	2	4	3	2	4
2022-10-24 08:40:29	2	1	2	2	3	1	1	1	2	3	2	2	1	2	3	2	3	2	4	2	4	3	3	2	3	2	2	3	3	3	3	2	3	3	3	3	4	3	3	3	2	3	3	3	3	2	2	3	3
2022-10-24 08:54:08	2	1	2	3	8	2	1	2	2	3	4	2	2	1	4	1	1	1	1	1	4	4	2	1	1	5	5	3	3	4	4	2	2	3	3	3	4	2	2	2	2	1	1	1	1	1	1	2	5
2022-10-24 09:43:44	2	1	1	1	7	3	1	1	2	1	2	2	1	2	2	2	4	4	4	2	4	4	2	2	4	4	4	2	4	2	2	2	3	4	4	2	2	1	1	2	1	1	1	2	2	3	2	4	4
2022-10-24 10:18:57	2	1	1	4	7	4	1	2	1	3	4	1	2	2	4	1	2	2	1	1	4	4	1	3	4	5	5	4	4	2	5	4	3	3	3	3	2	4	4	5	4	4	1	2	1	1	2	1	2
2022-10-24 10:50:33	2	1	2	2	2	4	1	2	2	1	2	1	2	2	4	2	1	1	2	2	4	4	2	1	2	5	4	2	4	3	4	2	2	3	2	2	2	2	3	2	2	2	2	1	1	1	2	3	2
2022-10-24 10:58:08	2	1	2	2	7	4	1	1	2	3	1	3	2	3	1	1	3	2	4	2	5	4	1	3	2	4	4	5	2	5	3	2	3	4	3	1	4	2	2	2	2	2	2	2	2	2	2	2	2
2022-10-24 12:13:40	2	1	1	2	7	1	1	1	2	1	2	3	1	1	3	1	2	2	2	2	2	2	1	1	2	5	5	4	4	4	4	3	3	3	3	1	2	2	2	1	1	1	1	1	1	1	1	4	4
2022-10-24 12:18:34	2	1	1	2	7	1	1	2	2	1	2	3	2	1	3	1	2	2	2	1	2	2	1	1	2	5	5	4	4	4	4	3	3	3	3	1	1	1	1	1	1	1	1	2	2	2	1	3	3
2022-10-24 12:24:47	2	1	1	3	2	4	1	2	2	1	3	2	2	1	3	1	2	2	2	5	5	5	1	2	1	4	5	4	4	4	3	2	1	2	3	2	2	1	1	2	1	1	1	1	2	1	1	2	2
2022-10-24 12:28:15	2	1	2	2	2	4	1	1	1	3	4	1	2	2	7	5	5	4	5	2	3	1	3	2	2	1	4	4	3	2	5	1	1	3	2	2	2	1	4	4	1	2	1	1	2	1	2	5	4
2022-10-24 12:28:38	2	1	1	1	1	1	2	1	1	1	2	2	1	2	8	1	3	1	1	2	4	2	2	1	1	3	5	3	3	2	3	3	3	3	3	2	3	2	3	3	3	3	3	4	1	2	2	4	4
2022-10-24 12:36:47	2	1	1	2	2	3	1	2	2	2	4	2	2	2	2	2	2	2	2	3	4	4	2	2	2	3	4	2	3	4	3	3	3	2	2	3	3	2	2	3	3	3	2	2	3	2	2	2	3
2022-10-24 12:57:53	2	1	1	1	3	4	1	2	2	3	1	2	1	3	7	1	1	3	2	4	2	2	3	1	3	4	3	4	4	3	5	5	2	2	2	1	2	2	1	2	1	1	1	2	1	1	1	3	4
2022-10-24 13:19:12	2	1	1	1	7	1	1	1	1	1	2	1	1	2	2	1	1	1	1	1	3	2	2	2	1	4	5	4	4	4	5	2	2	3	3	2	4	1	1	2	5	2	1	2	2	2	1	2	1
2022-10-24 13:28:07	2	1	3	2	1	4	2	1	1	3	4	2	2	1	3	2	2	2	2	3	5	4	3	2	2	4	4	4	3	3	4	2	2	2	2	2	3	2	2	2	2	2	2	2	2	2	2	2	2
2022-10-24 13:56:24	2	1	2	4	7	4	1	2	2	4	1	1	1	3	1	2	5	5	5	1	3	4	2	3	4	2	5	3	3	4	2	3	2	4	3	2	4	2	4	4	2	2	2	3	2	2	2	2	2
2022-10-24 14:01:17	2	1	3	2	7	3	1	2	2	2	1	3	1	3	1	3	4	1	4	1	4	5	1	1	4	4	4	3	4	2	4	2	2	2	2	3	2	2	2	3	2	2	1	2	2	2	2	2	4
2022-10-24 14:11:02	2	1	2	2	2	3	1	1	2	1	2	1	2	1	4	1	2	2	2	4	4	4	2	2	2	3	4	3	4	4	1	2	2	2	2	3	3	3	3	2	4	3	3	2	2	1	1	3	2
2022-10-24 14:11:50	2	1	1	2	2	3	1	1	2	2	4	2	1	1	5	1	1	2	2	1	5	5	1	3	3	2	2	2	3	2	3	2	2	3	3	3	4	4	3	4	3	2	2	2	2	2	2	1	1
2022-10-24 14:18:47	2	1	1	2	7	3	2	1	2	1	4	2	1	2	1	1	4	4	4	2	4	5	3	1	1	4	5	2	4	3	3	2	2	3	3	2	4	4	4	2	2	2	2	1	1	2	5	4	2
2022-10-24 14:39:07	2	1	3	2	1	4	2	1	2	4	4	1	2	2	3	2	2	3	3	3	4	2	1	1	2	5	5	4	4	3	4	2	3	3	2	2	4	2	4	2	2	2	2	2	2	3	1	2	3
2022-10-24 14:47:23	2	1	2	2	1	3	1	1	2	1	2	2	1	1	3	2	4	4	4	3	4	4	3	3	4	4	4	4	3	2	3	3	4	4	4	2	4	2	4	2	3	2	2	2	3	4	2	4	5
2022-10-24 15:23:04	2	1	1	1	7	1	1	1	2	2	2	1	1	3	2	2	1	1	1	2	4	5	1	1	4	2	4	2	2	1	2	2	3	2	2	3	1	2	2	2	2	2	1	3	2	2	2	1	5
2022-10-24 15:28:24	2	1	1	1	3	3	1	1	2	2	2	3	1	1	6	1	2	2	3	2	4	4	3	3	4	3	5	3	3	4	4	3	3	4	4	2	2	1	2	2	2	2	2	3	2	2	1	2	1
2022-10-24 15:56:47	2	1	1	1	7	1	1	2	1	1	2	3	1	1	1	1	1	1	1	2	3	5	2	2	2	3	5	3	5	4	3	3	2	2	2	2	4	3	2	3	3	1	1	1	1	2	2	2	3
2022-10-24 16:02:47	2	1	2	3	3	4	1	2	2	3	4	1	1	2	4	2	2	2	2	2	3	4	3	2	4	3	4	3	4	4	3	2	2	3	4	3	3	3	3	2	2	2	2	2	3	3	3	3	5
2022-10-24 16:05:41	2	1	1	1	7	4	1	2	2	3	1	1	1	2	3	1	3	4	5	2	4	4	3	3	4	3	4	5	5	3	1	3	2	4	3	2	4	3	2	2	1	1	1	3	2	3	4	2	1
2022-10-24 16:55:44	2	1	3	1	5	4	1	2	2	2	2	3	2	1	1	1	2	2	4	2	5	4	1	2	1	5	5	2	4	4	3	2	2	2	3	2	2	2	4	2	1	2	1	2	1	1	1	1	1
2022-10-24 16:55:47	2	1	3	1	5	4	1	1	2	2	2	2	2	1	1	2	2	1	4	3	4	3	1	2	3	4	4	3	4	3	2	2	2	2	2	1	2	2	2	2	3	2	2	2	1	1	2	2	2
2022-10-24 16:56:13	2	1	1	1	2	4	1	1	1	3	2	1	1	3	3	1	2	2	2	1	5	5	1	1	2	4	5	4	4	5	4	2	2	2	2	2	4	2	2	1	2	2	1	2	2	2	2	2	1
2022-10-24 17:11:29	2	1	1	1	8	3	1	2	2	1	2	2	1	3	3	1	5	4	2	3	3	3	3	3	3	3	3	4	4	2	3	4	3	2	2	3	3	1	3	4	4	3	1	2	2	4	2	5	1
2022-10-24 17:19:56	2	1	3	3	7	4	1	2	2	4	3	1	1	1	3	1	2	2	2	3	4	5	2	2	2	4	4	2	3	3	2	3	3	3	3	3	2	2	2	2	2	2	2	3	3	3	3	3	3
2022-10-24 17:50:19	2	1	3	2	1	3	1	2	1	2	2	1	2	1	2	2	3	3	3	2	4	4	2	2	2	4	4	3	2	3	2	2	2	2	2	2	2	2	2	2	2	3	1	2	1	3	2	2	1
2022-10-24 18:09:45	2	1	3	2	1	4	2	1	2	1	2	2	2	3	3	1	5	5	5	2	2	3	4	2	4	4	3	5	5	4	3	2	1	3	3	1	4	1	2	3	3	1	1	1	2	2	1	2	4
2022-10-24 18:27:29	2	1	3	2	1	4	2	2	1	2	2	2	2	3	2	2	2	1	1	3	4	3	2	1	3	4	4	3	3	4	3	2	2	3	2	2	3	2	4	4	3	3	3	2	2	2	3	3	3
2022-10-24 18:34:12	2	1	3	2	2	4	1	2	1	2	3	2	2	1	4	1	2	1	2	4	3	3	1	1	1	3	4	4	2	3	4	2	2	2	2	1	4	1	2	2	2	2	2	2	2	2	2	2	4
2022-10-24 19:34:08	2	1	1	2	3	1	2	2	2	1	2	3	2	1	3	1	2	2	2	3	3	2	2	1	1	3	2	2	3	2	2	3	3	3	3	1	2	2	2	2	2	3	1	2	2	2	2	4	4
2022-10-24 19:36:26	2	1	2	2	3	4	1	2	2	3	2	2	1	1	3	2	3	3	4	2	3	2	2	1	2	3	4	1	3	2	3	3	3	3	2	2	2	1	2	2	3	2	2	2	2	1	1	4	4
2022-10-24 19:41:12	2	1	1	1	7	3	1	1	2	1	2	2	1	1	3	2	3	2	3	3	3	3	3	3	3	3	3	2	4	2	4	3	3	3	3	4	2	2	3	2	2	2	1	2	2	3	3	3	4
2022-10-24 19:57:36	2	1	3	3	7	4	1	2	2	3	3	3	2	2	6	2	3	3	3	2	2	2	1	1	4	2	2	2	2	2	2	2	3	2	2	2	2	2	2	2	3	2	2	2	2	2	2	3	3
2022-10-24 20:09:55	2	1	1	1	1	1	2	2	1	1	2	2	1	2	8	1	3	1	1	2	4	2	2	1	1	3	5	4	3	2	3	3	3	3	3	1	3	2	2	3	1	2	2	3	1	3	3	4	4
2022-10-24 20:16:35	2	1	3	2	3	4	1	2	2	2	4	3	2	1	1	1	1	1	2	2	4	4	2	2	4	4	4	4	4	4	3	2	2	2	2	2	3	2	4	3	2	2	3	2	2	2	4	2	4
2022-10-24 20:27:07	2	1	1	1	1	2	1	1	2	3	1	1	1	2	3	2	3	3	3	4	2	2	3	3	3	3	3	4	4	2	4	4	4	4	4	2	2	3	1	2	1	2	1	2	2	2	2	4	5
2022-10-24 22:41:40	2	1	1	1	7	2	1	2	2	1	4	1	1	1	5	1	2	4	4	2	2	2	2	5	1	5	1	5	2	1	5	2	2	2	2	4	4	1	1	2	5	4	4	2	2	2	2	1	1
2022-10-24 23:11:10	2	1	2	3	2	2	1	2	2	3	2	3	1	3	2	1	2	2	2	2	2	4	2	2	3	3	5	2	3	3	3	2	3	2	3	1	2	1	1	2	2	2	1	2	1	2	1	1	1
2022-10-25 06:14:32	2	1	3	3	1	4	1	2	2	4	4	2	1	2	3	2	5	5	5	2	4	4	2	1	3	4	4	4	4	2	3	3	3	3	3	2	4	2	2	2	2	2	2	2	2	2	2	2	4
2022-10-25 06:56:00	2	1	1	2	7	4	1	1	2	3	4	2	1	1	7	2	5	5	5	4	2	4	2	1	4	4	4	2	3	4	3	2	2	4	2	4	4	2	2	2	2	2	2	3	3	2	2	2	4
2022-10-25 07:05:35	2	1	2	3	7	4	1	2	2	3	4	2	2	1	6	2	5	5	5	2	2	2	1	2	4	3	3	2	3	4	3	2	1	2	2	2	2	1	4	1	2	2	3	2	3	2	1	1	4
2022-10-25 08:42:51	2	1	2	2	2	3	1	2	2	2	3	2	2	1	3	1	1	1	1	3	4	4	4	2	2	3	4	2	2	3	2	2	1	2	4	2	3	1	1	1	2	1	1	1	1	1	1	2	3
2022-10-25 10:03:49	2	1	2	2	7	3	1	1	2	2	2	1	1	3	2	2	3	2	2	3	3	2	2	2	2	4	4	2	2	2	2	2	3	3	3	2	2	2	3	2	3	3	3	2	1	2	3	2	2
2022-10-25 10:43:54	2	1	2	2	2	4	1	1	2	4	2	3	1	3	3	2	2	2	2	4	4	4	3	4	3	4	4	4	4	4	3	3	3	3	4	3	4	2	2	4	1	2	2	3	2	2	2	2	2
2022-10-25 11:45:11	2	1	1	2	2	3	1	1	2	3	2	2	1	1	3	2	2	2	2	4	5	4	2	2	2	4	4	4	3	4	4	3	3	4	4	4	3	2	2	2	3	2	2	2	2	2	2	3	3
2022-10-25 11:58:56	2	1	2	3	1	4	1	2	2	4	4	1	1	2	1	1	2	2	2	2	4	4	2	1	2	4	4	5	5	4	5	2	2	3	3	1	2	2	2	2	1	2	1	2	2	2	1	4	4
2022-10-25 11:59:39	2	1	1	2	2	4	1	2	2	3	2	3	1	3	3	1	3	4	4	2	3	3	2	3	3	2	4	1	2	4	3	2	2	3	3	1	4	2	3	2	1	2	1	1	3	2	2	2	2
2022-10-25 12:09:41	2	1	1	1	7	1	1	2	2	1	2	3	2	1	1	2	2	2	4	3	2	4	3	1	1	3	4	1	2	3	3	3	3	4	3	2	3	2	2	2	3	2	2	2	3	2	1	2	2
2022-10-25 12:10:39	2	1	1	1	2	4	1	1	1	4	1	3	1	1	3	2	4	4	4	4	2	2	2	2	2	3	2	2	4	2	3	3	3	3	3	2	4	2	4	1	1	2	1	2	1	2	2	2	2
2022-10-25 12:19:19	2	1	1	1	2	3	1	2	2	3	2	3	1	1	4	1	5	5	5	2	4	2	1	2	4	3	3	4	4	4	1	2	3	3	3	2	5	2	4	1	2	2	1	2	1	2	1	2	2
2022-10-25 12:19:36	2	1	1	2	5	3	1	2	2	3	2	2	1	1	1	2	4	4	4	3	4	2	3	2	2	3	2	2	3	2	3	3	3	3	3	2	3	2	2	2	3	2	2	2	2	2	2	2	2
2022-10-25 12:54:49	2	1	1	1	2	4	1	1	1	3	2	2	1	3	8	1	2	2	2	3	4	2	1	2	4	2	3	4	3	2	4	2	1	3	3	3	4	1	1	2	2	1	1	2	2	1	2	3	2
2022-10-25 13:18:34	2	1	3	3	8	4	2	1	1	1	4	2	2	2	1	1	2	3	3	3	4	5	2	2	3	3	4	4	2	5	4	2	2	2	2	2	3	1	1	1	1	1	1	2	3	2	1	3	4
2022-10-25 13:44:59	2	1	1	2	1	3	1	2	2	1	3	3	2	2	2	1	2	2	1	1	4	4	1	1	3	4	4	4	4	1	3	1	3	3	3	1	1	2	1	2	2	2	1	2	1	1	2	1	1
2022-10-25 13:49:46	2	1	3	1	2	4	1	2	2	2	4	1	2	1	3	3	2	2	2	3	4	4	1	2	1	4	4	4	3	4	2	3	3	3	3	4	4	2	2	2	2	1	1	2	2	3	2	4	4
2022-10-25 14:36:25	2	1	2	2	4	4	1	2	2	4	2	3	1	2	3	2	4	2	4	3	2	4	4	1	2	4	1	4	2	2	2	2	2	4	2	3	4	2	1	2	2	2	1	2	2	1	2	2	2
2022-10-25 15:17:36	2	1	2	2	8	3	1	1	2	2	4	2	1	2	6	1	3	3	5	2	4	4	1	1	1	3	3	2	2	1	3	2	2	3	3	5	4	2	1	2	1	2	1	2	1	3	2	1	1
2022-10-25 17:28:26	2	1	1	1	7	1	1	2	1	1	2	3	1	3	8	2	1	1	1	3	5	1	3	1	1	4	3	4	5	3	3	3	2	3	3	3	4	2	2	2	3	1	3	2	2	3	1	2	3
2022-10-25 18:05:08	2	1	1	2	7	2	2	2	2	1	2	3	1	2	6	1	2	2	3	3	3	1	1	1	1	3	3	2	3	3	3	3	2	3	3	1	1	1	1	1	2	1	1	2	2	2	1	1	1
2022-10-25 18:22:55	2	1	1	2	8	1	1	1	2	3	4	2	1	1	1	1	2	2	2	2	4	4	2	2	2	4	4	2	3	4	4	2	3	3	3	3	3	2	2	2	2	2	2	2	2	2	2	3	2
2022-10-25 19:32:30	2	1	2	2	1	4	1	1	1	3	2	2	2	3	3	1	1	2	2	3	4	3	3	1	3	4	3	4	4	3	3	2	3	3	3	2	3	2	2	2	2	2	2	3	3	3	1	3	3
2022-10-25 19:56:50	2	1	2	2	1	4	1	1	1	3	4	2	2	1	1	1	2	1	2	2	4	4	1	1	3	3	5	5	5	4	3	2	2	3	4	4	5	1	1	4	1	1	1	2	3	2	3	1	1
2022-10-25 20:11:15	2	1	2	2	2	3	1	2	2	1	2	3	1	3	8	2	1	1	1	4	1	2	1	4	2	2	5	3	3	4	2	2	2	2	2	1	1	1	1	1	1	2	1	2	2	4	2	2	4
2022-10-25 20:36:20	2	1	1	1	2	1	1	2	2	1	2	2	1	1	3	1	3	3	2	2	4	4	2	2	3	3	2	3	3	4	4	3	3	3	3	2	2	2	2	2	2	3	2	2	2	3	2	4	4
2022-10-25 20:48:31	2	1	1	2	4	1	2	2	2	1	2	2	1	1	3	1	4	4	2	2	4	4	2	2	4	4	5	4	4	4	4	3	3	3	3	2	2	2	2	2	2	4	2	2	2	3	2	4	4
2022-10-25 20:57:03	2	1	1	1	3	3	1	2	2	1	2	1	1	1	3	1	1	1	1	2	3	4	1	1	1	4	4	2	2	4	4	2	2	2	2	2	2	2	2	2	2	2	2	2	2	2	2	2	2
2022-10-25 22:38:12	2	1	2	2	3	4	1	2	2	3	4	2	1	1	3	2	2	1	2	4	4	5	2	2	2	3	4	2	3	4	3	2	3	2	3	1	4	1	3	2	2	1	1	2	2	1	2	2	4
2022-10-25 23:11:08	2	1	2	2	7	4	1	2	1	2	2	2	2	2	2	2	2	1	4	3	4	5	2	3	4	4	5	3	2	2	4	4	3	2	3	4	2	2	2	4	4	2	1	3	2	4	2	2	2
2022-10-26 09:01:20	2	1	2	2	1	4	1	1	2	3	2	3	2	1	2	2	2	2	2	2	4	4	3	2	3	4	4	3	4	2	2	2	2	4	4	2	2	2	2	2	2	2	2	1	1	2	3	4	4
2022-10-26 10:25:43	2	1	1	2	2	4	1	1	2	3	4	2	1	2	1	1	1	1	1	2	5	5	1	1	2	5	5	1	3	1	3	2	2	3	3	2	2	2	2	2	2	2	2	2	2	2	2	3	4
2022-10-26 10:46:42	2	1	3	2	1	4	2	2	2	2	2	2	2	2	4	1	3	3	4	1	4	4	1	2	2	4	4	4	4	2	4	2	1	2	2	2	2	2	4	2	2	1	1	2	2	2	2	1	2
2022-10-26 11:51:14	2	1	2	2	5	4	1	2	2	3	2	2	2	2	2	1	2	2	2	2	2	2	1	2	3	4	4	3	3	2	2	2	2	3	3	2	2	1	2	2	2	2	1	2	1	1	1	4	4
2022-10-26 12:19:05	2	1	1	2	2	4	1	1	2	3	2	3	1	1	3	3	3	2	3	2	3	2	2	3	3	2	3	4	3	2	3	2	2	2	2	2	4	2	2	3	2	2	1	2	2	2	2	2	2
2022-10-26 13:19:17	2	1	1	1	2	4	1	2	2	3	2	1	1	2	3	1	4	2	2	4	5	5	2	2	2	4	4	4	2	4	4	2	2	2	2	3	4	4	2	4	3	2	2	2	2	2	2	2	2
2022-10-26 13:29:14	2	1	1	1	2	3	1	2	2	1	2	1	1	2	2	1	3	3	3	2	1	1	2	1	1	3	2	2	1	3	2	2	2	3	2	1	4	2	1	2	5	1	1	2	2	1	2	4	5
2022-10-26 14:02:52	2	1	1	1	7	1	1	1	1	1	2	1	1	1	3	1	3	2	3	2	2	3	1	1	1	3	2	1	2	2	2	1	3	3	3	3	3	1	3	2	1	1	2	2	2	1	2	2	2
2022-10-26 14:21:34	2	1	1	1	3	4	1	1	2	2	1	2	1	1	3	1	4	3	4	2	4	4	2	1	2	4	4	3	2	2	4	2	3	4	3	2	4	2	2	2	2	2	2	2	2	3	3	2	2
2022-10-26 14:28:25	2	1	3	2	1	4	1	1	1	2	4	2	2	3	1	2	2	2	2	4	4	4	2	1	2	4	4	4	3	2	3	2	2	2	2	2	2	1	2	3	2	2	2	2	1	2	2	2	3
2022-10-26 14:49:25	2	1	1	1	8	1	1	1	2	1	4	1	1	1	2	1	3	3	3	4	2	2	3	2	3	3	4	2	3	3	3	3	3	2	2	2	3	3	3	2	3	2	2	2	2	3	2	3	3
2022-10-26 17:02:22	2	1	1	1	7	2	1	2	1	2	3	2	1	1	6	1	2	2	4	3	5	5	1	1	1	3	5	3	4	4	2	2	3	4	4	3	2	4	2	2	2	3	2	2	2	4	2	1	2
2022-10-26 17:08:20	2	1	1	1	1	4	1	2	2	2	2	1	1	3	3	1	2	3	4	1	4	2	2	1	3	3	4	1	1	1	1	3	2	3	3	1	1	1	1	2	5	1	1	1	1	1	1	3	5
2022-10-26 17:11:33	2	1	1	1	7	4	1	2	2	3	1	1	1	1	5	2	3	3	3	3	2	4	2	3	3	3	3	2	3	4	3	4	3	3	3	3	3	2	2	2	3	1	1	3	2	5	5	5	5
2022-10-26 18:48:24	2	1	1	1	7	2	1	1	2	1	4	1	1	2	1	1	2	2	2	2	2	4	2	2	2	4	4	3	2	2	4	3	3	3	3	2	2	2	2	2	2	2	1	3	2	2	2	2	4
2022-10-26 19:04:46	2	1	1	1	7	2	1	1	2	1	1	3	1	3	1	1	3	3	4	1	3	1	2	1	2	1	4	4	4	3	3	2	2	4	4	2	1	2	1	2	3	1	1	2	2	2	2	3	4
2022-10-26 19:54:36	2	1	1	1	7	1	1	2	2	1	4	2	1	1	2	2	1	1	1	3	3	3	3	3	1	4	3	3	2	2	2	2	3	3	2	2	3	3	1	2	3	3	1	2	1	2	3	2	3
2022-10-26 20:31:19	2	1	3	2	1	2	2	2	2	2	2	2	2	1	7	1	1	2	2	3	4	4	2	2	2	3	4	3	4	3	5	2	1	2	2	2	3	2	2	2	2	3	1	1	2	3	2	1	1
2022-10-26 21:33:11	2	1	2	2	7	4	1	2	1	1	4	3	2	2	2	1	1	2	2	3	4	2	2	1	1	5	5	2	4	4	2	2	2	2	1	1	1	1	2	1	3	3	3	2	2	2	2	1	2
2022-10-26 21:35:56	2	1	1	1	7	2	1	1	2	1	2	2	1	1	1	1	1	1	1	2	2	3	1	1	1	5	5	5	5	5	5	1	2	2	2	2	2	1	1	2	1	1	1	1	2	2	1	1	4
2022-10-26 21:58:25	2	1	3	3	7	4	1	2	2	4	4	3	2	1	1	1	2	2	3	2	2	2	2	1	1	2	4	3	3	2	2	2	2	2	2	2	2	1	1	2	1	2	1	1	1	2	1	4	3
2022-10-27 06:18:06	2	1	1	1	7	1	1	2	2	1	3	1	1	1	6	1	1	1	2	2	3	4	2	2	3	3	4	2	2	3	3	3	3	2	2	2	2	2	2	2	3	2	2	2	2	3	2	4	4
2022-10-27 08:59:13	2	1	1	2	1	3	1	1	1	2	3	3	2	2	1	1	2	1	2	3	5	2	2	1	2	5	5	5	5	5	5	1	1	1	1	3	2	2	1	4	2	2	2	1	1	1	1	5	4
2022-10-27 09:59:39	2	1	1	1	7	4	1	1	2	3	4	1	1	2	2	1	3	2	4	4	2	4	4	3	3	3	3	4	4	4	4	4	4	4	4	2	2	2	2	2	1	1	1	2	1	1	1	4	2
2022-10-27 10:08:44	2	1	1	2	2	3	1	1	2	2	2	3	1	1	3	4	4	3	4	1	4	4	1	2	3	3	3	2	4	4	2	2	2	4	3	2	4	2	2	2	3	1	1	2	2	3	2	1	1
2022-10-27 10:37:47	2	1	1	2	8	4	1	1	2	4	4	2	1	3	2	2	3	3	3	2	4	4	3	3	3	3	4	5	3	4	4	3	3	3	3	3	2	3	2	3	2	2	1	3	3	3	2	3	3
2022-10-27 10:57:16	2	1	2	3	7	4	1	2	1	2	2	3	2	1	3	1	2	1	2	2	3	3	2	2	1	3	3	4	3	2	3	2	2	3	3	2	4	2	2	3	2	3	2	3	2	2	3	2	4
2022-10-27 11:42:28	2	1	2	1	2	2	1	2	1	3	2	2	1	1	2	2	2	2	2	2	3	4	3	2	2	3	4	2	2	3	3	3	3	2	2	2	3	2	2	3	3	2	2	2	2	2	2	2	2
2022-10-27 13:43:26	2	1	1	1	3	3	1	2	2	3	1	1	1	1	3	1	5	4	5	4	4	3	2	2	3	3	4	2	3	3	3	2	3	4	4	1	4	2	2	2	1	2	2	2	3	2	2	3	3
2022-10-27 15:56:12	2	1	1	1	7	1	1	1	2	1	3	3	1	2	1	1	1	1	1	2	3	1	1	1	2	3	2	3	4	4	4	3	3	2	2	2	2	2	2	1	3	1	2	2	2	2	1	2	4
2022-10-27 16:20:54	2	1	2	2	2	2	1	1	2	1	3	3	2	1	4	2	1	2	2	3	4	4	2	1	2	3	3	4	2	3	3	1	3	3	4	2	2	2	1	2	2	3	1	2	1	2	2	4	3
2022-10-27 16:43:32	2	1	3	1	6	3	1	2	1	2	4	1	1	2	3	2	2	1	1	2	5	4	2	1	1	4	4	2	3	4	4	1	1	3	3	2	2	2	1	2	4	2	2	1	1	1	2	1	1
2022-10-27 16:48:11	2	1	1	2	5	1	1	2	2	2	4	2	1	1	5	4	2	5	4	2	2	4	1	4	1	2	2	2	2	1	4	3	2	3	3	2	1	2	1	2	2	2	2	2	4	2	2	1	2
2022-10-27 18:16:36	2	1	1	1	2	4	1	2	1	2	3	3	1	1	3	1	4	4	4	2	4	4	3	2	4	3	5	3	4	2	3	2	2	3	2	2	3	2	1	2	2	2	1	2	2	2	3	4	3
2022-10-27 18:30:21	2	1	1	1	3	2	1	1	2	1	1	3	2	1	7	1	5	5	3	3	4	2	1	2	3	1	4	4	4	3	2	2	3	3	5	2	4	3	1	3	1	4	1	4	4	3	3	1	1
2022-10-27 19:28:25	2	1	2	2	6	4	1	2	1	1	2	3	2	2	2	1	1	2	1	2	3	4	3	1	3	3	4	3	3	3	3	2	3	3	3	2	4	2	2	4	2	2	2	2	2	2	2	1	2
2022-10-27 19:48:43	2	1	3	1	7	4	1	2	2	2	3	2	2	2	2	2	2	2	2	2	3	3	1	1	2	4	3	3	3	4	3	3	2	3	3	3	4	2	2	2	3	2	2	2	2	2	2	2	4
2022-10-27 19:57:06	2	1	2	2	7	4	1	1	2	2	4	2	1	3	4	1	4	2	4	2	4	4	4	1	2	4	3	3	2	4	4	2	2	2	2	3	3	2	2	2	1	1	1	1	2	1	2	2	4
2022-10-27 21:17:37	2	1	1	1	7	1	1	1	1	1	2	2	1	1	3	1	3	2	4	3	2	2	2	2	2	3	4	3	3	4	4	2	3	4	4	3	1	2	1	3	3	2	2	4	1	2	3	4	2
2022-10-27 21:26:27	2	1	1	1	1	4	1	1	2	3	1	2	1	3	3	2	4	4	4	2	4	4	3	4	3	3	4	5	3	2	2	3	3	4	3	4	2	3	2	4	1	2	3	4	3	2	4	2	2
2022-10-27 21:57:24	2	1	1	2	7	1	1	1	2	1	2	3	1	3	8	1	2	2	2	2	2	1	1	3	2	3	3	3	3	2	4	2	3	3	3	2	3	2	2	2	3	2	2	2	2	2	2	3	4
2022-10-28 00:30:42	2	1	3	2	7	4	2	2	1	2	4	2	2	1	3	1	1	1	2	3	4	2	3	2	4	3	3	3	3	2	4	3	3	3	3	3	2	2	2	3	3	2	2	4	2	3	3	3	4
2022-10-28 09:06:52	2	1	1	1	5	4	1	2	2	2	1	1	1	2	3	2	3	3	3	3	2	2	2	2	2	4	4	5	4	5	2	3	3	4	4	2	4	2	4	2	3	1	1	2	3	1	1	2	4
2022-10-28 09:19:10	2	1	1	2	7	3	1	2	2	3	1	2	1	1	2	1	4	4	4	3	4	3	4	3	4	2	5	4	5	1	4	3	3	3	4	1	1	1	2	1	1	1	1	1	3	1	1	4	5
2022-10-28 09:19:26	2	1	1	1	2	3	1	1	2	2	2	2	1	3	4	1	1	1	2	1	4	4	1	2	2	4	5	2	1	4	2	2	1	1	2	1	2	1	1	1	1	1	1	2	1	2	2	1	5
2022-10-28 10:07:57	2	1	1	2	8	4	1	1	1	3	2	3	1	3	2	2	3	3	3	4	4	1	4	1	4	1	2	5	5	5	5	3	3	3	3	2	4	4	4	2	5	2	1	3	3	3	3	2	2
2022-10-28 15:29:24	2	1	1	1	2	3	1	2	2	1	2	1	1	2	3	1	2	2	4	4	4	4	2	2	3	3	4	4	4	2	2	2	2	4	4	2	4	2	2	4	4	4	2	2	2	2	2	4	4
2022-10-28 17:24:51	2	1	2	1	2	1	2	2	2	2	4	3	1	1	5	3	3	3	3	4	3	2	3	1	3	3	2	3	3	3	3	3	3	4	4	2	2	3	2	3	3	2	2	2	3	3	3	3	3
2022-10-28 18:24:44	2	1	1	1	7	3	1	2	1	3	1	3	1	1	2	1	3	2	4	2	4	2	1	2	5	3	4	4	2	2	4	3	3	3	3	3	4	1	2	3	2	1	2	2	2	2	2	2	4
2022-10-28 19:02:00	2	1	1	1	8	1	1	1	2	1	2	3	1	2	3	1	2	1	2	4	3	5	5	1	2	4	5	4	3	5	4	2	3	3	3	1	1	2	3	2	1	1	1	3	2	1	1	2	2
2022-10-28 19:09:48	2	1	3	3	1	4	2	2	2	4	4	1	1	3	4	1	3	2	4	2	4	2	5	2	2	4	4	3	2	3	3	1	2	2	2	1	2	1	1	2	2	1	1	1	1	1	1	2	3
2022-10-28 19:24:16	2	1	1	1	3	1	1	2	2	1	1	2	1	1	2	1	1	2	3	4	2	2	1	1	1	1	2	2	2	5	4	2	3	3	3	1	2	2	2	1	3	2	1	2	2	3	2	4	4
2022-10-28 20:02:42	2	1	1	2	7	1	1	1	1	1	4	1	1	2	4	1	2	2	2	3	2	3	3	3	1	2	2	3	3	4	3	2	2	3	3	3	3	2	3	2	2	2	1	2	2	1	1	3	4
2022-10-28 20:05:36	2	1	1	2	2	1	1	1	2	1	2	3	1	2	2	1	3	1	2	4	4	3	2	1	2	4	4	2	2	2	3	1	1	2	2	2	1	1	2	2	5	2	2	2	1	1	1	2	3
2022-10-28 20:14:36	2	1	1	2	1	4	1	1	2	1	2	1	1	3	4	1	3	3	3	2	4	5	3	2	2	3	4	4	3	4	4	2	3	3	3	3	4	2	2	3	2	3	2	2	2	1	2	2	2
2022-10-28 21:58:06	2	1	2	2	4	4	1	1	2	1	3	2	2	2	6	1	2	2	1	2	5	5	2	1	2	3	5	3	5	5	5	3	3	3	3	4	4	2	4	2	2	2	2	2	2	2	2	4	2
2022-10-29 08:14:07	2	1	1	2	2	2	1	2	2	3	2	3	1	1	1	1	1	1	2	2	4	1	1	1	2	4	4	4	2	2	4	2	2	2	2	3	2	2	2	2	1	2	2	2	2	2	2	1	1
2022-10-29 09:32:09	2	1	2	1	1	3	1	2	1	2	3	3	2	2	3	1	2	2	2	4	3	4	2	2	3	2	4	2	2	3	3	2	2	2	2	1	2	2	2	2	3	2	2	2	2	2	2	2	4
2022-10-29 11:23:52	2	1	1	2	2	3	1	2	2	1	2	2	1	3	8	4	1	1	2	2	4	4	1	1	2	3	3	3	3	3	3	2	2	2	2	2	2	2	1	5	5	2	2	2	2	2	3	3	2
2022-10-29 12:10:25	2	1	2	2	1	4	1	2	2	3	2	2	1	2	2	1	2	1	3	2	4	3	1	1	2	1	4	3	2	3	3	2	2	2	2	2	2	1	1	1	5	1	1	2	2	2	1	2	4
2022-10-29 12:35:39	2	1	2	2	7	4	1	2	1	2	4	1	1	1	3	3	3	4	5	2	2	1	4	1	2	4	5	3	4	2	4	3	3	4	4	2	4	1	2	2	2	1	1	1	3	2	1	4	5
2022-10-29 15:12:04	2	1	1	2	2	4	1	2	2	1	2	3	2	1	4	1	1	1	2	2	3	5	1	1	4	5	5	2	5	5	5	3	2	2	2	2	4	1	1	2	1	1	1	1	1	1	1	2	3
2022-10-29 15:59:44	2	1	1	2	2	4	1	2	2	3	2	3	1	1	1	1	4	3	3	2	5	5	1	4	4	1	1	3	1	1	4	2	2	3	3	2	1	2	1	4	1	2	1	2	1	1	2	1	4
2022-10-29 18:25:54	2	1	2	3	5	4	1	2	2	4	4	1	2	2	1	2	4	2	3	2	2	2	2	4	2	3	4	4	3	4	3	2	2	4	4	2	2	2	2	2	3	2	2	2	2	2	2	3	4
2022-10-29 18:26:34	2	1	2	2	3	4	1	1	2	3	2	1	1	1	3	1	2	2	1	4	5	2	1	2	3	1	4	2	4	2	4	4	3	4	4	1	2	1	4	2	2	1	1	2	2	2	2	1	2
2022-10-29 18:35:21	2	1	2	3	5	4	1	2	2	4	4	1	2	2	1	2	2	4	3	3	2	2	2	4	2	3	1	5	4	4	3	2	1	3	4	2	2	1	2	2	4	2	2	2	2	1	3	4	4
2022-10-29 19:49:49	2	1	1	1	1	1	1	2	2	2	2	1	1	1	2	1	2	1	1	2	2	2	2	1	3	4	4	2	3	2	4	2	2	4	4	2	2	2	2	2	2	1	2	2	1	1	1	1	2
2022-10-29 19:56:50	2	1	2	2	3	3	1	2	2	2	2	3	2	1	4	2	2	3	2	4	2	4	2	2	3	3	4	4	4	4	4	3	3	2	2	2	2	2	2	2	3	2	3	3	4	3	2	4	2
2022-10-29 19:59:07	2	1	2	2	3	3	1	1	2	2	2	1	1	1	4	2	2	2	3	3	2	3	2	2	4	3	2	2	3	3	4	2	1	3	2	2	2	3	3	2	3	2	2	2	2	2	2	3	4
2022-10-29 20:03:51	2	1	3	3	1	3	1	2	1	2	3	1	2	1	4	3	2	4	3	2	4	4	2	3	3	2	2	4	4	4	3	3	2	2	4	3	2	3	3	2	2	4	4	2	3	2	3	3	2
2022-10-29 20:10:02	2	1	1	1	7	4	1	2	2	4	1	2	1	2	3	1	3	2	3	2	3	2	2	2	2	3	4	3	3	2	3	2	3	2	3	2	2	2	2	1	1	2	1	2	3	3	2	3	4
2022-10-29 20:11:27	2	1	1	1	3	4	1	1	2	3	1	1	1	1	3	2	4	4	2	4	4	2	2	1	2	4	4	4	3	2	4	2	4	4	4	3	4	2	4	2	2	2	2	3	3	3	3	2	2
2022-10-29 20:47:06	2	1	2	2	7	4	1	2	1	4	4	2	1	1	1	1	2	3	3	3	3	3	3	2	2	4	4	3	3	3	4	2	2	2	3	3	3	3	3	2	3	2	2	2	2	3	3	3	3
2022-10-29 21:46:01	2	1	2	3	1	4	1	1	1	3	2	1	2	2	2	2	4	3	3	2	2	2	2	2	4	2	2	4	2	2	2	4	2	2	2	2	2	2	2	3	2	2	2	2	2	3	2	2	4
2022-10-29 21:54:43	2	1	2	2	7	2	1	2	1	1	4	2	2	1	4	2	1	1	1	2	4	4	2	2	3	4	4	4	3	4	4	2	2	2	2	2	3	2	2	4	2	2	2	2	2	2	2	1	1
2022-10-29 22:54:22	2	1	1	1	8	2	1	2	1	3	4	1	1	2	3	3	4	4	4	3	3	3	5	2	2	3	4	4	3	4	3	2	2	3	4	3	3	3	3	4	3	3	3	3	3	2	2	2	2
2022-10-29 23:54:27	2	1	1	1	2	4	1	1	1	2	2	3	1	2	2	2	2	1	1	2	4	4	1	2	5	2	4	4	3	4	3	3	2	2	2	1	4	1	2	2	2	2	1	2	2	2	2	3	4
2022-10-30 08:41:32	2	1	1	1	7	4	1	1	1	4	2	2	1	1	2	1	1	1	1	2	4	4	4	1	1	4	5	4	3	4	3	2	2	2	3	2	2	2	2	3	3	4	3	2	2	2	2	1	1
2022-10-30 09:01:37	2	1	1	2	7	4	1	2	2	4	1	1	1	1	1	1	1	2	2	4	4	4	4	1	1	3	4	3	5	5	5	2	3	3	3	2	5	5	4	3	3	2	4	1	2	3	2	2	1
2022-10-30 09:39:04	2	1	1	1	1	4	1	2	2	3	2	1	1	3	2	1	4	5	5	3	4	2	2	3	3	4	4	4	3	4	2	4	3	3	3	1	4	2	2	2	2	2	1	2	2	2	3	4	4
2022-10-30 09:51:23	2	1	1	1	7	1	1	1	1	1	2	1	1	2	3	2	2	1	2	2	4	1	1	3	3	3	3	2	4	2	3	3	3	3	3	2	1	2	2	2	2	2	2	3	2	2	2	3	4
2022-10-30 10:56:52	2	1	1	1	2	3	1	1	2	3	4	2	1	2	1	2	4	4	5	2	4	4	2	1	3	4	5	4	3	4	3	3	3	3	3	2	2	2	2	2	1	1	1	2	2	1	2	2	4
2022-10-30 10:59:33	2	1	3	3	1	4	1	2	2	3	4	1	2	2	3	2	3	3	3	2	4	2	2	2	1	4	4	4	2	2	2	2	2	3	3	2	4	1	4	2	2	2	2	1	1	1	2	3	3
2022-10-30 11:50:21	2	1	3	3	2	2	1	2	1	1	3	3	2	1	4	2	1	1	1	2	3	3	2	1	2	1	1	1	2	1	2	2	2	1	3	4	5	2	4	4	3	2	3	1	2	1	2	3	4
2022-10-30 11:56:36	2	1	2	3	6	3	1	1	2	1	4	1	2	1	4	2	1	1	1	3	4	4	1	2	1	3	4	1	2	4	3	3	3	2	2	2	1	2	1	2	3	2	2	1	4	2	2	3	2
2022-10-30 12:22:56	2	1	1	1	7	2	1	1	2	1	2	3	1	1	3	1	3	3	3	4	4	4	1	2	3	2	3	2	2	4	3	2	2	3	4	3	5	2	4	2	1	1	1	2	2	2	2	2	2
2022-10-30 13:07:46	2	1	1	1	2	4	1	2	1	3	1	3	1	1	2	2	3	3	3	1	3	5	1	3	3	3	2	4	2	4	4	3	3	3	3	4	2	2	2	2	1	2	1	2	2	2	2	3	2
2022-10-30 14:50:17	2	1	1	2	7	4	1	2	2	3	4	1	1	1	3	2	2	4	4	2	4	4	2	1	2	4	5	3	3	3	2	2	3	3	4	2	2	2	2	2	1	2	1	2	2	2	2	3	3
2022-10-30 15:01:20	2	1	1	2	7	1	1	2	1	2	3	2	1	1	3	1	1	1	1	2	2	3	2	2	2	2	3	3	2	2	5	2	3	3	2	2	2	2	2	2	1	2	2	2	2	3	2	2	4
2022-10-30 15:48:34	2	1	1	1	7	1	1	1	1	1	2	2	1	3	2	1	2	2	2	3	4	4	2	1	1	5	5	3	4	3	4	3	3	4	4	2	3	2	3	4	1	2	1	3	1	1	5	1	3
2022-10-30 16:02:52	2	1	2	2	2	4	1	1	1	2	2	3	2	1	3	1	2	1	3	3	5	4	1	1	2	5	5	4	4	4	3	2	3	5	5	3	4	3	2	3	2	2	2	2	2	2	2	1	1
2022-10-30 16:27:51	2	1	1	1	1	3	1	1	2	3	2	1	1	2	2	1	1	2	1	1	2	1	2	2	2	2	2	2	2	2	2	1	2	1	2	2	2	2	2	2	2	1	2	1	2	1	2	2	1
2022-10-30 16:29:28	2	1	3	2	2	4	1	1	2	3	4	2	1	3	3	1	2	2	3	4	5	3	3	2	1	2	4	2	5	3	4	2	2	1	2	2	4	1	2	1	1	1	1	2	1	1	1	2	3
2022-10-30 16:45:32	2	1	1	1	1	4	1	1	2	3	1	3	1	1	3	1	5	2	5	3	4	5	5	1	3	4	5	5	1	4	5	1	2	3	2	2	2	1	3	2	2	2	1	5	2	3	3	3	5
2022-10-30 17:35:11	2	1	1	2	7	4	1	1	2	3	2	3	1	1	3	2	2	2	2	2	2	3	2	3	3	4	4	3	3	4	3	3	3	3	3	3	2	3	3	3	2	2	2	2	2	2	2	2	2
2022-10-30 17:35:12	2	1	1	2	1	4	1	1	1	3	1	3	2	2	2	1	2	2	2	2	4	4	1	1	2	4	4	2	2	3	3	2	3	3	3	2	2	1	1	2	4	3	3	3	3	2	1	2	1
2022-10-30 17:41:25	2	1	1	1	7	4	1	2	1	4	2	3	1	2	2	1	2	2	3	2	3	2	2	3	3	3	4	4	4	4	3	3	3	3	3	4	4	2	1	2	2	2	2	3	3	3	3	2	1
2022-10-30 17:45:14	2	1	2	2	1	4	1	2	1	2	2	2	2	1	4	1	1	1	1	2	3	4	2	1	3	3	4	3	2	3	3	3	3	3	3	2	2	1	1	2	2	2	2	2	2	3	3	3	4
2022-10-30 17:49:53	2	1	1	1	1	4	1	2	2	2	1	2	1	1	1	1	4	2	3	2	2	4	3	1	3	5	5	3	4	4	4	3	3	3	4	1	2	2	2	2	2	2	2	4	2	5	5	3	4
2022-10-30 18:16:21	2	1	2	2	1	4	1	2	2	3	4	2	2	3	1	1	2	2	3	3	5	5	1	1	2	5	4	4	5	4	3	2	3	5	5	2	4	4	4	2	2	3	2	2	1	4	3	4	4
2022-10-30 18:37:31	2	1	1	1	7	1	1	1	2	1	2	3	2	1	3	1	1	1	1	4	4	5	2	2	2	3	4	3	4	2	2	2	2	2	2	3	2	2	3	2	2	2	2	2	2	2	2	2	4
2022-10-30 18:58:31	2	1	1	1	7	3	1	2	1	1	2	1	1	1	3	1	1	1	1	4	3	4	4	2	2	3	4	3	2	3	3	2	2	2	2	3	3	3	3	2	1	2	2	2	2	2	3	4	4
2022-10-30 18:59:06	2	1	1	1	2	4	1	2	2	2	1	2	1	3	8	1	2	2	2	2	4	1	2	2	2	2	1	4	4	3	3	2	2	2	2	4	2	4	4	1	1	1	1	2	2	2	2	4	4
2022-10-30 19:08:12	2	1	1	1	7	4	1	2	2	4	2	3	2	1	8	1	3	3	3	2	4	4	2	2	2	4	4	3	4	4	4	2	2	3	2	2	4	2	2	2	2	2	2	2	2	2	2	2	2
2022-10-30 19:47:02	2	1	1	2	3	4	1	1	2	3	2	1	1	1	8	1	3	3	3	2	2	4	1	1	1	3	4	3	4	4	4	2	3	3	3	2	3	2	2	2	3	2	1	4	4	4	2	2	3
2022-10-30 19:59:22	2	1	1	1	1	2	1	2	1	3	3	1	1	2	6	1	3	3	3	2	4	5	4	1	1	3	5	3	2	3	3	2	3	4	4	1	1	1	1	2	3	2	2	2	1	1	1	4	4
2022-10-30 20:03:23	2	1	2	2	1	3	1	2	2	3	2	2	2	1	6	1	1	1	1	3	4	4	1	1	2	3	3	3	3	3	2	3	2	4	4	2	3	1	1	1	2	2	1	1	2	1	1	3	4
2022-10-30 20:08:31	2	1	1	2	7	2	1	2	2	2	3	3	1	1	3	2	2	2	2	2	4	3	2	3	2	3	4	3	3	4	2	3	3	2	3	3	4	2	3	3	3	2	2	2	3	2	2	2	3
2022-10-30 20:20:05	2	1	1	1	2	3	1	2	2	2	2	3	1	1	4	1	2	2	2	2	4	4	2	3	3	3	4	2	2	2	2	2	2	2	2	2	1	1	1	2	1	1	2	3	2	2	3	2	2
2022-10-30 20:21:37	2	1	1	1	3	4	1	1	2	3	2	3	2	1	3	2	4	5	5	2	4	4	2	2	3	3	4	3	2	2	2	4	3	3	4	3	2	2	2	4	2	2	2	2	3	3	2	2	2
2022-10-30 20:38:36	2	1	2	2	3	4	1	2	1	3	4	3	1	1	3	2	4	2	5	2	4	4	2	2	2	4	3	4	5	5	1	2	3	4	4	2	2	2	1	5	2	3	2	2	2	1	2	2	5
2022-10-30 20:58:10	2	1	1	1	1	3	1	2	2	3	2	1	1	2	2	1	2	1	2	1	2	2	1	1	1	2	1	1	2	2	1	1	1	2	1	1	2	1	1	1	1	2	1	1	2	1	1	1	1
2022-10-30 22:10:18	2	1	1	2	2	3	1	2	2	2	1	2	2	1	2	1	3	2	2	2	2	2	2	1	3	2	3	3	3	3	3	3	3	3	3	3	4	3	3	4	1	1	1	4	2	2	1	1	1
2022-10-30 22:21:51	2	1	1	1	7	3	1	1	2	3	2	1	1	1	1	1	4	4	4	3	4	3	2	3	3	2	4	3	4	2	3	2	3	2	2	2	3	2	1	1	1	2	2	3	3	3	3	3	4
2022-10-30 22:51:20	2	1	1	1	1	3	1	2	2	2	2	2	1	1	5	2	2	3	4	2	3	4	2	2	3	4	4	4	4	3	3	3	3	3	3	1	4	2	2	2	1	1	1	1	1	2	3	3	3
2022-10-31 02:12:46	2	1	1	2	7	4	1	2	2	3	4	3	1	1	4	1	3	3	4	1	1	2	1	1	2	3	3	1	2	2	3	2	3	3	3	2	2	2	2	2	3	1	2	2	2	3	2	3	4
2022-10-31 07:05:37	2	1	1	1	1	3	1	2	2	2	2	2	1	1	5	2	2	2	1	2	4	5	1	2	3	3	5	4	4	3	3	3	3	3	3	2	2	3	2	2	2	1	1	2	2	3	3	3	4
2022-10-31 07:08:58	2	1	1	2	7	4	1	1	2	2	1	2	2	1	3	2	3	3	3	2	4	2	2	2	3	2	4	4	4	2	3	3	3	4	4	3	4	3	2	4	3	2	3	2	2	2	2	3	4
2022-10-31 08:50:32	2	1	1	1	7	1	1	2	1	1	4	2	1	1	1	2	3	3	3	2	2	3	2	3	2	3	4	2	2	2	4	3	3	3	3	2	2	2	3	2	2	2	1	3	2	2	3	2	4
2022-10-31 10:19:05	2	1	3	3	7	4	1	1	2	3	4	2	2	1	2	1	4	2	2	2	4	5	2	1	3	4	4	3	4	4	3	2	2	3	3	1	3	2	2	2	2	2	2	2	1	2	2	3	2
2022-10-31 10:43:39	2	1	1	2	7	1	1	1	2	1	2	2	2	1	2	2	3	2	3	2	3	2	1	4	3	2	3	4	3	3	3	2	2	2	2	4	3	1	2	3	3	2	2	3	2	3	2	3	1
2022-10-31 11:04:07	2	1	3	3	4	4	1	2	2	2	2	3	1	1	1	3	2	2	2	3	4	2	2	2	1	2	4	2	3	4	3	3	2	2	2	2	2	1	2	2	2	2	1	2	1	2	2	1	2
2022-10-31 11:32:45	2	1	1	1	7	2	1	2	1	1	1	1	1	2	3	1	1	1	2	2	4	4	2	2	2	3	4	4	3	4	3	2	3	2	2	3	2	2	1	1	2	1	2	2	2	3	3	2	1
2022-10-31 11:38:31	2	1	1	1	2	4	1	2	1	4	2	3	1	1	3	2	2	1	1	3	3	2	2	3	3	2	2	3	4	2	3	3	2	3	3	2	2	2	1	1	1	2	1	3	3	3	3	3	4
2022-10-31 12:08:39	2	1	2	2	4	4	1	1	2	1	3	2	2	1	3	1	2	2	2	2	2	2	2	2	2	2	4	3	3	2	3	4	4	3	3	2	2	1	2	2	3	2	2	2	2	2	2	2	2
2022-10-31 12:26:04	2	1	1	2	7	1	1	2	2	4	4	3	1	2	2	1	2	2	2	2	4	4	2	1	2	4	5	3	2	4	4	2	3	2	2	2	2	2	2	2	2	2	2	2	2	2	2	2	2
2022-10-31 12:46:39	2	1	2	2	3	4	1	2	2	3	1	3	1	1	3	3	4	4	5	2	5	4	4	1	2	4	5	4	3	4	4	1	2	3	3	2	2	2	2	2	2	2	2	2	2	2	2	2	3
2022-10-31 12:46:43	2	1	1	1	7	4	1	1	1	3	3	3	1	3	3	1	3	3	3	2	2	2	2	2	2	2	2	3	3	1	3	3	3	4	3	2	2	3	3	2	1	1	1	2	2	2	2	3	4
2022-10-31 12:55:04	2	1	1	2	7	1	1	1	1	1	2	1	1	1	4	1	1	1	1	2	4	4	2	1	1	4	4	3	3	5	3	2	2	3	3	2	2	1	1	2	2	3	1	1	1	1	2	1	1
2022-10-31 12:59:10	2	1	2	2	3	4	1	1	2	3	2	3	1	2	3	2	3	3	2	2	4	4	2	1	2	3	3	3	3	3	4	3	3	5	4	2	4	3	2	3	2	2	3	3	2	2	2	2	4
2022-10-31 13:22:01	2	1	1	1	7	4	1	2	1	3	2	2	1	2	2	2	3	5	5	2	2	1	2	3	3	3	3	3	2	2	2	2	3	2	3	3	2	1	2	3	3	3	3	2	2	3	3	2	3
2022-10-31 13:53:33	2	1	3	1	1	4	1	2	2	3	2	2	2	2	1	4	3	2	3	4	2	3	4	2	4	2	2	2	3	2	3	4	3	3	2	2	2	2	4	4	2	2	1	3	4	2	2	2	2
2022-10-31 13:57:33	2	1	2	1	7	3	1	1	2	1	2	1	2	2	1	3	3	3	4	2	2	4	2	2	3	4	2	2	2	4	4	2	2	2	2	2	3	2	3	3	2	2	2	2	2	2	2	3	4
2022-10-31 14:26:35	2	1	1	1	7	4	1	2	2	2	2	1	1	3	3	2	2	2	4	2	5	4	2	2	4	5	5	2	4	4	5	3	3	3	3	2	2	2	2	2	2	2	1	3	2	4	2	4	2
2022-10-31 14:58:17	2	1	1	4	7	1	1	2	1	1	4	1	1	2	2	1	4	3	1	2	4	4	1	1	3	4	4	2	3	2	3	2	2	4	3	3	2	3	3	4	1	2	1	1	1	1	1	2	1
2022-10-31 15:37:02	2	1	1	2	2	1	1	1	2	1	2	2	2	1	4	1	2	2	2	3	4	4	2	2	2	4	4	3	2	3	2	2	2	1	2	2	2	4	3	2	2	2	1	2	1	2	2	2	2
2022-10-31 15:42:55	2	1	1	1	1	2	1	1	1	1	3	2	1	2	2	1	2	3	3	2	4	4	2	3	3	3	4	3	3	2	2	4	3	4	4	2	2	2	3	2	2	2	2	2	2	4	2	3	4
2022-10-31 16:16:37	2	1	2	2	7	2	1	1	1	2	4	2	2	1	3	2	2	1	1	3	4	4	2	3	2	4	4	3	3	4	4	2	2	2	3	2	2	2	2	2	2	2	2	2	2	3	2	2	1
2022-10-31 16:18:42	2	1	1	1	7	3	1	1	1	2	1	2	1	1	5	1	2	2	2	4	2	1	2	1	3	3	4	4	2	4	2	4	3	4	4	2	2	2	2	2	1	2	4	2	2	1	2	2	1
2022-10-31 16:33:44	2	1	1	1	2	1	1	2	2	1	2	1	2	1	3	1	2	1	1	3	2	4	2	1	2	2	4	1	3	3	2	3	3	3	3	3	3	3	3	1	4	3	3	3	2	3	1	2	2
2022-10-31 16:48:28	2	1	1	2	2	4	1	2	1	2	4	3	1	1	5	1	2	2	2	4	2	1	2	2	2	1	2	4	4	4	2	1	2	1	1	2	1	1	2	1	1	2	5	2	1	2	2	1	5
2022-10-31 17:16:55	2	1	2	2	2	4	1	2	2	3	2	2	1	1	3	1	2	2	3	2	4	4	2	1	1	4	4	4	2	2	2	4	3	3	3	3	3	2	2	2	1	2	1	2	2	2	2	4	4
2022-10-31 17:54:37	2	1	1	1	2	4	1	2	1	2	2	2	1	1	4	1	5	5	5	1	4	4	1	1	1	5	5	4	4	5	4	1	2	2	4	1	4	2	2	2	2	2	1	2	2	2	2	4	1
2022-10-31 18:00:10	2	1	1	2	7	2	1	2	2	1	3	2	1	1	4	4	2	2	2	4	2	5	2	2	3	4	4	3	2	3	3	2	3	4	2	2	4	2	2	2	2	2	1	2	3	4	3	3	4
2022-10-31 18:17:24	2	1	1	1	7	4	1	1	2	4	1	3	1	2	2	1	3	3	3	2	2	4	2	2	4	4	4	4	2	2	3	2	2	3	3	3	4	2	2	2	2	2	2	2	2	2	2	2	2
2022-10-31 18:30:53	2	1	1	1	7	4	1	1	1	4	1	3	1	1	3	1	4	4	4	4	2	4	2	1	4	4	4	4	4	4	2	2	2	2	2	3	4	4	2	4	2	2	2	2	2	2	2	2	2
2022-10-31 19:29:47	2	1	2	2	3	3	1	2	2	3	4	1	1	2	2	1	2	3	4	2	5	3	3	1	2	5	5	4	3	5	3	3	2	5	5	2	1	1	1	1	1	1	1	1	1	1	1	1	5
2022-10-31 19:30:19	2	1	1	1	7	1	2	2	1	1	2	3	1	3	2	3	1	1	1	3	4	2	1	1	1	3	5	5	5	3	3	3	3	3	3	3	4	2	4	3	1	2	5	4	1	2	3	4	5
2022-10-31 19:31:21	2	1	2	2	1	3	1	2	2	3	2	1	1	1	1	2	3	3	3	2	3	2	2	2	3	3	2	3	2	2	2	1	2	2	2	1	1	2	2	2	2	1	1	2	2	2	2	4	4
2022-10-31 19:46:16	2	1	3	2	1	4	2	1	2	3	4	1	1	2	1	1	3	2	3	2	5	5	1	1	3	5	5	5	3	5	5	1	1	1	3	2	4	3	4	2	1	2	1	2	1	3	1	4	4
2022-10-31 19:59:04	2	1	1	1	1	1	1	2	2	1	2	1	1	1	3	1	2	2	3	1	4	4	1	2	4	1	5	4	4	3	3	3	3	4	4	2	4	2	2	4	2	2	2	4	3	3	3	4	5
2022-10-31 20:03:37	2	1	1	2	2	4	1	2	2	2	2	1	1	1	1	2	2	3	1	2	4	4	2	2	2	4	4	3	3	3	3	2	2	5	5	2	3	3	3	3	3	3	3	2	2	2	1	3	3
2022-10-31 20:07:32	2	1	2	2	7	3	1	1	2	1	3	2	2	3	1	1	3	3	1	1	5	5	1	1	1	4	5	1	1	1	2	1	1	1	1	2	2	2	2	2	2	2	2	2	2	2	1	1	4
2022-10-31 20:13:06	2	1	2	2	3	4	1	1	2	3	2	1	1	1	2	1	5	5	5	1	1	1	1	1	1	5	5	1	5	5	5	3	3	3	3	1	5	1	1	1	1	1	1	1	1	5	5	5	5
2022-10-31 20:35:44	2	1	1	2	7	2	1	1	2	1	2	3	2	1	4	1	1	1	1	2	4	4	3	2	1	2	4	2	3	3	3	2	2	2	2	2	2	1	1	2	2	2	2	3	2	2	2	5	5
2022-10-31 20:39:31	2	1	1	2	7	4	1	1	2	2	4	1	1	3	2	2	4	4	4	3	3	3	2	2	3	2	2	2	4	2	3	2	3	4	4	3	3	2	4	2	3	2	2	2	2	2	2	4	4
2022-10-31 20:54:18	2	1	1	1	8	1	1	2	1	1	2	1	2	2	1	1	1	1	1	3	4	3	2	3	2	4	4	2	4	3	4	3	4	2	3	2	3	2	2	2	2	2	2	2	1	1	1	2	2
2022-10-31 20:57:31	2	1	1	3	8	1	1	2	2	1	2	2	1	2	1	1	2	1	2	3	2	2	3	3	1	2	3	2	3	3	3	3	3	3	3	3	3	3	3	2	3	2	1	2	2	2	1	3	3
2022-10-31 21:00:37	2	1	2	2	1	4	1	1	1	1	2	3	1	1	3	1	1	1	1	3	3	4	2	1	3	3	4	4	3	4	3	2	2	3	3	2	4	2	2	2	1	1	1	2	1	1	1	1	1
2022-10-31 21:03:09	2	1	2	2	7	4	1	1	2	2	4	2	2	1	4	1	3	2	3	1	2	3	2	2	2	2	2	4	3	2	2	2	2	2	2	2	4	4	2	4	2	2	2	2	2	2	2	2	2
2022-10-31 21:05:07	2	1	1	2	7	4	1	2	1	4	4	2	1	3	3	2	3	3	3	3	4	4	5	2	3	3	3	4	3	2	3	2	2	3	3	3	2	2	2	3	1	1	2	2	2	3	3	4	4
2022-10-31 21:07:06	2	1	2	2	1	4	2	2	2	3	2	2	1	3	1	2	4	4	4	3	4	4	1	2	3	3	5	3	4	4	2	2	3	4	4	3	4	4	2	4	1	2	1	3	2	2	1	3	4
2022-10-31 21:14:27	2	1	1	1	7	3	1	2	2	3	2	3	1	2	1	1	2	2	3	4	3	5	4	1	3	4	2	2	4	2	4	4	3	4	4	2	2	3	2	2	2	2	1	2	2	3	3	4	4
2022-10-31 21:23:11	2	1	2	1	7	4	1	1	2	4	3	2	1	1	4	2	2	3	3	4	4	4	2	2	2	4	4	4	2	4	2	2	2	2	4	4	4	3	2	2	4	2	2	2	2	4	4	3	4
2022-10-31 21:30:45	2	1	2	2	7	4	1	2	2	3	1	2	1	1	5	2	4	3	5	2	4	2	1	1	2	5	4	5	2	3	4	2	3	2	4	4	1	1	2	2	1	2	1	2	1	1	1	5	3
2022-10-31 21:34:28	2	1	3	3	1	4	2	2	1	3	4	2	2	1	2	2	3	2	3	2	4	4	1	2	4	4	5	2	2	4	3	2	2	2	2	4	4	2	4	2	2	3	2	2	2	2	2	2	4
2022-10-31 21:58:09	2	1	3	3	1	4	2	1	1	3	4	2	2	1	2	2	2	2	4	2	4	4	2	2	4	4	4	2	2	2	3	2	2	2	2	4	4	4	4	3	2	2	2	2	2	2	2	2	4
2022-10-31 22:01:43	2	1	1	2	7	4	1	1	2	3	1	3	1	2	3	1	4	2	3	1	2	1	3	1	2	3	5	1	3	3	1	1	2	2	3	4	2	1	3	2	5	2	1	2	1	2	1	1	2
2022-10-31 22:10:32	2	1	1	1	7	2	1	1	2	1	2	2	1	1	3	2	1	1	2	3	3	2	3	2	2	4	5	3	3	3	3	3	3	3	4	2	2	1	1	2	1	2	1	2	2	3	3	3	3
2022-10-31 22:11:08	2	1	1	1	6	1	1	1	2	1	3	2	1	1	2	1	1	1	1	4	2	4	2	2	3	3	5	5	5	5	5	1	2	1	1	1	2	2	1	1	3	3	1	1	2	3	3	1	1
2022-10-31 22:15:48	2	1	1	1	7	4	1	2	1	3	4	2	1	3	2	2	2	2	4	3	5	5	2	2	3	3	4	3	3	3	4	3	3	3	3	3	3	3	3	3	3	2	2	2	2	2	2	3	3
2022-10-31 22:20:15	2	1	1	1	2	3	1	2	2	1	1	3	1	3	8	2	1	1	2	3	4	4	2	2	2	4	4	4	3	2	4	2	2	2	2	2	2	2	2	2	4	2	2	2	2	2	2	3	2
2022-10-31 22:54:42	2	1	2	2	6	3	1	1	2	3	3	1	1	2	4	2	2	1	2	3	3	4	2	2	2	5	4	3	2	2	2	2	2	1	3	2	4	2	4	2	2	2	2	3	2	3	2	2	1
2022-10-31 23:25:17	2	1	1	1	1	3	1	1	2	1	2	2	1	1	7	3	3	3	3	5	4	2	2	2	4	4	4	2	5	2	3	3	3	3	3	2	4	3	1	2	2	2	1	1	2	2	2	4	4
2022-10-31 23:34:22	2	1	1	1	3	4	1	2	2	3	1	1	1	1	3	1	4	4	4	2	2	2	2	2	3	3	5	3	3	3	3	3	3	3	3	2	2	2	2	2	2	2	2	2	1	3	2	3	3
2022-10-31 23:40:05	2	1	1	2	2	3	2	2	2	4	4	2	1	1	1	1	2	3	3	3	4	4	2	3	4	5	4	5	4	5	3	2	3	2	3	2	2	3	1	2	1	1	1	3	3	2	2	2	2
2022-10-31 23:45:10	2	1	3	2	7	2	1	2	2	1	2	2	2	1	3	2	1	2	2	2	4	4	2	2	2	3	3	2	2	3	3	2	2	2	2	2	3	2	2	1	3	2	2	3	2	3	3	3	2
2022-11-01 10:16:30	2	1	1	2	3	3	1	1	2	4	2	3	1	1	3	1	3	5	5	2	4	2	2	1	3	3	5	3	2	1	3	2	1	2	1	1	2	3	2	2	1	3	2	2	1	3	1	1	2
2022-11-01 15:43:49	2	1	1	2	7	1	2	1	1	2	4	3	2	1	4	1	1	1	1	1	1	1	1	1	1	1	1	1	1	1	1	1	1	1	1	1	1	1	1	1	1	1	1	1	1	1	1	1	1
2022-11-01 16:16:53	2	1	1	2	7	3	1	1	2	1	2	2	2	2	2	1	2	2	2	4	4	4	2	1	3	4	5	4	4	3	3	2	2	3	4	2	2	1	1	2	1	1	1	1	1	2	2	2	4
2022-11-02 11:38:43	2	1	3	1	4	2	1	1	2	1	2	2	1	1	2	2	1	2	1	2	1	2	1	2	3	2	3	1	2	3	2	1	2	3	2	1	3	1	2	1	2	1	2	1	3	2	2	1	2
2022-11-02 11:57:31	2	1	2	2	2	3	1	1	2	3	3	2	2	1	2	1	2	5	3	1	2	5	5	2	1	3	3	3	2	3	5	3	2	4	2	3	3	3	3	2	2	2	2	2	3	3	2	3	3
2022-11-02 12:35:33	2	1	1	2	3	4	1	2	2	3	2	1	1	1	3	1	3	2	4	2	4	5	3	2	4	3	5	3	3	2	3	3	2	2	2	2	2	2	3	2	1	3	2	2	2	2	2	3	5
2022-11-03 13:46:39	2	1	1	2	2	4	1	2	2	4	1	3	1	1	1	2	5	5	5	4	2	2	2	3	4	2	3	3	2	3	3	4	3	3	3	2	2	1	1	1	2	2	1	3	3	2	2	4	4
e986bcea8863f912	4	1	1	2	7	2	1	2	1	2	3	1	1	1	3	2	1	2	2	2	2	1	2	2	2	2	2	2	2	2	2	2	2	2	2	1	2	2	2	2	2	2	2	1	2	3	2	2	1
3e1691547b2b3235	4	1	1	1	3	1	1	2	1	1	2	2	1	1	3	2	2	2	2	2	3	2	1	2	1	2	2	2	1	2	1	2	2	2	2	2	1	2	2	1	2	1	2	2	1	2	2	1	2
e17d0c0183b37623	4	1	2	2	3	2	2	2	2	2	3	2	2	1	3	3	4	2	2	2	3	3	3	1	2	3	3	4	4	3	3	2	3	2	3	3	3	3	3	3	2	2	3	3	2	2	2	3	3
57f93569ec55093f	4	1	1	1	6	1	1	1	2	1	2	1	1	1	3	2	2	2	2	2	2	2	2	2	2	2	2	1	2	1	2	1	1	2	2	3	3	2	4	1	2	2	3	2	1	2	2	1	2
5339219bd8f3eff0	4	1	2	1	3	3	1	1	2	1	2	2	1	1	7	1	1	1	2	1	1	2	2	1	1	1	1	1	1	1	1	1	2	1	1	1	1	1	1	1	1	1	1	1	2	1	1	1	1
a6962c1b1bd34fe2	4	1	1	1	3	1	1	1	1	1	2	2	1	1	6	1	1	1	1	1	1	1	1	1	1	1	1	1	1	1	1	2	2	1	1	1	1	1	1	1	1	1	1	1	1	1	1	1	2
d7fc32fce5edd65e	4	1	1	2	2	2	1	1	1	1	2	2	2	1	2	1	1	2	2	2	2	1	2	1	2	2	1	2	2	3	3	1	1	1	1	2	2	2	2	1	1	5	5	1	1	2	2	1	1
ec8dbdd465aa8731	4	1	1	2	2	3	1	2	2	2	3	2	2	2	2	2	3	1	2	2	4	4	3	1	3	3	4	4	5	4	4	2	3	3	3	2	3	3	3	3	5	2	2	1	1	2	3	2	2
79b584d4e80bd0d3	4	1	1	1	6	3	1	2	1	3	4	1	1	1	4	2	5	5	2	2	4	4	2	1	1	5	5	5	5	5	5	3	1	1	2	2	3	3	2	2	2	2	2	2	2	2	1	3	5
ef4cf0790b9622a6	4	1	2	2	2	2	1	1	1	2	3	1	2	1	3	1	1	2	2	1	3	4	4	1	1	1	1	3	3	2	3	1	2	2	2	2	1	2	1	1	2	2	3	2	2	2	1	1	2
deae892486cdc9d5	4	1	3	1	5	3	2	1	2	1	5	1	1	1	3	1	2	1	1	1	1	1	1	1	1	1	1	1	1	1	1	1	1	1	1	1	1	1	1	1	1	1	1	1	1	1	1	1	1
d4bdaa070cb4816b	4	1	2	2	6	4	1	1	1	4	3	2	1	1	2	2	3	2	2	2	4	4	2	1	1	2	2	4	4	4	4	2	2	2	2	3	3	2	2	2	2	2	2	1	2	2	2	2	5
a20b3676cea78d02	4	1	1	1	8	1	1	2	2	2	3	3	1	3	2	1	2	1	1	3	2	2	3	3	3	3	3	5	4	5	4	3	3	3	3	2	3	2	2	3	3	3	3	1	2	2	1	4	4
4c310db6caa89edf	4	1	1	1	2	1	1	2	2	1	3	3	1	1	7	2	2	2	2	3	4	4	4	2	2	2	3	4	4	4	4	2	3	3	3	3	2	4	2	4	4	3	4	2	2	2	3	3	2
e93f3b08562b8b9c	4	1	2	2	4	3	1	1	1	1	3	2	1	2	4	2	2	2	2	4	2	2	2	2	2	3	2	4	2	2	3	2	1	2	2	2	1	2	2	2	1	2	2	2	1	1	1	2	4
4c7a11449995cbf3	4	1	2	2	7	3	1	1	1	1	4	2	1	2	3	2	3	2	1	2	2	1	2	3	2	2	1	2	1	2	2	2	1	1	2	2	1	1	1	2	2	1	1	2	2	1	1	1	2
a2fb2b3924774678	4	1	3	3	5	1	1	1	1	2	3	2	2	1	3	1	2	1	2	1	1	2	1	1	2	1	1	2	1	2	1	1	1	2	2	1	1	1	1	1	2	2	3	1	2	1	1	1	1
743b3bb57ab6262c	4	1	3	4	3	4	1	1	1	1	3	1	2	1	4	3	3	3	3	2	3	3	3	2	4	3	3	2	1	4	3	2	2	2	2	3	3	3	3	2	3	3	3	2	2	3	3	3	3
f9d0fc1ce82ff153	4	1	2	2	2	3	1	2	1	1	3	2	2	3	3	3	3	4	1	1	2	2	2	2	1	1	2	2	1	2	1	2	1	1	2	2	4	5	5	1	2	2	1	2	1	2	1	2	1
d78f2373dc4f9e52	4	1	2	2	1	2	2	1	2	1	4	2	1	2	4	2	3	2	3	2	3	3	2	2	2	2	2	3	2	3	2	2	2	1	2	3	2	2	3	2	2	3	2	2	1	2	2	2	3
4ce7282b0e52715d	4	1	3	3	3	1	1	1	1	1	2	2	2	1	3	1	1	1	1	2	1	2	1	2	1	2	1	2	1	1	2	1	1	1	2	1	1	2	2	1	1	2	2	2	1	2	1	2	1
ef641d62a28fda85	4	1	2	2	1	2	2	1	1	1	3	2	1	2	7	2	3	2	3	2	3	3	2	2	2	3	3	3	2	3	2	2	1	2	2	2	1	2	3	3	2	2	1	2	1	2	2	2	3
a353ca47fafdfa33	4	1	1	1	4	4	1	2	2	1	1	1	1	1	2	1	1	1	1	1	1	1	1	1	1	1	1	1	1	1	1	1	1	1	1	1	1	1	1	1	1	1	1	1	1	1	1	1	1
dec5fa670d538401	4	1	1	4	6	4	1	1	2	3	4	1	1	3	2	5	5	5	4	2	3	3	3	5	5	5	5	5	5	5	5	5	3	5	5	1	1	2	2	5	2	2	1	1	1	1	1	3	4
7a821a7e90e274f7	4	1	1	2	2	1	1	1	1	2	3	3	1	1	3	1	2	2	2	2	3	3	3	2	2	3	4	4	3	3	3	2	3	3	3	2	2	3	3	3	3	3	3	2	2	2	3	2	2
32a537052be272e7	4	1	1	1	6	2	1	2	2	3	2	1	1	3	3	5	5	5	5	3	5	5	1	2	3	4	3	5	5	5	5	4	4	4	4	5	5	5	5	5	2	3	4	3	3	4	3	2	2
51d240038dfcb330	4	1	1	1	6	3	1	2	1	3	4	2	1	1	4	2	5	5	2	2	4	5	2	2	1	5	5	3	4	4	5	3	2	2	2	2	4	4	4	2	2	2	2	2	1	2	2	1	4
5012028f8ae738d3	4	1	1	1	6	1	1	2	2	1	2	1	1	1	5	2	2	2	2	2	2	2	2	2	2	2	2	2	2	2	3	2	2	2	2	2	2	2	3	4	2	2	2	1	1	2	2	2	2
051a5b7534e01e8a	4	1	2	2	1	2	2	2	1	1	2	3	2	1	4	2	4	2	4	2	2	2	3	1	2	2	4	1	2	4	2	3	3	2	3	4	2	1	1	2	1	1	1	1	2	2	1	4	4
886b392142612856	4	1	2	1	7	2	1	1	1	1	2	3	1	2	3	3	3	3	3	3	3	3	3	3	3	3	3	2	3	3	3	2	2	2	2	3	3	3	3	3	3	3	3	3	3	3	3	2	2
567a0d8c7df42e39	4	1	1	4	4	4	1	2	2	4	3	2	1	1	4	2	5	2	3	2	1	1	1	2	3	2	2	3	3	2	2	3	3	5	5	2	3	1	4	2	1	1	2	1	1	1	1	3	4
e8ca699f20560513	4	1	1	1	1	1	1	1	2	1	1	1	1	1	6	1	1	1	1	1	1	1	1	1	1	1	1	1	1	1	1	1	1	1	1	1	1	1	1	1	1	1	1	1	1	1	1	1	1
791187a8a65e2737	4	1	1	2	1	1	1	2	1	2	3	2	1	1	3	2	4	4	3	4	5	5	1	2	2	5	5	2	5	2	2	2	1	1	1	2	2	3	3	3	2	2	4	2	2	2	1	2	2
1414cf704acc7572	4	1	2	2	7	2	1	1	1	2	2	1	1	2	3	2	1	1	1	1	1	1	1	2	2	2	2	1	1	1	1	1	1	1	1	1	1	1	1	1	1	3	4	2	2	2	2	1	2
e69c947e0b4b2dac	4	1	2	1	1	3	1	2	2	2	3	1	1	2	2	2	2	2	2	2	3	3	3	1	2	2	3	4	3	3	3	2	2	2	3	2	3	2	2	1	1	2	2	2	2	2	1	3	2
84f9cdc4aaf5e22c	4	1	1	2	6	2	1	2	1	1	2	2	1	1	2	2	3	3	3	2	4	2	1	1	2	2	4	2	4	3	3	3	3	3	3	2	2	2	2	2	1	2	2	2	2	2	2	1	1
b522a53afad6a797	4	1	2	1	7	1	1	1	1	1	3	1	1	1	3	1	1	1	1	2	2	2	2	2	2	2	2	2	2	2	2	3	3	3	3	3	3	3	3	3	3	3	3	3	3	3	3	2	2
293850d161664797	4	1	2	2	3	2	1	1	1	1	1	1	2	1	3	1	2	2	1	2	1	2	1	1	1	2	1	1	2	1	2	1	2	1	2	1	1	1	1	1	2	1	2	1	2	1	2	1	2
09b1186899048718	4	1	1	2	3	3	1	2	1	3	3	2	1	3	2	3	3	2	3	3	4	4	3	2	4	3	5	3	4	4	4	3	2	3	3	4	4	4	4	3	2	2	2	1	2	2	3	2	4
0dbc29ad6de545d4	4	1	3	3	3	2	2	1	1	1	4	2	2	2	2	3	2	1	3	1	2	3	4	2	3	1	3	1	4	3	2	3	3	2	3	2	3	3	2	3	2	2	3	2	3	3	1	2	3
839fd4339bbda388	4	1	1	1	4	2	1	2	2	4	2	1	1	1	2	2	3	3	3	2	2	2	1	2	2	1	1	1	2	2	2	2	2	2	2	1	1	1	1	2	2	2	2	2	1	1	1	2	3
00cf9aa302c35d25	4	1	1	1	6	1	1	2	2	4	2	1	2	2	4	3	3	3	3	3	3	3	3	3	3	3	3	3	3	3	3	3	3	3	3	3	3	3	3	3	3	3	3	3	3	3	3	3	3
955c590a7f884826	4	1	2	1	6	1	1	2	2	1	4	2	1	2	2	3	2	1	1	3	3	3	2	1	3	2	3	3	3	3	2	3	2	2	3	3	2	2	2	2	1	1	1	1	1	1	1	3	2
38619caa8687f5a5	4	1	1	1	6	2	1	2	1	1	3	2	1	2	3	2	2	2	2	2	2	2	1	2	2	1	1	2	1	1	2	2	2	2	1	2	2	3	3	2	2	2	2	2	2	2	2	2	2
e18fc7928fa18f54	4	1	1	1	2	1	1	1	1	1	3	3	1	1	3	2	2	2	2	2	2	2	2	2	2	2	2	2	2	2	2	2	2	2	2	2	2	2	2	2	2	2	2	2	2	2	2	2	2
7126bd2e2ea278a2	4	1	1	1	7	2	1	2	1	2	2	1	1	2	2	1	1	1	1	1	1	1	1	1	1	1	1	1	1	1	1	1	1	1	1	5	5	5	5	1	1	1	1	1	1	1	1	1	1
4c6489d93ecdb94c	4	1	2	2	7	2	1	2	1	2	4	2	1	1	3	1	2	2	2	2	1	4	2	1	2	2	3	2	3	3	2	2	3	3	3	2	2	1	1	2	1	1	1	1	2	2	1	3	4
b12505b87252d5b3	4	1	3	3	2	2	1	1	2	2	3	1	2	1	1	1	2	1	3	2	2	3	3	1	2	3	2	1	2	3	2	1	1	2	2	2	3	4	3	2	2	3	3	1	2	2	1	1	2
d6bf7cd5f07a767e	4	1	2	4	7	3	1	2	2	4	2	3	1	1	2	2	4	4	4	2	2	2	2	2	2	4	4	2	3	3	3	3	3	2	2	2	2	2	2	2	4	2	2	2	2	2	2	3	3
1d828677514ea2e4	4	1	1	1	2	3	1	1	1	1	2	2	1	1	6	4	3	3	1	1	4	3	3	1	4	3	4	2	5	2	2	2	2	3	2	2	4	2	3	4	2	2	2	2	3	2	2	2	2
86c96a69ccc35f94	4	1	3	1	1	2	2	1	1	1	4	1	1	1	3	2	3	3	3	1	5	4	3	1	2	3	4	5	4	3	2	3	3	3	2	2	3	3	3	3	4	4	4	2	3	3	4	2	3
1dd367d0393eeb98	4	1	2	4	2	1	1	1	1	1	3	2	1	1	7	3	2	2	1	2	3	2	1	1	2	3	2	3	4	4	2	2	2	2	2	2	3	2	3	2	2	2	2	2	1	1	2	2	1
d1f8f9f4c8d33960	4	1	1	1	6	2	1	2	1	4	4	1	2	1	2	1	1	1	1	1	1	1	1	1	1	2	2	1	1	1	1	1	1	1	1	2	2	2	2	1	2	2	1	1	1	1	1	1	1
ee1b39da779691b9	4	1	2	2	1	2	1	2	1	2	3	2	2	1	3	1	2	2	2	2	2	2	2	2	2	2	2	3	3	3	3	2	3	4	3	2	2	3	2	2	2	3	2	2	2	3	4	2	2
a8502445b6719f1d	4	1	1	1	4	1	2	1	1	1	5	1	1	1	2	1	2	1	1	2	4	4	1	1	1	2	3	2	2	3	3	1	2	1	1	1	2	2	2	1	1	1	1	1	2	1	1	2	2
c28b7edc8b59d5be	4	1	2	2	3	2	1	2	1	2	2	3	1	1	2	2	3	3	1	3	3	4	2	1	2	2	3	4	4	4	5	2	2	2	3	3	3	2	2	3	3	2	2	2	2	2	2	1	4
7c5d31003340cfa4	4	1	1	2	2	1	1	1	1	2	3	2	1	2	4	3	3	2	4	2	2	4	3	2	3	4	4	3	3	3	4	2	3	2	4	2	4	4	4	3	2	3	2	1	3	2	2	2	4
66d1034c5dedebca	4	1	2	2	2	2	1	1	1	1	4	2	1	1	3	2	1	3	2	2	3	4	3	1	1	2	2	5	4	4	4	2	2	1	2	1	1	1	1	2	2	2	2	2	1	2	1	4	3
4c97c810396babf8	4	1	1	2	6	2	1	1	1	2	4	2	2	2	3	3	1	2	4	3	1	2	4	3	1	2	4	3	1	2	4	3	2	4	1	3	2	4	5	3	2	4	5	3	2	4	5	3	2
f9564d239a96eb64	4	1	1	1	7	2	1	2	1	2	3	1	1	1	2	2	2	2	2	2	2	2	2	2	2	2	2	2	2	2	2	2	2	2	2	1	3	2	2	3	2	2	2	1	2	2	2	1	2
9200a752f43d31e1	4	1	2	1	1	1	1	1	2	1	2	1	1	1	2	1	1	1	2	1	2	1	1	2	2	2	2	2	2	2	2	2	2	2	2	1	1	1	1	1	1	1	1	2	2	2	2	3	2
ae66c365a6b1b2b0	4	1	1	1	2	2	1	2	2	2	4	3	1	1	7	1	1	1	1	1	1	1	1	1	1	1	1	1	1	1	1	1	1	1	1	1	1	1	1	1	1	1	1	1	1	1	1	1	1
46847528e55a94f0	4	1	1	2	7	3	1	1	1	3	1	1	1	3	3	1	5	5	1	1	1	1	1	3	1	3	4	1	5	5	5	3	3	5	5	1	5	1	1	1	1	1	1	1	1	1	1	1	1
99ea9388b73c729b	4	1	3	3	4	2	1	1	1	2	3	2	2	1	2	2	1	3	2	2	3	4	2	1	2	3	3	2	1	3	2	3	2	5	3	1	3	1	1	3	2	2	2	1	1	2	2	5	3
4451e0d283a46f3e	4	1	3	3	2	2	1	1	1	1	3	1	1	1	2	2	2	2	1	2	3	5	1	1	3	2	4	2	1	2	1	1	2	2	1	3	2	2	2	1	1	1	1	2	1	2	1	2	2
b4aadcad1b729323	4	1	1	1	2	1	1	2	2	1	2	3	1	2	3	2	1	1	1	2	4	4	1	1	1	4	4	4	4	3	3	1	1	1	1	3	4	3	1	5	3	1	3	1	1	1	3	2	2
e731a747e838b76f	4	1	1	4	7	4	1	2	2	4	2	2	1	1	2	3	5	3	5	2	4	4	3	2	2	4	5	3	3	3	3	3	3	3	3	2	3	2	2	2	2	2	2	2	2	2	2	3	4
6bff6b3d51c38140	4	1	1	1	6	4	1	2	1	2	3	1	1	2	1	1	1	1	1	2	1	2	1	2	1	1	2	1	2	1	2	1	1	2	2	1	2	1	2	1	2	1	2	2	2	1	2	2	2
17103826391f8713	4	1	1	1	2	1	1	1	2	1	3	1	2	1	1	1	1	1	1	1	1	1	1	1	1	1	1	1	1	1	1	1	1	1	1	3	3	3	3	1	1	1	1	1	1	1	1	1	1
9b49044acb684453	4	1	1	2	6	4	1	2	2	2	2	2	1	1	2	2	3	2	2	2	5	5	1	3	3	3	3	4	4	4	4	2	2	2	2	3	3	2	2	3	3	2	2	3	3	3	2	3	2
49527b164cda45c2	4	1	2	2	5	1	1	2	1	2	4	3	2	2	2	2	2	2	2	2	2	2	2	2	2	2	4	4	4	4	4	2	2	2	2	2	2	2	3	2	3	3	3	3	3	2	2	3	3
9fbdede9f3b55b2e	4	1	1	1	5	2	1	2	2	3	2	2	1	2	3	1	2	2	2	2	4	3	3	2	2	2	2	3	3	3	3	3	3	3	3	1	5	4	4	2	4	2	2	3	3	3	3	2	3
5f1f109e4ba7ca83	4	1	2	2	1	2	1	1	1	1	4	2	1	1	1	1	2	2	2	2	2	3	2	2	3	4	3	2	3	3	3	3	2	3	2	3	2	1	1	2	1	2	2	2	2	2	1	3	2
dea96a4c88d5850d	4	1	1	1	2	2	2	1	2	1	4	2	1	1	7	1	2	1	2	3	4	3	2	1	1	5	5	3	2	3	2	2	3	2	3	3	4	3	4	2	1	2	2	5	4	3	3	3	1
7d2f647bb136c6e4	4	1	3	2	6	4	1	2	2	3	4	3	2	1	3	1	1	1	3	1	1	1	1	1	1	1	1	1	1	1	3	1	1	1	1	2	2	2	2	1	1	1	1	1	1	1	1	1	1
a0eed5b50f4d723a	4	1	2	1	2	3	1	1	1	2	2	1	1	2	3	1	1	1	1	1	1	1	1	1	1	1	1	1	1	1	1	1	1	1	1	1	1	1	1	1	1	1	1	1	1	1	1	1	1
e066f7912d0d39d5	4	1	1	1	7	3	1	1	2	1	2	3	1	1	3	2	5	1	2	5	5	5	1	2	4	3	5	5	5	5	5	5	5	5	5	1	4	4	3	5	3	4	3	3	3	2	2	3	1
4b157cd72cf54010	4	1	3	2	1	4	1	1	1	3	3	2	1	1	3	1	1	1	1	2	1	2	3	2	3	2	1	3	2	4	3	2	3	3	3	1	2	1	3	4	3	2	1	3	2	3	4	2	2
d8c654cbaaffd91b	4	1	1	4	2	3	1	2	2	3	2	1	1	1	3	3	3	3	4	4	4	4	4	1	2	2	2	2	3	2	3	2	2	2	2	3	3	3	3	4	4	3	4	2	3	2	2	2	2
5e60fc4210000509	4	1	1	2	5	4	1	2	2	3	3	2	1	3	3	1	1	1	1	5	5	4	5	1	2	3	3	5	5	5	5	4	3	3	3	5	5	5	5	5	2	2	1	1	1	1	1	5	1
924fda912ee0986c	4	1	1	2	2	2	1	1	1	1	2	1	1	1	3	1	1	1	1	1	1	1	1	1	1	1	1	1	1	1	1	1	1	1	1	1	1	1	1	1	1	1	1	1	1	1	1	2	2
c199883d5a54f2ac	4	1	1	4	8	4	1	2	1	4	4	1	1	1	4	1	2	3	3	2	1	2	3	1	2	1	4	3	4	3	4	2	2	2	2	3	3	3	3	2	2	2	1	1	2	2	1	1	1
921c8e0f18b350b5	4	1	1	1	7	4	1	2	1	3	3	3	1	1	3	1	3	1	2	3	2	2	2	1	2	3	3	2	3	2	3	3	3	2	2	3	2	2	2	2	2	2	2	2	2	2	2	2	3
938b0e5c8319b117	4	1	1	2	2	1	1	1	1	2	4	2	1	1	4	1	2	1	2	1	2	1	2	1	1	1	2	2	1	2	2	2	1	2	1	1	1	1	2	5	4	5	3	1	1	1	1	1	2
a2b5ff6fbbf62ee3	4	1	1	1	2	2	1	2	2	2	2	1	1	2	4	1	2	2	2	3	4	4	4	2	3	4	4	4	4	4	4	2	2	2	2	3	4	3	3	4	3	3	3	2	2	2	2	2	3
c674bc8050bc8e08	4	1	1	1	8	4	1	1	2	4	4	1	1	2	2	2	4	3	4	2	3	3	3	1	2	2	2	3	5	4	5	2	2	2	3	3	4	4	2	4	2	2	2	2	2	2	2	4	4
980f8fdf6ca13e7f	4	1	2	1	3	2	1	2	1	1	2	2	1	1	3	3	3	3	3	3	2	3	3	3	3	4	3	2	3	2	3	3	3	4	3	2	2	3	3	3	3	2	3	3	3	4	4	1	3
4b655feb3250043f	4	1	1	1	2	4	1	2	1	2	2	1	1	2	3	1	3	3	3	3	4	4	3	1	2	5	5	5	5	3	3	3	3	3	3	2	4	3	3	3	1	2	1	1	1	1	1	3	2
0f7abeb0738424ea	4	1	2	1	7	2	1	1	1	3	3	1	1	1	2	3	2	2	2	3	3	4	4	1	1	3	3	4	2	2	4	2	2	1	2	3	4	4	4	2	3	3	2	3	3	2	2	1	1
2e238084a4c6d0b8	4	1	1	1	6	1	1	2	2	2	5	3	1	1	6	1	2	1	2	5	2	2	2	1	2	2	3	5	5	5	5	5	3	3	3	5	5	5	5	5	3	3	3	1	1	1	1	1	1
7bdec8c211aaeeb8	4	1	1	2	6	4	1	1	1	3	4	1	1	1	3	1	4	4	4	1	1	1	5	1	1	5	5	1	1	1	5	3	3	3	3	1	1	1	1	1	1	1	1	2	2	2	2	2	1
8d1050a781a0411b	4	1	1	2	7	4	1	2	1	4	3	2	1	3	5	1	3	2	3	3	2	3	2	1	1	5	4	4	4	4	4	2	2	2	2	3	4	2	2	2	1	1	1	2	2	2	2	3	4
2456022048c5dbf8	4	1	1	3	1	4	1	2	1	2	2	1	2	1	7	1	1	1	2	1	1	2	2	1	1	1	1	1	1	2	2	1	1	1	2	1	1	1	1	1	2	1	1	1	1	1	3	2	2
c9f126a9b930b210	4	1	1	2	6	2	1	2	1	2	4	2	2	1	3	2	4	3	3	2	2	3	3	1	3	3	4	5	4	4	3	3	3	4	4	2	3	3	2	2	1	2	2	2	2	3	3	3	4
085faeefa62f0ad7	4	1	1	1	6	2	1	1	1	3	2	2	1	1	3	3	4	4	4	3	4	4	4	4	4	4	4	4	4	4	4	5	5	5	5	4	4	4	2	5	4	4	4	1	2	3	2	3	1
d527fa12022c7ac3	4	1	1	1	2	2	1	1	2	1	4	2	1	1	2	1	1	1	1	1	4	4	2	1	2	4	4	2	4	4	4	3	2	2	2	2	2	4	4	2	2	2	2	1	2	2	3	4	3
7e40c9f5f221c31c	4	1	2	1	1	2	1	1	1	1	4	1	2	1	2	2	5	3	2	2	4	3	2	2	3	1	2	2	1	4	3	2	3	1	2	3	1	2	3	3	5	2	4	2	1	1	3	3	4
6adc37a4a8f57374	4	1	2	1	3	3	1	1	1	2	3	1	1	1	5	1	2	2	3	1	1	1	1	2	1	2	4	1	2	2	1	2	2	1	2	1	1	3	2	1	1	2	1	2	2	2	1	2	3
c439f416fdf94c70	4	1	1	1	2	1	1	2	2	3	3	2	2	1	4	2	2	1	1	2	2	2	1	2	2	2	2	3	3	3	3	2	2	2	2	1	1	1	1	2	2	1	2	2	2	2	1	2	2
c108b558f37d1faf	4	1	2	2	2	4	1	1	1	2	4	1	1	1	3	1	2	1	1	2	4	2	1	1	3	1	2	1	3	4	3	1	2	1	1	1	3	2	1	2	1	1	1	3	2	3	3	2	1
3a6fc3521828a2c3	4	1	1	1	2	3	1	2	1	2	3	3	2	1	2	3	2	2	2	3	4	4	3	2	3	4	5	5	5	5	5	4	4	4	4	3	3	3	3	4	2	2	2	3	5	5	2	5	5
d06a05638244093b	4	1	2	2	3	1	1	1	1	1	3	1	2	1	3	1	1	2	2	2	2	3	2	1	2	4	4	3	2	2	2	2	3	2	2	2	2	3	3	2	3	2	2	2	3	3	2	2	2
ed1acb9820c8b386	4	1	1	1	1	2	1	2	1	2	4	1	1	2	2	2	3	2	3	3	4	4	2	2	1	5	5	2	2	4	4	2	2	2	2	2	4	2	3	3	2	2	2	2	1	1	1	2	1
a8622bb6516d2491	4	1	1	1	4	3	1	2	1	1	3	2	1	1	4	3	4	2	3	3	3	4	2	2	4	3	3	2	3	3	2	3	2	2	3	2	3	3	2	3	1	1	1	2	2	2	2	3	4
54dcf4d405b8854f	4	1	2	1	1	1	1	1	1	1	3	2	1	1	3	1	1	1	2	3	4	4	2	1	2	3	3	2	2	2	4	3	2	2	1	2	4	3	2	2	2	2	3	2	2	1	2	2	1
216262ae85401219	4	1	1	1	1	1	1	1	1	1	3	1	1	1	3	1	2	2	1	2	1	3	2	2	2	1	2	2	3	2	1	3	3	3	2	2	3	2	2	2	2	3	1	2	3	2	1	2	1
473688a01407ddeb	4	1	1	1	6	2	1	1	2	3	4	2	1	2	3	1	2	1	1	1	3	4	1	1	1	4	4	4	4	4	4	1	1	1	1	4	4	1	1	4	1	1	1	1	1	3	2	3	2
80527d1614c98829	4	1	2	1	1	3	1	2	1	2	3	1	1	1	7	1	2	3	2	1	2	2	1	1	2	1	2	1	2	1	2	1	2	1	2	1	2	1	2	1	2	1	2	1	2	1	2	1	2
0ecdf87886b04097	4	1	1	1	6	3	1	2	1	4	4	2	1	1	3	1	1	1	1	1	1	1	1	1	1	1	1	1	1	1	1	1	1	1	1	1	1	1	1	1	1	1	1	1	1	1	1	1	1
feb551c6dc4150a0	4	1	1	1	3	3	1	1	1	3	4	2	1	1	2	2	2	2	2	2	3	4	3	3	2	2	3	4	4	4	4	2	4	4	4	2	2	2	2	3	3	3	3	2	3	4	4	1	1
1a7f6eea1ba4d45f	4	1	1	1	1	1	1	2	2	3	3	2	1	1	7	1	1	1	1	2	2	2	2	1	1	1	1	1	1	1	1	2	2	2	2	2	2	2	2	1	1	1	1	1	1	1	1	1	1
1e2f24ae0fe66e46	4	1	1	2	2	2	1	1	1	2	2	2	1	2	6	3	2	4	3	4	3	2	2	4	3	4	4	2	3	2	2	3	2	3	3	4	3	2	1	4	3	4	2	4	3	4	2	4	3
56209f7175008adb	4	1	1	1	6	1	1	1	2	1	3	2	1	2	2	3	3	3	3	2	2	3	3	2	2	2	2	1	3	2	2	3	3	3	3	1	2	2	3	2	2	2	2	2	2	2	2	2	2
78507c7f704b5d89	4	1	1	1	2	2	1	2	1	1	2	3	1	1	3	2	1	1	3	3	4	4	2	2	3	4	4	5	5	5	5	3	2	2	2	4	5	2	5	3	3	3	5	3	3	3	3	1	1
530685c4b4b20428	4	1	1	1	7	2	1	2	1	4	4	1	1	1	3	1	1	2	1	1	1	2	2	1	1	1	1	3	5	5	1	1	1	2	2	1	1	2	2	2	2	2	2	2	1	2	2	3	3
85451467e3604cd4	4	1	2	2	2	2	1	2	1	4	2	2	2	1	7	2	3	2	3	2	3	3	3	2	2	3	3	3	3	3	2	2	2	2	2	3	3	3	3	3	3	3	3	3	3	3	3	2	2
feae84ccdd1ab645	4	1	1	1	5	1	1	2	2	3	4	1	1	1	5	2	2	2	3	3	5	4	2	2	2	4	4	3	2	3	2	4	3	3	4	2	3	3	2	3	2	2	2	2	3	2	3	2	1
434bb79e654a0c15	4	1	1	1	6	4	1	1	1	4	3	3	1	2	2	2	3	3	4	3	3	3	2	2	3	4	4	4	4	2	4	2	3	4	4	3	4	3	3	4	1	2	1	2	2	2	3	2	3
67bfa2759e436238	4	1	1	2	6	4	1	1	1	4	3	3	1	3	2	3	5	5	5	1	2	2	2	1	1	1	1	4	4	2	3	3	3	3	3	3	3	3	3	2	1	1	1	3	3	3	3	3	3
b97585442d5104d3	4	1	2	1	1	2	2	2	1	1	5	2	1	1	2	1	1	1	1	1	2	1	1	1	1	1	1	1	1	1	1	1	2	1	1	1	1	1	1	1	1	2	3	1	2	2	1	1	1
b6267049d61a09f7	4	1	1	1	6	1	1	1	1	3	4	2	1	1	3	3	3	3	3	3	3	3	3	1	1	1	1	3	3	3	3	3	3	3	3	3	3	3	3	3	3	3	3	3	3	3	3	3	3
26538f1606b7d8c4	4	1	2	2	7	3	2	1	1	2	4	2	1	2	1	1	1	1	1	1	1	1	1	1	5	2	3	1	2	3	4	3	3	3	3	2	2	3	2	3	4	4	4	3	3	3	3	2	2
69f1bc095b1afdb1	4	1	3	3	7	2	1	1	2	2	3	1	2	1	1	1	2	1	2	1	2	1	2	1	2	1	2	1	2	1	2	1	2	1	2	1	2	1	2	1	2	1	2	1	2	1	2	1	2
bee2e8c41bf27524	4	1	2	1	2	1	1	1	2	3	3	2	1	1	1	1	1	1	1	1	2	1	1	1	2	2	3	4	4	4	4	1	2	2	3	3	3	3	3	3	2	2	2	1	1	1	1	3	3
db1da7f205e93d5f	4	1	2	2	1	2	1	1	1	1	4	1	2	1	3	2	2	3	4	3	2	3	5	2	2	2	3	4	3	2	1	2	2	4	3	3	1	1	4	3	4	2	2	2	2	5	5	3	2
29a529f43fd098aa	4	1	1	1	6	1	1	2	2	1	2	3	1	1	3	1	1	1	1	1	1	1	1	1	1	1	1	1	1	1	1	1	1	1	1	1	1	1	1	1	1	1	1	1	1	1	1	1	1
2de6e8864d723d2e	4	1	1	1	5	4	2	2	1	4	4	1	1	2	4	1	3	2	2	1	2	3	2	1	1	2	2	2	2	2	2	2	1	1	2	2	3	3	2	2	2	2	2	1	1	1	1	3	2
996fe25713c61fa0	4	1	1	1	6	3	1	1	1	2	4	1	1	2	2	3	2	2	3	2	3	1	3	1	3	3	3	3	4	2	3	3	3	3	3	4	2	3	1	4	2	3	1	2	2	2	3	3	2
dec3e8a2d3ca71f7	4	1	1	1	2	2	1	2	2	3	4	2	2	1	4	3	2	2	1	2	4	3	1	1	3	1	3	1	3	3	1	1	2	3	2	1	1	1	1	2	3	1	1	2	1	1	2	2	3
e35a671fe3424ce5	4	1	2	2	7	1	1	1	1	1	1	3	1	1	7	2	3	4	2	2	3	3	2	2	3	3	4	3	3	2	2	3	3	3	3	3	3	4	4	4	2	2	2	2	2	2	2	3	3
99d5cd653812a9bf	4	1	2	3	5	3	1	1	2	1	3	1	2	2	3	1	2	2	1	1	2	2	2	2	2	2	4	2	2	2	2	1	2	2	2	2	1	1	2	2	1	2	2	1	1	1	1	1	1
deb3a25e09930af1	4	1	1	1	6	3	1	2	2	4	3	2	1	1	4	3	4	3	5	4	4	4	4	2	2	1	1	5	3	4	5	2	3	3	4	4	4	4	2	4	2	3	2	1	1	1	1	3	4
232f49677653e22a	4	1	2	4	2	4	1	1	2	2	2	3	1	1	3	2	3	3	3	2	3	4	3	2	3	2	4	4	4	4	5	2	3	3	3	2	4	3	2	2	4	3	2	3	2	3	3	2	2
301d9f98f2e7a37f	4	1	1	1	2	2	1	1	1	2	2	1	1	2	3	1	1	1	1	1	1	2	1	1	2	2	1	1	1	2	1	1	1	1	1	1	1	1	1	1	1	1	1	1	1	1	1	1	1
b7d639ff038fd94a	4	1	2	1	2	1	1	1	1	1	3	1	1	2	2	1	2	1	2	2	1	3	2	2	1	3	2	1	1	5	3	2	3	1	5	1	2	3	5	1	2	1	3	2	2	2	1	1	3
fdf6306bcddfa1df	4	1	1	4	2	4	1	2	2	2	4	2	1	1	2	4	4	4	4	2	1	3	2	3	5	1	5	2	4	4	4	4	4	4	4	2	3	2	2	4	4	3	5	3	2	2	2	2	2
0575587073fb45e0	4	1	1	1	6	4	1	1	1	4	3	2	1	1	3	2	3	3	3	3	3	3	3	2	3	4	4	5	5	5	5	3	3	3	3	3	3	3	3	3	3	3	3	3	3	3	3	1	1
359e8b48a3f04533	4	1	2	3	1	2	1	1	1	2	2	3	1	1	7	1	1	1	1	2	2	1	1	1	2	1	1	2	2	3	2	2	2	2	1	1	2	1	1	1	2	1	2	1	2	1	1	2	2
c5b8b9992a9462da	4	1	2	1	6	2	1	1	1	2	4	1	1	2	2	1	2	3	2	1	2	2	3	1	2	3	4	1	2	4	5	2	3	2	2	1	1	1	1	1	1	4	5	3	3	2	1	1	2
53c2559efa6f1b37	4	1	1	2	6	4	1	1	1	3	4	2	1	1	3	5	5	5	5	5	4	5	5	2	2	2	2	3	5	5	5	3	3	3	3	3	4	4	3	4	3	3	3	3	3	2	2	2	2
c5842bec0c5f317f	4	1	2	1	3	3	1	1	1	1	4	2	1	1	2	1	4	1	1	1	4	4	1	1	1	4	4	5	5	4	4	1	1	2	2	2	2	3	3	2	2	1	1	1	2	2	1	5	2
e59435e6fd0ed446	4	1	3	2	6	4	1	2	1	1	4	3	2	1	3	1	1	1	1	1	1	1	1	1	1	1	1	1	1	3	3	1	1	1	1	1	1	1	1	1	1	1	1	1	1	1	1	1	2
86ce85bdb086314e	4	1	2	2	7	1	2	2	1	2	3	2	2	2	7	1	5	4	3	2	1	4	3	5	4	2	1	2	2	3	3	4	3	5	5	4	4	2	5	3	2	2	3	4	3	1	1	1	3
c2e3169f1fa2597c	4	1	1	1	8	2	1	1	2	1	3	2	1	1	3	1	2	3	2	1	1	2	2	1	1	4	3	1	2	2	2	2	3	3	3	1	3	1	1	3	1	1	1	1	2	2	1	2	4
f610ad00e2ff2ac0	4	1	1	2	6	3	1	1	2	2	2	3	1	2	3	2	2	2	2	2	2	2	2	2	2	2	2	2	2	2	2	3	3	3	3	2	2	2	2	2	2	2	2	2	2	2	2	2	2
554b6eab918a149d	4	1	1	2	6	4	2	2	2	4	4	2	1	3	4	1	1	1	1	1	2	1	2	1	1	1	1	3	3	2	3	1	1	1	1	1	2	1	2	1	2	1	1	1	1	1	1	1	2
4790f80f96f8381f	4	1	2	1	7	2	1	2	1	2	2	2	1	1	2	1	3	1	1	1	3	3	1	1	1	2	3	3	3	3	3	1	1	1	1	1	2	2	2	2	1	1	1	1	1	1	1	2	2
4a2d05bca8cad16a	4	1	2	1	6	1	1	2	2	2	4	3	1	1	2	1	1	1	1	1	1	1	1	1	2	1	2	1	2	1	2	1	2	1	2	1	1	1	1	2	1	1	2	1	2	2	2	1	1
d8c3deca82bb3c83	4	1	2	1	1	2	1	2	1	2	2	1	1	2	5	3	2	2	1	3	4	4	3	2	3	3	4	2	3	3	2	3	3	2	2	3	2	3	3	3	3	2	2	3	4	3	3	2	3
2225a603c8fec677	4	1	1	1	6	4	1	2	2	2	3	1	1	1	2	1	2	2	3	3	3	1	5	1	1	5	5	5	5	5	5	1	1	1	1	3	4	4	3	4	3	3	3	3	2	2	3	5	4
6b93c5a00c6976a2	4	1	1	1	1	1	1	2	2	1	2	2	2	1	3	2	2	3	3	2	3	3	3	2	3	3	2	4	4	3	3	2	2	3	3	3	3	3	3	3	3	2	2	2	3	2	2	2	3
f502b24ec2280a16	4	1	1	1	2	2	1	2	1	1	3	3	1	1	2	1	4	2	3	2	3	2	1	1	2	1	5	5	5	5	3	3	2	4	4	2	5	2	1	2	2	2	2	2	2	2	2	1	1
18869d84a43b10ca	4	1	2	3	2	1	2	1	1	1	4	2	2	1	7	2	3	2	2	3	3	4	1	2	2	3	4	1	2	1	1	1	1	1	1	2	3	1	1	1	2	1	1	1	2	2	2	1	1
aa1db989e8ba7e54	4	1	1	1	6	2	1	1	1	2	3	3	2	2	4	3	4	4	3	2	3	4	4	1	2	4	2	4	4	4	5	3	3	3	3	4	2	2	3	3	1	2	1	2	2	2	2	3	4
1cb32c1b52b80014	4	1	1	2	2	3	1	2	1	3	2	3	1	1	3	2	2	1	1	3	4	3	4	2	2	4	3	2	3	3	3	2	3	3	3	2	2	4	2	3	3	3	2	2	2	2	2	2	2
74515baae36814d2	4	1	1	2	6	2	1	1	2	1	3	2	1	2	2	2	2	2	2	1	4	4	2	1	1	4	4	4	4	4	4	1	1	1	1	1	1	1	1	1	1	1	1	1	1	1	1	1	1
b9541ebb001b210f	4	1	1	1	6	4	1	2	1	4	3	3	1	1	2	2	2	1	1	2	3	4	1	1	2	3	4	4	3	4	3	2	2	3	3	3	4	3	3	4	2	3	2	2	2	2	2	2	3
08386d263dbf877f	4	1	1	4	6	1	1	2	2	1	2	3	1	2	4	3	2	1	1	2	1	1	2	3	1	3	3	4	5	5	3	3	3	3	3	3	2	2	1	3	1	1	1	1	1	1	1	2	2
e51f102c004c13eb	4	1	1	1	5	2	1	1	1	2	2	2	1	2	4	1	1	1	1	4	4	2	2	1	1	1	4	3	3	2	2	1	1	1	1	2	4	3	2	2	3	1	2	1	1	1	1	3	3
b7eac6ba8f6495d8	4	1	1	2	6	1	1	2	1	4	2	2	1	2	2	1	2	1	2	2	1	3	1	1	1	4	4	4	3	4	4	1	2	2	2	3	3	2	1	3	1	2	2	2	1	2	2	2	2
01d7893426254799	4	1	1	1	2	3	2	2	1	4	4	3	2	3	1	1	2	1	2	2	4	4	3	3	2	5	5	5	5	5	5	3	3	2	3	2	5	3	5	3	2	2	3	1	2	1	2	1	1
374e38247405a00f	4	1	1	1	7	4	1	2	1	2	2	3	1	1	3	1	1	1	1	5	4	2	2	3	2	5	5	3	3	4	4	4	3	3	2	2	3	2	2	2	1	1	1	2	4	2	2	4	4
11cf5fe3f4795c7d	4	1	1	1	2	1	1	1	1	2	3	2	1	1	1	2	1	1	1	1	3	3	3	1	1	5	4	1	3	4	3	2	3	2	3	2	2	1	1	3	3	2	2	2	3	2	2	2	2
ca953261a3d1be8e	4	1	3	2	2	2	1	1	2	2	3	1	1	2	4	2	2	1	1	2	3	3	2	1	1	2	3	4	4	3	4	3	3	3	3	2	3	2	2	2	2	1	2	1	2	2	3	4	2
86dcea2333ca9981	4	1	1	1	2	1	1	2	2	3	3	2	1	1	1	4	2	2	2	4	3	4	4	2	3	3	4	4	4	4	4	2	3	3	3	4	3	3	3	4	3	3	3	2	3	3	3	3	4
65ccd71c70a173b8	4	1	1	1	1	1	2	2	1	3	4	2	1	2	2	2	3	3	3	1	1	2	3	1	1	1	1	2	2	2	2	1	1	1	1	1	1	1	1	2	2	2	2	1	1	1	1	2	2
aee7cc5cfa067d48	4	1	2	2	5	2	1	1	2	1	5	2	1	1	4	3	1	1	1	2	1	1	1	2	1	4	5	4	3	3	5	2	2	2	2	3	4	4	5	3	2	3	2	3	3	3	3	2	2
46249fdf4c7f671d	4	1	2	2	7	4	1	2	1	3	5	3	2	2	3	2	2	2	2	2	2	2	1	1	1	2	2	1	1	1	2	2	2	2	2	1	1	1	1	1	1	1	1	2	1	1	1	4	5
7c8ce839cf350540	4	1	1	1	6	1	2	1	1	1	4	2	1	1	3	1	1	1	1	1	1	1	1	1	1	1	1	1	1	1	1	1	1	1	1	1	1	1	1	1	1	1	1	1	1	1	1	1	1
31f45a08ca86d798	4	1	2	2	2	2	1	1	2	1	4	2	1	1	1	1	1	1	1	1	5	5	3	2	2	5	5	3	4	4	4	3	3	3	3	3	3	3	3	3	4	4	4	1	3	3	2	4	1
5bee6b609f6e60c8	4	1	2	4	1	4	2	2	1	1	2	3	2	1	1	3	5	5	5	4	1	1	3	2	4	3	4	4	5	5	5	5	5	5	5	5	5	5	5	5	5	5	5	4	4	4	4	4	4
3cb2d3bfa918ca8b	4	1	2	1	4	2	1	2	2	1	2	2	1	1	3	1	2	3	5	1	2	3	4	1	2	3	4	1	2	3	4	1	2	3	4	1	2	3	4	1	2	3	4	1	2	3	4	1	2
77f39af4a0f6b8dc	4	1	1	2	2	4	1	2	1	2	2	3	2	1	5	1	1	1	1	2	2	2	1	1	1	2	2	2	2	2	1	1	1	2	2	4	5	3	2	2	2	2	2	1	1	1	1	2	2
b38c186141773332	4	1	1	1	6	2	1	2	1	2	1	2	2	1	3	1	3	2	1	3	2	3	3	1	2	4	4	3	3	4	3	2	3	2	2	2	3	2	2	2	2	2	2	2	1	2	1	2	2
0756e933fe31b97f	4	1	1	1	2	3	1	2	1	1	4	2	1	1	3	2	1	2	1	1	1	2	2	2	2	1	2	1	1	2	2	2	2	1	1	2	2	1	1	2	1	1	2	1	1	2	2	1	2
65fff1e81f800d0a	4	1	2	2	2	2	1	1	2	1	4	1	1	1	3	2	2	2	2	2	5	4	3	1	1	5	5	2	4	4	4	3	3	3	3	4	5	5	5	4	5	5	5	3	3	3	3	3	2
8d3fe3429b4a2b5e	4	1	3	2	4	4	2	1	1	3	1	2	2	1	5	1	2	2	1	1	2	1	2	2	1	1	1	1	1	1	1	1	1	1	1	1	2	1	3	1	2	1	2	2	2	1	1	1	2
f20466f28548aa38	4	1	1	1	2	4	1	1	1	2	3	1	1	2	4	2	2	1	2	2	3	2	1	2	2	4	4	4	3	3	4	3	3	4	3	3	2	2	2	4	2	2	1	3	3	3	2	4	5
8aca983c1ec3ee02	4	1	1	1	2	3	1	2	1	1	4	2	1	1	2	1	2	2	1	1	2	1	1	1	2	1	2	1	2	1	1	2	1	2	2	2	2	1	1	1	1	2	2	2	1	1	2	2	1
ff3b9a43d2b1e76d	4	1	1	2	8	3	1	1	2	4	4	2	1	3	2	2	4	4	3	2	4	3	4	2	3	1	4	5	5	5	5	2	4	4	4	2	4	3	1	3	2	2	1	1	1	3	2	2	2
00ba3fc8e04fab30	4	1	1	1	2	1	1	1	1	2	3	2	1	1	4	1	2	1	1	3	3	4	1	1	3	3	3	4	4	4	4	1	2	2	1	2	2	3	3	3	2	2	2	2	3	2	2	2	1
077c6c83098460a5	4	1	1	1	1	1	1	1	1	1	3	1	1	2	2	1	1	1	1	2	4	4	2	2	1	2	2	2	1	2	3	3	2	3	2	3	2	3	2	2	3	2	2	2	2	2	2	2	1
5d63e235dd333221	4	1	2	2	3	2	1	1	1	1	5	1	1	1	2	2	2	2	2	3	3	4	4	2	2	4	4	3	3	3	3	2	3	3	3	2	3	2	2	4	4	4	4	3	3	3	3	2	3
9cfc20243320bf8e	4	1	2	1	6	2	1	1	1	1	4	2	1	1	2	1	2	2	2	1	2	2	2	3	4	4	1	1	2	3	3	2	3	3	3	2	2	5	3	1	2	2	2	2	2	1	1	3	2
ced160eb5bb65f96	4	1	2	2	3	2	1	1	2	1	4	1	1	2	2	2	2	1	1	3	3	3	3	2	3	3	3	2	3	3	2	2	3	2	2	2	2	3	2	2	3	2	2	2	2	2	1	2	3
726ec2372caad75a	4	1	1	2	2	1	1	1	1	1	3	1	1	1	4	1	1	1	1	1	1	1	1	1	1	1	1	1	1	1	1	1	1	1	1	1	1	1	1	1	1	1	1	1	1	1	1	1	1
8a9bec6ba99c76ee	4	1	2	2	7	2	1	1	1	2	4	1	1	1	7	2	2	3	2	1	4	3	2	2	4	4	4	4	4	4	2	4	4	2	4	2	2	3	2	1	1	1	1	2	2	3	1	1	2
34e365b993fa2d80	4	1	1	1	6	3	1	2	1	3	3	2	1	3	3	1	2	1	1	1	4	4	3	1	1	5	5	1	1	1	1	3	3	3	3	2	3	4	1	3	1	1	1	4	3	4	1	5	5
541605a243b657f1	4	1	1	1	6	3	1	1	2	3	2	3	1	1	3	1	2	4	2	2	1	1	1	1	2	2	5	5	5	4	5	4	2	2	2	1	5	4	4	5	2	4	2	2	2	2	2	1	1
da4d7af82939bf92	4	1	2	2	1	4	1	2	1	3	5	3	1	2	4	2	4	4	4	2	3	3	4	1	1	2	3	4	3	5	4	1	3	4	4	1	3	3	4	3	1	3	2	1	1	1	1	5	5
aa22f36187d7fa16	4	1	1	2	8	3	1	1	1	3	3	2	2	1	5	1	2	2	2	3	3	2	2	1	2	2	3	4	4	4	4	2	2	2	2	2	2	2	4	2	2	2	2	2	2	2	2	3	3
29fb0365b6dc5860	4	1	2	1	4	1	2	2	2	1	4	1	2	1	5	2	3	3	3	2	3	3	2	3	3	3	3	3	4	3	3	3	3	3	3	3	2	3	3	3	2	2	2	2	2	2	2	2	3
f63afdebb9cb61b0	4	1	1	1	8	1	2	2	2	1	2	3	2	3	3	1	1	1	1	1	1	1	1	1	1	1	1	1	1	1	1	1	1	1	1	1	1	1	1	1	1	1	1	1	1	1	1	1	1
682bdd728d037030	4	1	1	1	2	4	1	1	1	2	2	2	1	1	3	2	4	3	2	2	4	4	1	2	3	5	4	3	5	5	5	3	3	3	3	3	4	3	2	3	2	2	2	3	2	2	2	3	3
0ea61394521feffb	4	1	1	1	6	4	1	2	1	3	4	2	1	1	4	2	2	2	2	2	2	3	2	2	2	4	4	4	3	3	3	2	2	2	2	3	3	3	3	3	3	3	3	2	2	2	2	2	3
a9c12ee92c60d153	4	1	1	2	6	3	2	1	1	2	2	3	1	1	2	1	2	3	3	2	3	4	3	2	5	4	2	5	5	5	5	3	3	3	3	2	3	2	3	2	1	1	1	2	2	2	2	3	3
2b367b08f441f787	4	1	2	2	2	2	1	1	2	2	4	2	1	2	3	3	2	2	2	2	3	3	2	2	2	4	4	3	3	3	4	2	2	2	2	2	2	2	2	2	2	2	2	2	2	2	2	2	2
5743c4b5e14df8dd	4	1	2	3	7	2	1	1	1	2	4	2	1	1	2	1	2	1	2	1	2	1	1	1	1	2	1	1	2	2	1	1	1	1	1	1	3	1	5	1	2	1	3	1	3	3	2	1	1
a5070a91b5057ee5	4	1	1	2	6	4	1	1	1	3	3	2	2	2	5	2	2	2	2	2	3	3	2	1	1	1	1	2	1	2	1	1	1	1	1	1	5	5	5	1	2	1	2	2	1	2	1	1	1
ea286b8d05e2869d	4	1	1	2	2	1	1	1	1	2	2	2	2	1	2	2	3	1	1	3	2	2	2	1	2	3	2	2	3	1	2	2	1	1	2	1	1	1	1	2	2	3	2	1	2	1	1	2	1
729dcfea3a1ad405	4	1	3	2	3	4	1	1	2	2	4	1	1	1	3	1	1	1	1	1	1	1	1	1	1	1	1	1	1	1	5	1	1	1	1	1	1	1	1	1	1	1	1	1	1	1	1	3	1
f262be08facac760	4	1	1	1	1	3	1	2	2	1	1	1	1	1	2	3	2	2	3	1	3	3	2	1	1	1	1	1	1	1	1	1	1	1	1	1	1	1	1	1	1	1	1	1	1	1	1	1	1
6ee0e530db794639	4	1	2	2	6	4	1	2	1	1	2	1	2	2	2	1	1	1	1	1	2	1	1	2	2	1	1	2	1	2	1	1	2	1	1	2	1	2	2	2	1	2	1	1	1	1	1	2	2
00b39b5fb39e202e	4	1	2	2	2	2	1	2	1	3	3	2	1	1	2	2	2	2	2	2	2	2	2	2	2	2	2	2	2	2	2	2	2	2	2	2	2	2	2	2	2	2	2	2	2	2	2	2	2
d1da1fec8097ade1	4	1	1	1	2	3	2	1	1	2	4	3	1	1	7	2	2	2	2	2	2	2	2	2	2	2	2	2	2	2	2	2	2	2	2	2	2	2	2	2	2	2	2	2	2	2	2	2	2
1d27211037e5f1c7	4	1	1	1	5	3	1	1	1	3	3	2	1	1	3	2	2	1	2	2	5	5	2	1	2	5	5	3	5	3	3	2	2	2	2	3	2	1	1	3	2	1	2	2	2	2	1	2	2
cd950db72260cc82	4	1	2	2	2	2	1	1	1	2	4	1	1	1	2	2	3	3	1	2	3	2	1	1	2	3	4	3	3	2	2	2	2	2	2	1	2	2	1	2	3	2	2	2	2	2	2	3	2
bca43c8574e45170	4	1	1	1	6	1	1	2	1	2	2	1	1	1	2	2	2	2	2	3	2	3	3	4	4	3	3	5	4	4	4	2	3	3	3	3	3	3	3	2	3	2	3	2	2	2	2	2	3
d09424e1911acee7	4	1	1	2	6	3	1	2	2	4	1	2	1	1	3	1	1	1	1	1	4	3	1	1	1	3	4	4	3	3	3	1	3	3	3	2	1	2	2	3	3	3	3	2	2	2	2	2	2
d1190948ab2c6b54	4	1	1	4	6	4	1	2	2	2	3	2	1	1	3	3	2	2	3	2	3	4	3	2	2	3	4	2	4	4	4	3	3	2	2	2	2	2	2	3	3	2	3	2	2	2	2	3	3
f535ff7ab0e7b3d4	4	1	1	1	6	1	1	2	1	2	3	3	1	1	1	3	1	1	1	2	3	3	3	2	2	3	3	5	5	5	5	3	2	2	3	4	4	3	2	4	3	3	2	2	2	3	1	3	2
88692310bcee947f	4	1	2	1	3	2	1	1	1	3	2	2	1	1	3	1	2	1	2	2	1	2	2	2	2	1	2	2	2	1	2	1	2	2	2	2	2	3	3	2	3	3	3	2	2	2	2	2	2
1161d414d79a120f	4	1	1	1	6	3	1	1	1	3	3	1	1	1	5	3	3	3	3	2	4	3	2	2	2	4	4	4	2	4	4	4	4	3	5	5	3	2	2	2	1	2	1	2	4	3	1	2	1
be72dc403a81c5c7	4	1	2	1	2	1	1	2	2	4	4	3	1	1	3	1	1	1	1	1	2	2	2	1	1	1	1	3	2	2	3	1	2	2	2	1	1	1	1	1	2	2	2	2	2	1	1	2	2
a9b43c43130c5de7	4	1	3	2	3	3	2	1	1	1	3	2	1	2	3	1	1	2	1	1	1	1	1	1	1	1	1	1	1	1	1	1	1	1	1	1	1	3	1	1	1	1	1	3	1	2	1	1	2
d01c5ade330e1868	4	1	2	1	2	2	1	2	1	1	2	1	1	2	2	1	2	2	3	1	2	1	1	2	3	3	3	1	1	2	4	3	1	3	4	2	3	4	1	1	3	2	3	2	2	2	2	3	3
bf9816383f60763c	4	1	1	2	6	4	1	1	1	1	4	1	2	2	1	2	1	2	1	1	2	2	2	1	1	1	1	1	2	2	1	1	1	2	2	1	1	2	2	2	2	1	1	2	2	2	2	1	1
8293e2de0892494d	4	1	1	1	4	1	1	2	2	3	3	3	1	2	1	2	4	2	3	3	4	3	1	3	4	2	4	4	5	4	4	3	3	2	3	2	3	1	1	3	3	2	2	1	2	2	1	4	4
5d2e83f73684a709	4	1	1	1	6	3	1	2	2	3	2	1	1	1	1	1	5	2	3	1	3	3	1	1	1	1	3	3	2	2	2	1	1	3	3	5	5	2	5	2	5	2	2	1	1	1	1	2	3
55d3033ba3675d31	4	1	3	3	7	1	1	1	2	2	3	1	2	1	1	1	2	1	2	1	2	1	2	1	2	1	2	1	2	1	2	1	2	1	2	2	2	2	2	2	2	2	2	1	2	1	2	1	2
4ece16bb19bc386a	4	1	1	2	6	2	1	2	1	2	3	1	2	1	3	2	1	1	1	2	1	2	1	1	1	3	4	3	2	2	4	2	1	2	1	2	2	3	2	1	1	1	1	1	1	2	2	2	3
8b39a12a6c17e26e	4	1	2	1	3	2	1	1	1	2	4	1	1	1	4	1	3	3	2	1	2	1	1	1	2	1	2	3	1	1	4	4	1	2	3	1	3	2	2	1	3	3	2	1	2	2	1	2	1
c3e84bd7b027a682	4	1	1	1	6	2	1	2	2	1	2	2	1	2	3	3	3	3	2	3	4	3	3	3	3	3	3	4	4	3	3	3	3	3	4	3	3	3	3	3	3	2	3	2	2	2	2	1	1
e7330194a557570e	4	1	2	1	2	3	1	2	2	1	2	1	1	1	4	1	2	2	2	3	4	4	3	1	1	4	4	4	4	3	4	2	2	2	2	3	3	4	2	2	2	2	2	2	2	2	2	3	3
4686f7fc03b1dd38	4	1	1	1	2	1	1	1	2	1	3	2	1	2	2	1	1	1	1	1	1	1	1	1	1	2	3	2	3	2	3	2	2	2	1	3	3	2	2	3	2	2	2	1	1	1	1	2	2
d97abf455eb3be2e	4	1	1	1	6	1	1	2	2	1	2	2	1	2	2	1	1	1	1	2	3	3	2	1	2	1	1	2	2	2	2	2	2	2	1	2	3	1	3	2	3	2	3	2	2	2	2	2	1
30e80d695f7011fd	4	1	1	1	4	4	1	2	1	2	3	2	1	2	4	2	1	2	2	2	4	2	2	1	3	2	1	4	3	2	4	2	1	2	2	1	2	2	3	4	2	2	2	1	2	1	2	3	2
c42c1f8591b4fc4d	4	1	2	3	2	2	2	2	1	1	4	1	1	1	3	1	1	1	1	1	2	2	3	1	1	2	3	3	2	3	4	1	2	2	2	1	3	1	1	1	1	1	1	1	1	1	1	2	3
71f0e5372ae6553e	4	1	2	1	7	2	1	2	2	1	2	2	1	1	3	1	2	1	2	1	3	3	4	1	2	3	3	1	1	2	2	1	2	2	1	1	1	1	1	1	1	1	1	1	2	2	1	1	2
af585eb0b79e60a1	4	1	1	2	3	2	1	1	1	1	4	2	1	2	4	3	2	2	1	2	2	2	2	1	2	2	2	1	3	2	1	2	2	2	2	1	1	1	1	3	2	2	2	1	2	1	2	4	3
90906598e3fee43c	4	1	1	1	2	2	1	1	1	3	3	1	1	1	4	1	1	1	1	3	4	4	4	1	1	3	3	3	3	2	3	1	2	1	1	2	3	2	2	2	2	2	2	2	1	1	2	2	2
92ccbc95ba38c9c1	4	1	1	2	2	4	1	2	2	2	4	2	2	2	3	3	2	2	2	3	4	4	3	1	2	3	5	4	5	5	4	2	3	4	3	3	3	3	3	3	3	3	3	3	2	2	2	2	2
8bcaa06fb9bc1409	4	1	3	3	4	3	1	1	1	2	2	1	2	1	1	1	1	1	1	1	1	1	1	1	1	1	1	1	1	1	1	1	1	1	1	1	1	1	1	1	1	1	1	1	1	1	1	1	1
c7ada1861007f8e8	4	1	1	1	1	1	1	1	1	1	3	1	1	2	4	1	2	1	2	2	3	2	1	2	2	3	2	2	3	2	2	3	2	2	2	3	2	2	3	3	2	2	2	3	3	2	3	3	2
81c84820496c4608	4	1	1	2	1	4	1	1	1	3	2	1	1	1	2	4	4	3	3	2	2	3	3	2	4	3	4	5	5	5	4	4	4	5	5	3	5	4	5	4	1	2	3	2	3	2	2	4	4
1a86370a0bd9b324	4	1	2	1	7	2	1	2	1	2	4	1	1	2	2	1	2	1	1	1	5	3	3	1	1	1	1	5	4	5	5	3	3	3	3	3	3	2	2	2	2	1	1	2	2	2	1	3	2
7fc9112d8dca06e1	4	1	1	2	7	1	1	1	1	2	3	1	1	1	2	2	2	2	2	2	2	2	2	1	1	2	5	3	3	3	3	3	3	3	3	3	3	3	3	3	3	3	3	3	3	3	3	2	3
a13fcf34e89172bf	4	1	1	1	4	3	1	2	1	4	2	2	1	1	5	1	2	3	3	1	3	4	4	4	4	4	3	2	2	2	3	4	4	4	4	2	2	2	2	2	2	2	2	2	2	2	2	3	3
ba3437c01abf9d41	4	1	1	1	1	1	1	1	1	1	3	1	1	2	2	1	2	2	2	2	3	2	3	3	2	2	2	2	3	2	3	2	2	3	3	2	2	3	3	2	2	2	3	2	2	3	2	2	1
d6678c59b95aba36	4	1	1	1	6	1	2	2	1	1	2	2	1	2	5	1	1	1	1	2	1	1	2	2	2	1	1	1	5	2	1	1	1	1	1	1	2	1	1	1	1	1	1	1	2	2	1	5	5
c27530d15ed9aa06	4	1	1	2	7	2	1	2	1	2	3	3	1	1	1	2	2	2	3	2	3	2	2	2	2	3	4	2	4	4	4	3	3	4	4	3	4	4	4	4	3	2	2	1	2	3	3	2	4
983eeea4462b69f5	4	1	2	1	2	2	1	2	1	2	4	1	1	1	7	3	3	3	3	2	2	3	3	1	1	1	1	1	1	1	1	1	1	1	1	1	1	1	1	1	1	1	1	1	1	1	1	1	1
94d04413e0d11d42	4	1	1	1	1	1	1	1	1	1	3	1	1	2	7	1	2	3	2	2	2	1	2	2	2	3	2	2	2	3	2	2	3	2	3	2	2	3	2	2	2	3	3	3	2	2	3	1	2
d090e4d98caa49bb	4	1	1	1	8	1	1	2	2	3	3	3	1	3	2	4	4	2	3	4	4	2	4	1	2	4	3	5	5	5	5	2	2	2	2	4	5	5	2	5	5	5	5	2	2	2	3	2	1
714ec91512bd7e55	4	1	1	1	6	4	1	2	1	2	3	1	1	1	3	1	2	2	1	1	2	2	2	1	2	2	2	3	4	3	3	2	2	2	2	2	2	2	2	2	2	2	2	2	2	2	2	2	4
58da9505d8f07adb	4	1	2	1	2	1	1	2	1	1	3	1	1	1	2	1	2	2	2	1	2	2	1	1	3	2	2	2	3	1	2	1	1	2	3	1	2	1	2	2	1	2	1	1	3	3	2	1	2
9287b615985fbac2	4	1	1	1	5	4	1	2	2	2	4	1	2	1	3	1	1	1	1	3	5	4	1	2	2	4	3	3	2	3	3	2	2	2	2	2	3	2	3	2	2	2	2	1	1	1	1	2	3
6b1e06f836c75d7b	4	1	1	1	6	2	1	2	2	1	3	2	1	3	3	2	1	1	1	3	3	4	4	1	3	1	1	5	5	5	4	3	3	4	4	4	4	4	2	4	3	2	2	2	2	2	2	4	2
2780d270da4924ea	4	1	2	1	2	1	1	2	1	1	2	2	2	1	2	1	1	1	1	1	1	1	1	1	1	1	1	1	1	1	1	1	1	1	1	1	1	1	1	1	1	1	1	1	1	1	1	1	1
59392c142b0dc681	4	1	1	2	7	3	1	2	1	1	3	1	1	3	4	3	3	3	3	2	3	1	4	1	1	5	4	1	3	3	3	2	2	4	4	1	1	1	1	3	3	2	2	2	2	2	2	2	3
46b2331efa5d9725	4	1	1	2	7	4	1	2	1	3	2	2	1	2	2	2	2	2	2	2	2	2	2	2	2	2	2	2	2	2	2	2	2	2	2	2	2	2	2	2	2	2	2	2	2	2	2	2	2
2e07f7db317ad488	4	1	3	1	7	3	1	1	1	1	4	1	1	1	2	4	4	3	3	3	2	3	2	2	2	2	2	2	2	2	2	2	2	2	2	3	3	2	3	2	2	2	2	2	2	2	2	1	2
fa304342c81babb5	4	1	1	2	2	2	1	2	1	2	3	2	1	1	3	2	1	2	2	2	2	2	2	2	2	2	1	2	2	2	1	2	2	2	1	1	2	3	2	1	1	1	1	2	1	2	2	2	1
296f2cfd0bec2a1f	4	1	1	2	2	2	1	2	2	1	1	1	1	1	6	5	1	5	2	1	1	4	2	1	3	3	2	4	1	3	4	1	1	1	5	2	1	1	1	1	2	3	3	1	2	2	4	1	3
728cb2e6f6c8b9ee	4	1	1	1	7	1	1	1	1	1	2	1	1	1	6	2	2	2	2	2	1	2	1	2	1	2	1	2	1	1	2	2	2	1	2	1	2	2	2	1	2	2	1	2	1	1	2	2	2
afcfd5baac61dc0f	4	1	1	1	1	1	1	1	1	1	3	1	1	2	2	1	2	3	2	2	2	3	3	2	2	3	2	1	3	2	2	2	2	1	3	2	3	3	2	2	3	2	3	2	3	2	3	2	2
cdcb499bef49e027	4	1	2	1	2	1	1	2	1	1	1	2	1	2	2	1	1	1	1	5	1	1	1	1	1	1	1	1	1	1	1	1	1	1	1	1	1	1	1	1	1	1	1	1	1	1	1	5	5
67de6e5c9b44a5f0	4	1	2	1	3	2	1	1	1	2	2	1	1	1	4	1	1	1	2	2	2	1	2	1	2	2	3	1	1	2	1	1	1	2	2	1	1	2	2	1	2	2	2	2	2	1	2	2	2
685dffc70328bd2d	4	1	3	3	1	1	1	2	2	1	3	1	2	2	4	2	1	1	1	2	3	3	1	1	1	2	3	2	2	1	2	2	1	2	1	2	2	2	2	2	1	2	2	1	1	2	1	2	2
28fa3faa66f15f7f	4	1	1	2	7	4	1	2	1	4	3	3	1	1	3	1	4	3	4	2	3	3	4	1	2	4	4	2	3	3	2	4	4	4	4	2	2	2	2	3	2	2	2	3	3	3	3	3	4
f133a693774b7b26	4	1	2	1	7	2	2	2	1	1	3	3	1	1	3	3	2	4	5	2	2	1	2	2	2	2	2	2	2	2	2	2	2	2	2	2	3	3	3	1	2	2	2	1	2	1	1	2	2
94209f1e50e7c495	4	1	2	2	4	1	1	1	1	1	2	1	1	2	2	1	2	1	2	2	1	2	1	2	2	1	2	2	1	1	1	1	2	1	2	1	2	1	1	1	2	1	1	1	1	2	1	1	1
42b3ab5506fb0498	4	1	3	3	2	2	1	1	1	2	4	1	2	2	4	2	1	2	1	3	2	3	2	2	3	1	2	2	3	2	2	2	1	2	2	2	2	1	1	3	2	2	2	1	2	3	2	1	2
fc325802162d1cb4	4	1	2	3	1	2	2	2	1	2	2	2	1	1	1	1	2	2	2	1	2	1	2	1	1	2	2	2	1	1	2	1	1	2	2	1	3	3	2	1	4	2	1	3	3	3	3	3	1
189660c475d60b4d	4	1	1	1	1	1	1	1	2	2	2	1	1	1	6	1	1	1	2	5	4	4	5	2	1	2	2	2	1	2	2	2	1	2	2	1	1	1	1	1	2	1	2	3	2	2	2	2	1
[truncated: 7 more columns]
